# Supplementary material for: Identification and characterization of expression profiles of neuropeptides and their GPCRs in the swimming crab, Portunus trituberculatus
Source: PeerJ. 2021 Sep 15;9:e12179. doi: 10.7717/peerj.12179 (PMC8449533; doi:10.7717/peerj.12179)
Supplement: Supplemental Information 1 [file peerj-09-12179-s001.xlsx]

## Sheet: Table S1
Name	bp	aa	lack5'	lack3'	Complete	Phylogenetic Analysis	Best BLASTp match	Best match species	E-value	Ident	Accession Num.
A-family GPCRs
Pt-GPCR-A1	5712	668					5-hydroxytryptamine receptor 4	Portunus trituberculatus	0	0.9742	MPC48638.1
Pt-GPCR-A2	3808	458				AST-AR	allatostatin A receptor-like protein	Homarus americanus	0	0.8643	QCB19932.1
Pt-GPCR-A3	1122	352				corazonin receptor	corazonin receptor	Carcinus maenas	0	0.9155	AVA26879.1
Pt-GPCR-A4	2898	492				CCAPR	crustacean cardioactive peptide receptor, partial	Cancer borealis	0	0.009284	AIT57587.1
Pt-GPCR-A5	1774	258				AST-CR	C-type allatostatin receptor	Scylla paramamosain	0	0.9768	QDQ19209.1
Pt-GPCR-A6	3002	656				ETHR	ecdysis triggering hormone receptor subtype-B	Manduca sexta	2e-103	0.4217	AAX19164.1
Pt-GPCR-A7	3686	459				FMRFamide receptor	FMRFamide receptor-like	Portunus trituberculatus	0	1	MPC18571.1
Pt-GPCR-A8	3506	423				proctolin receptor	FMRFamide receptor-like	Penaeus vannamei	4e-141	0.7337	XP_027209721.1
Pt-GPCR-A9	1617	398					FMRFamide receptor-like	Penaeus vannamei	2e-114	0.5541	XP_027235306.1
Pt-GPCR-A10	2510	670				proctolin receptor	FMRFamide receptor-like, partial	Penaeus vannamei	3e-144	0.6171	XP_027230704.1
Pt-GPCR-A11	2557	700				Burscion receptor	Follicle-stimulating hormone receptor	Portunus trituberculatus	0	1	MPC59294.1
Pt-GPCR-A12	2794	511				Moody receptor	G-protein coupled receptor moody-like	Penaeus vannamei	0	0.5856	XP_027221172.1
Pt-GPCR-A13	1952	408				Moody receptor	G-protein coupled receptor moody-like isoform X2	Zootermopsis nevadensis	2e-138	0.5122	XP_021937582.1
Pt-GPCR-A14	4154	118				Burscion receptor	leucine-rich repeat-containing G-protein-coupled receptor 2	Macrobrachium nipponense	0	0.6456	QMU26263.1
Pt-GPCR-A15	783	244				SIFamide receptor	LOW QUALITY PROTEIN: neuropeptide SIFamide receptor-like	Penaeus vannamei	1e-122	0.748	XP_027238919.1
Pt-GPCR-A16	2803	543				GPA2/GPB5 receptor	luteinizing hormone receptor	Eriocheir sinensis	0	0.8602	QCE21330.1
Pt-GPCR-A17	1616	156				CCHamide receptor	Neuropeptide CCHamide-1 receptor	Portunus trituberculatus	8e-112	1	MPC46080.1
Pt-GPCR-A18	4063	476				NPFR	Neuropeptide F receptor	Portunus trituberculatus	0	0.997	MPC54120.1
Pt-GPCR-A19	3275	494				NPY receptor	Neuropeptide SIFamide receptor	Portunus trituberculatus	0	1	MPC16467.1
Pt-GPCR-A20	817	224				RYamide receptor	Neuropeptide Y receptor	Portunus trituberculatus	3e-70	1	MPD03317.1
Pt-GPCR-A21	4747	458				sNPFR	Neuropeptide Y receptor type 2	Portunus trituberculatus	0	1	MPC71441.1
Pt-GPCR-A22	654	212					neuropeptide Y receptor type 2-like isoform X2	Penaeus vannamei	3e-65	0.5369	XP_027212442.1
Pt-GPCR-A23	2634	492					orexin receptor type 1-like isoform X1	Penaeus vannamei	0	0.6554	XP_027212435.1
Pt-GPCR-A24	3200	553				RYamide receptor	PREDICTED: neuropeptide Y receptor-like	Hyalella azteca	5e-107	0.4727	XP_018027232.1
Pt-GPCR-A25	1671	466					putative G-protein coupled receptor	Portunus trituberculatus	0	0.9949	MPC45162.1
Pt-GPCR-A26	3335	336					putative G-protein coupled receptor AH9.1	Portunus trituberculatus	0	1	MPC39775.1
Pt-GPCR-A27	4477	732				Moody receptor	putative G-protein coupled receptor moody-like	Penaeus vannamei	0	0.5877	ROT80371.1
Pt-GPCR-A28	2760	408				myosuppressin receptor	putative myosuppressin receptor IV variant 1	Homarus americanus]	0	0.7786	QNH74780.1
Pt-GPCR-A29	2452	434				NPFR	putative neuropeptide Y receptor	Penaeus vannamei	0	0.6989	ROT68912.1
Pt-GPCR-A30	545	177				cholecystokinin receptor	pyroglutamylated RFamide peptide receptor-like isoform X2	Zootermopsis nevadensis	4e-63	0.9	XP_021935551.1
Pt-GPCR-A31	800	246				pyrokinin receptor	pyrokinin-1 receptor-like	Penaeus vannamei	5e-89	0.6881	XP_027208909.1
Pt-GPCR-A32	2057	538				ITP-like receptor	QRFP-like peptide receptor	Penaeus vannamei	0	0.5199	XP_027239524.1
Pt-GPCR-A33	2839	795				relaxin receptor	relaxin-receptor 1	Sagmariasus verreauxi	0	0.6186	ARK36625.1
Pt-GPCR-A34	4388	401				AST-BR	Sex peptide receptor	Portunus trituberculatus	0	1	MPC64905.1
Pt-GPCR-A35	1650	176				myosuppressin receptor	Sex peptide receptor	Portunus trituberculatus	5e-79	1	MPC62902.1
Pt-GPCR-A36	2066	379				tachykinin receptor	tachykinin receptor	Periplaneta americana	6e-151	0.6236	ARK07245.1
Pt-GPCR-A37	2480	705				natalisin receptor	Tachykinin-like peptides receptor 86C	Portunus trituberculatus	0	0.842	MPC13998.1
Pt-GPCR-A38	1262	338				natalisin receptor	tachykinin-like peptides receptor 86C, partial	Penaeus vannamei	2e-135	0.8009	XP_027229810.1
Pt-GPCR-A39	4031	499				Vasopressin receptor	Vasopressin V1a receptor	Portunus trituberculatus	0	0.9975	MPC75318.1
B-family GPCRs
Pt-GPCR-B1	2202	718				calcitonin receptor	calcitonin gene-related peptide type 1 receptor-like	Daphnia magna	6e-110	0.3926	XP_032776374.1
Pt-GPCR-B2	2226	542				calcitonin receptor	corticotropin-releasing factor receptor 2-like	Penaeus vannamei	0	0.5629	XP_027227522.1
Pt-GPCR-B3	1502	398				PDFR	corticotropin-releasing factor receptor 2-like	Limulus polyphemus	1e-92	0.4748	XP_022237909.1
Pt-GPCR-B4	3322	441				DH31R	diuretic hormone 31 receptor	Carcinus maenas	0	0.8484	AXF54360.1
Pt-GPCR-B5	1820	514				DH44R	diuretic hormone receptor-like	Penaeus vannamei	2e-178	0.7586	XP_027237601.1
Pt-GPCR-B6	3600	654				PTH-like receptor	parathyroid hormone/parathyroid hormone-related peptide receptor isoform X1	Folsomia candida	1e-132	0.467	XP_021949466.1
Pt-GPCR-B7	1831	455				PDFR	pigment dispersing hormone receptor 41189	Carcinus maenas	0	0.9516	QNG56007.1
Pt-GPCR-B8	4827	455				PDFR	pigment dispersing hormone receptor 43673	Carcinus maenas	0	0.9385	QNG56008.1

## Sheet: Pt-GPCR sequences(aa)
Portunus trituberculatus GPCRs
Name	Unigene_ID	(ORF)sequence
A-family GPCRs
Pt-GPCR-A1	TRINITY_DN18140_c0_g2_i5	MPVVAALLLTVTLLGICFNCYILFLSCTQNFRQTRTTTHILLLHLGVIDL LLAAIFLFALFPSFLKEGWLSGAGCWVAGGAWATLHVAAVWTITALNLDK YVAIAAPLHYARFVSPARVAAAVGVSWVLAASLCALPMALPGMRGAPQPP TGCSLDLASAPPLLGRSYAFTLALLGYLLPALLVATANFRILVIARHHRH RIVTALWDVTVSAQATVTPQRSHFYLSRYRGRSAATTVCHLVGTFLLLYL PPAACVLYEAVARVRPPHTLVLANLVLLTLAPAINGFVYGIKSKVLRKNF KNFLRKRLYRSEVNYEIQSRAPSVSASRRPSMTPSLSMPLQHKLQRRMSE ILVQPSVAAAGDAATGAPRLVRRSSELSMRARGGSSCSITRE…
Pt-GPCR-A2	TRINITY_DN20907_c0_g1_i3	MDIEGDNTEVPMDEENGIEPFLTFLPPYILCNTTNYTKLPLCNNETKVVD EPEFEYAFIVAIVVPIIFGIIVLVGLFGNTLVVIVIIANKQMRSTTNYLI FSLAMADLLFIVFCVPFTASDYILPSWPFGSIWCQTVQYLTYVTAYASVY TLLLLSLDRFLAVVHPITALSIRTERNALYAICCSWILILTSCIPLYLCH GIKKQNFDGKVYIHCGFLDEDYNHMAFHIGFITTMYFVPLAVIVVLYLMI LNRLWYGVVPGGKSSAESVRGKKRVTRMVVIVVVTFIVCWFPIQLVLLLK SLGIYEMTTIKIIMQIAAQVLAYINSCVNPILYAFLSDPFRKAFRKVISC GPQRRMMALNGRTDGEKSMESRPLNPKPSPQTVPMTQFMSSA…
Pt-GPCR-A3	TRINITY_DN28405_c0_g1_i1	MQMFSLYLSTFILVLIGVDRFTAVRYPMRRSDTQRHCSYSIIFVWVLSGI LSIPQVLVFHVVRGPFIEDFYQCVTYGLYSPAWLEKLYAVFSLVCMFVLP LLILLLTYISTFVTLHKSEKVFRSERTTLGNTCPEFNRRRLLRKAKMRAL RISVVIVLAFVICWTPYYMMMIIFLFTTVEDNVAAELQSGIFFFGMSNSL VNPIIYGAFHLCHCHKRRTSFNLIVINRTGSNLQYRASTRASSRFTTYRS SGADLDTSVVNVFEDGVRYSFRRRSSRQKSILAASTRRPHEEGGGRDQFL RPSVRYGRRLKPVGRTHAGSYDPSPTSLSPLACLGEKRENDDEEDDDEER EET
Pt-GPCR-A4	TRINITY_DN16379_c0_g1_i1	MSGQVTGVPTTALPEATTQGPMGGGGTVPDDTGVLVEGGGPMLEEDGGEA LLELNCSVPCGNYTAPTNTSNVPGDSYYFYETEQFAVMWILFISIVVGNV AVIIALLLSKTRKSRTNFFIMHLALADLSVGLISVLTDIVWKSTVSWNAG NIACKTVRFAQVLVTYSSTYVLVALSIDRYDAITHPMNFSGSWRRARRLV AGAWVLSAIFASPSLVFFMETSVDGVMQCWIDFPKLWQWKLYMTLVALTV FLFPTVIIAACYAVIVYTIWSKGKVMTVTSKALGARNGEKRGANPDDDSR RASSRGLIPKAKIKTVKMTLVIVFVFILCWSPYIVFDLLQVYGYVPQSAT NIAVATFIQSLAPLNSAANPIIYCLFSTHICRNLRRIPAVEW…
Pt-GPCR-A5	TRINITY_DN15477_c0_g1_i1	MDNLTMDFVPLNCSFLARLEEANNTEITDMNCSLSLFEGGAGRMSTTAMV VTQLFYALTCLVGLCGNTLVIYVVTRFSKMQTVTNLYILNLAIADELFVI GIPFLMTTSVLGHWPFGSIMCKLYMITTSLNQFTSSLFLTIMSADRYIAV CHPISSPKFRTSMISKLVSLTAWTLSALMIVPVFMYSNTLEDDGLDTCNI FWPESHGVRGEIAFIRYSFALAFGIPLCLIFVFYSLVLHKLKTVGPKTKS KEKKKSRQK
Pt-GPCR-A6	TRINITY_DN18084_c0_g1_i1	MTSQTPFWTHPAAPTTPTVSYQAAHTGRPPGTVPTGGWGAEEGMGALGNS SLVVDDAATNFSLLDTPPHGDNKTHWASTAVMHMGVEVELFPDWLVGVWT GVLVTLMAVGVGGNVLVPVVVVRTRDLRSSTNFLLVNLAAADLLVLLVSL PTALVELHSRPETWVLGEPMCKLVPFVEYCVSHASVLTILVISFERYYAI CRPLRASYTCTKMRACTCILTIWAAAVLLSSPMLVMSKYLFVPYADGTMV PGCFTELTTFWSCLYINLVTAVFFFVPLVLLVLLYLVIGRSLMRDSASAA LQHRKVDLPNMKARKQVVVMLATVTVFFFVSLFPFRVLTLWIVWTPLETI ETIGPLRYFSFLYGTRVLFFANSAVNPILYNLTSTKFREAFL…
Pt-GPCR-A7	TRINITY_DN16155_c0_g1_i1	MLFMNDTEMAGSGDSPLVAEDDSILNSNESYQRDIDEMCLETFNTTMPTP RLMRFVVYGVLLTSVGLLGLAGNFISITILSRPKMQSSINCCLIGLTSFD MIVTTTSILMFGLPEICEYTQTMEWYSQGIYQLITPIVFPLALIAQTGSV YLTVTVTLERYIAVCRPLRARVLCTYGRAKIYVMSVAFLSILYNLPRFWE VTTKECFTDDEKTLRIVIPTQLRTNSFYIEFYIMWLYLFVMYLVPFLCLM IFNFFIYREVRAANHERQQLSRLQRKEIGLAVMLLVVVSVFFLCNVLAFI INILELMAIVVEELTMTSNLLVTINSSVNFIIYCIFGQKFRKLLLQMFCS SLLPRVARDSESAVIRNNSVYGESRNYTNGKTETFRLSSWDA…
Pt-GPCR-A8	TRINITY_DN15440_c0_g1_i1	MYNASTESPFPAAVLTSLAPQVSSTLAPLLESPLPSLGNLTDDGPEEVHE YAPFLALSRFVVQRVLVPLVLVVGVVGNSVTIIVLTRRQMRSSTNFYLTA LAISDLLYLVFIFSLSIRHHPGMNQPHHWLYWHYFRYALWLTDASSSTSI WLTVTFTIERYIAVCHPIKGKVICTESRALRVIVAVFVLCFTLTATTPHE WVILMNTDPDSGQSHLALAYSSLGSNTTYKKVFYWFTAVMFILLPLVLLA VFNSFLIHIVKQSRATRRTMTNTASERDSHSQSQENKITIMLIAVVLLAL LCQLPVAVLLLYQSFYESKPSSTSYYIELGLGNIFNLLAAINAACNFVLY CAMSDKYRRTFLRTFCSRWYRQPSPLHSWMATAYSNVEDGSP…
Pt-GPCR-A9	TRINITY_DN14217_c0_g1_i1	MTEDECHGNEKEDVEELYTAIFHYVFPALVVTGILTNTLNLIVLTRPLMR GRTYRWLRALACVDLSLCVLTVPVCLARGGVAPLRSAEVARYYAHFGWSL SIASQILSFYLMGMFALERFLAVCRHDLYPRSQTDAVFRGGVVSSAVFVL LLYLPTMVVGRVEAAGEGRWMPRDGYSMQEYTWYRAYAWLREIFSRLVPA ILITFCNVRITLRLKHLRNIREGFGSGVPAARRERERRLVLLLFWVTTLF YIFNTPVTVYYLGFLHTQRFCGKDMSASLLIFAAVSNLLQMLGNVSNFVL YFLISPEFHKTLCNLLACRDTGRPASLKLHSGNTTTTTMLPSTAAVITAI ITTANQDQSLTRPDSACRHHLPGGAAPLNGANNFSGMEARQP…
Pt-GPCR-A10	TRINITY_DN18262_c3_g3_i1	MDLLEDFSNGGDGGGGGGDMKNFSSLFLDVNSSYFLFPYNSNGSLYQLDY DYAAEGHNASLQHFPALGEFANPTSPSDTSSFASNASLFATSSNYAPYER FMDESRHWVQKVLVPLVMCVGVVGNSVSMVVLTRRKMRSSTNNYLTALAI SDLLYLVFVFSLSLQHHPNIKQPRHWFYWQYFRYALWLTDASSSTSIWLT VTFTIERYIAISHPIKGKMLCTVSRAKKVVAVVYFLCFALTATTPHEWVV VTRHETDTKEPYLSLDYSSLGQDSTYRHTYYWFTAVTFILLPLCLLSVFN FFLIQAVRMSKLTRRKMTLVSERDHYSHQQEHKITVMLIAVVILALVCQM PTAVLLLYSTVLEPPPRTKEFAVMRGLGNIFNLLNAINAAAN…
Pt-GPCR-A11	TRINITY_DN15756_c0_g1_i2	MGGEEEEEDEGGLSFERLWANLPTAFPPALRNYTHPHPGRPPPPQQPLTT PIRPQCIPLPGPFMPCRDLFDWWTLRCGVWIVFLLALMGNGVVVVVLVAA YAKMDVPRFLVTNLALADFFMGVYLGFLAVADASTLGEFRMYAIPWQMSA GCQVAGFLGVLSSELSVYTLAVITLERNYAITHAMHLQKRLSLRQAAYIM AAGWVFALTMAVLPLAGVSDYRKFAVCLPFETAGPGLGYVVFLMFINGVA FLILMGCYFKIYCAIRGSQAWNSNDSRIAKRMALLVFTDLVCWAPIAFFS LTSAFDLHLISLEEAKVFTVFILPLNSCCNPFLYALLTKQFKKDCVMLCK TIEESRVTRGIGRCRHSSNFSNRQTPANTNSAVDHTSQGDGK…
Pt-GPCR-A12	TRINITY_DN18915_c1_g1_i2	MASMGHIIILFMGNLLTIIALPMAKNLRTTATAFVVNLAVVELLFCVLIL PMSGAQYLYLQRHLQGSLLTDTHCIFFVCVRYTLTQVELQTILAIALTRA LAVSIPRFYQAMNRPTVIGVYIGAIWLYSFSARMPAAVGVMGQYMYNANT MECDLGNANKVARLVYLVVDAFIPVMLIFILYFFVFIMVVRRAVVRQRKF STNFPPPPSQIKMSSNRVARASKRSRAAVAPPTASTTSTSSTNAPQQRKG SSSSLKNFKKMVSETNLRARFTRQSSNMSQRLTSTRRDMRVARTIFIIFL LVLVCSVPVAVVHTIDPTVGRPVRFLLVHILYWFQYCLNVVVYVLMNRQY RDAYVDCLARVFPRFKRHRGLRFFWEKASISSRPQPNLTSKA…
Pt-GPCR-A13	TRINITY_DN13881_c0_g1_i4	MDHAGLSAELQGFPQVHNVSWQEAADEELQDTGASEIAKMSPGVATFIAV LFIGYLVLGLTGNFLTILALLRCPRVRNVTAAFIISLCVADFLFCILVLP WEVSRFLAGKWIWGEGWICTLFPLLRYWNVAVSLLSIAMITINRYIMIAH FSVYKLVYRKGWIALMIAFCWVFAFVMLLPTLLSKWGRFGFDPRLQTCSI IDEENKSPKQVLFGLGFCVPAIIIIICYSLIFYVIHKSEKRMRQHSSRSV NGAHHGPSLQPQPRMAGKMEREVRRRRNEWRITKMVLIIFIAFLITYLPI TLVKNLDKTVDYPGLHVLGYVLIYVSSCINPVIYVIMNRQYRQAYKTVLL CKRPRLPSLTSSHTERGKARGKAVVEELNDKTMMSQVSFSDA…
Pt-GPCR-A14	TRINITY_DN15756_c0_g1_i1	MALLPLLLLLILVPRPSPACPAPCSCLPAPAGVSRGVGVVCAGLGLIEVP LQLEDGREVVYVDLSNNELSDLPDLTFANYSSLLHLRLSGNRISNIANTA FHRLQLKELYLDNNLLASLPDALPTSLLRLSLEDNYFTTAPATLASLQSL QELNLARNKIKVISAGDFRNLSHLLSLSLHQNQLEDIEDGAFKSLQALQV LDLTENSLKEVPGAVLSCLHLTRLLLGHNRVAHLGETAFSGLRDLQQVTL QGNPITTVHPAAFTNLPSLTKLILKEIRGLSQFPHLNGSKSLEMIRIDRA SLTALPPSLCSFVPALRSLNLHLNAIKELPDLTDCAELRLLDLSDNAISS LGHASFRGAPLLQDLLLQDNRISHVPADAFVGLSSLQVLDLQ…
Pt-GPCR-A15	TRINITY_DN30258_c0_g1_i1	MLGWLMCKSVAYVQGVSVSASVNSLVAVSLDRFLAIWFPMKLQITTYRAR AIIVLIWIMAVVSPIPYFVYFETNIFIPDLPDLLVCVEMWPSREAEWLYF LIAHLLLCYLLPLVLISFCYFMIWIKVARRSIPGDTRDAAIQQMQQRSKV KVVKMLVVVVIIFMLSWLPLYVIFVRIKMGEELGEKEGAILAIVTPMAQW LGSSNSCINPILYAFFNKKYRNGFLAIIKSRSCCGTLRFDSYSCS
Pt-GPCR-A16	TRINITY_DN20076_c0_g2_i1	MGNLALRVAVWVVVVTAVVGNLAVMIVLISSKFKMTVSKFLMVNLALADL CMGLYLLIIAAMDLHTIGDYFNYAIDWQNGPGCKVAGFLTVFASELSIFT LTVITSERWYAITYAIHLNKRLKLSMAVKIMVGGWTYSIAMATLPLVGVS SYSKTSICLPMETGDGLSLAYLVSLLVVNGLAFFVITACYISMYFSISRH DATTEHSDLTVAKRMALLVFTDFACWAPIAFFGLTAVAGLPLINVTRAKI LLVFFYPLNSCANPYLYAILTKQYRRDLFILLARYGFCTKRAMKYKGAYS SVNNTFPHNTVVNAPNHRSSTLTQITLCDLTRTRTSQQSNNGSLLGGTIV SGSQDSLQRNVSPIRTPTKPETTCGCAGAENERLSTVQEMSH…
Pt-GPCR-A17	TRINITY_DN2042_c0_g1_i1	MVLAFVIIFAVCFLPLNVFTVWWHLDPLSEEHYDIYWHSIRIVGFCLSFI NSCINPIALYCVSGTFRKYYNRHVFCWCVGRRRRGDWDGADSTGTRLTTA MKTDHVPLKTVVANDNGSQTVPAHRHTPLAVTATTKTTTTTVFSRPCRDP DPASLV
Pt-GPCR-A18	TRINITY_DN18293_c1_g1_i1	MDNLTLTNDTNVTFSHDWTRIILETSQQNYLGTGARAALITVYALLMTGG ILGNLILAAVISRRPELRREPHNVYIINLTVSDVSLCVVCMPFTLLGLLH SHYTLGDIICKLVPTLQCTNILVSTATIVAIAADRYFTIVRVTANSRGRA RVPWSVAAIWLVSLAFTLPLFAYYYVKRVMFRELLLYEKCVETWPSPVVK YSWTIALIVMQYVIPILVLSIVHVRIHNYLSSHAMNQRDPRRAQRDIERN RRTTMLLTSVAATFAVCWLPWHVVNLLADFNYAGFVEAPEYFYVVFGSCH AIAMSSACTNPVLYGWLNTTLRNELSALLTFSRCRCSRRRTSGGGTVEGM SLLVHPPRNGAQGGIGKQCVLSISHEVMDKEEDRRKERSLKE…
Pt-GPCR-A19	TRINITY_DN16584_c0_g1_i1	MNASELAELCDGTGNNTTAAADRVTSPSGSIVTVSGWQGVTLATLQVGVM VVGLLGNTTVAASVWRQGTSRQKQQQPAAHRHALLLSLAMADLLVTLLCL PAALARLLVLPWAAHWVMCPLLAATQNTAHAASTLSIAFLALDRYLTVRW PKLAPKVASRTAQLLAGLWVMAVLLAVPRGLTAALAVPGPICSEHWPVPA LRVLYHTTVAAVVHLLPCATVILCHAAVASSLRRRGLDDTRMNLRPRQVI IMARECSLGGANTHKIVAASSSGGESDGDEERAALELRDTNNVPQVTLDA GKGRAPQAPPRPAPAIKPARNIHTIIRAHRRMRVRGPAQTASIFTSYRGH STETRRRLARMLVALGAVFAACWLPYVVALLIWAWRESPSTR…
Pt-GPCR-A20	TRINITY_DN3657_c0_g1_i1	MTRCQAKIIIASVWVLSLATTLPVAVYSRLLTPPVNFYALMDRQVCTEDW GPEESDKSRVAYSVALMLLQYFLPLTVLVFTYSRIAMVVWGKRTLGETPA RVDRIARSKRKTVKMMAACVIAYTLAWLPLNLYIVAADMPGGLLDLLPEG AHILLFFIVHSLAMSHTCYNPVIYFWMNGQFRHAYYRVLPCLHRLPFTTG LSEGLSSRQVTSKCEAQVCDVREAP
Pt-GPCR-A21	TRINITY_DN15759_c0_g1_i1	MMGSSTLPATSLSPTLRLATMNGSVDLEAEELNSTWRPETGLASFNTILD ANGSLSWTNSSPRDSDILSYPTTQAIFYIEYLTIFMLGVFGNCLVCYVVF RNKHMQNVTNYFITNLALADILLCVLAVPFTPFYTFMGEWMFGRLLCHLV TMAQGTSVYVSTLTLMSIAIDRFFVIIYPFRPRLSLPVCYMIIISIWLFS ISATLPYAFYMGMVEYQDRSYCEELWPSEFIRQVFSGFTAIMQFVVPFII ILICYGKISNRMNERVRAKPGSKSSKQEEADRERKRRTNRMLIAMVTIFG VSWLPMNVVHLVGDYYAPASTWSYYNLCFFITHVVAMSSTCYNPFLYAWL NENFRKEFQLVLPCFQQPPSTDRVGQWRSERTCNGNDTQETL…
Pt-GPCR-A22	TRINITY_DN12640_c0_g2_i1	MALHILRRRLYRETTSAYLLNVALCNVLMVAVLLPLSLAILLIQNWVFGS FLCYFVPMLQDVPLHVTMGTLLAVAGDSYRRVVSPHKPPLPPFPAVLATW ILGVCIVLPYALYMHYIDLQVLFGSQFAGMGICTVNLEDDVTEYIHCLFI ILFVLPLGVVAFLQIRVGVVLSSMDDPTPLSPPRPLDLGPPDPHPRVWNL HSTDRVFSSGLLT
Pt-GPCR-A23	TRINITY_DN17364_c5_g2_i1	MSPGEGSGDIGSISDKMLTQIIHNLQSFPNETVDLTQPHLRHSLSNVYPL YIFLYSLLVVCGTVGNAAMIAHILRRRLHRNPTNAYLMNIAVCQFIMSFP LLPLSLAILLVQNWIFGSFLCYFVPMIQDAPIHATMVTLVVVSVDRYRRI VYPHKARLPPFIAVLGVWITSVCVVLPYAIYMNYIDLQVLFGKQFKGAGI CTVNLGDDIAEYIRGLFIMLYVLPLAVIGFVQVRVSAELGRREGPLTLSV LDRSTSRSSPPDLWTTPQSPPPSSSAILTELPEGQELFSDAHQLPSFLSP SPGCHTPSLVRGRADSLYQLEGAEAEAALERRTQRYLASMVTAFALCLCP LMILRLVKNMVMETYDNSGHFDITFITFVWVAFLPTVTTPAL…
Pt-GPCR-A24	TRINITY_DN17099_c3_g1_i2	MASGGGAEGEEGGGGGGVVVDVVEEILLRCQQDILNALGNSDIRNGYLQN GNLTGTNASPEERLITDTHYYTDDPRISQGPGAPYEDTYMNPTSYPAATP TGHVFLEGYSICDHCNFTDTDLEVLLNSGTCTPSDFSSYMPLIYQMYACI FVIALLGNTLVLYTVAANRKMHTVTNLFIANLAVGDLLIMVFCVPFSVAS IIVLQYWPFGEVLCVFVNYSQAVSIFVSAYTLVAISLDRYLAIIYPLRPR MTRCQAKVIIAAVWFMALVTTLPIAVFSRLDPTDLRVYQWYGREVCREDW PNEMLRKYYTMSLMILQYFLPLLVLIYTYSRIACKVWGCRSTRFSHSGCN TQMTLVAAPETARGLLRTNASDHSPAKMIRMTLAVVLVYSLC…
Pt-GPCR-A25	TRINITY_DN16713_c0_g1_i1	MLLEEYSWFHTHPVVYKGVQGFKTPLGNPLQEQLEEEAVREVRYVAYGVV APIIVSVGMLGNILVIALLRLPQFKGVVFSFFTVLAVADLLSLGLCISPL HHALAGGTLHYSTAAWYSYFELLFVGTAMSTSVLIVVCITVYRFFSVCRP AEFQRVNTPRFPRISMAAALGTAVIAWLPMSFLRQPRLARECQGTSFTPP DNQTWWVACMIHDPSQKGYFIAYSWIRQVLVTFLPIVAVVTLNLFTLRGF LRHRKLRRRMLNHHSNQQPSSLSKSREEKYLMGLLIAVMSSFVITIVPSG IANAINTSTRTSELEFVIFSAVANNLEILNHTLNFYLYILCSKQVRDTLK EYYSRHRDSMAWMLDGFSLFSREVRSETSGGMEEGQRRQRRD…
Pt-GPCR-A26	TRINITY_DN19006_c0_g2_i2	MLSLGKTTYLDGNCSSAVDEAGPRWVIYQVVFPALVGVGVMANLLNLVVL SRPAMRGVAYRYLNHLAVSDLLYLLFNVPFCLEDFVRVSASGQAAGRSSA VYYAYVGVPLVNMFLTMSEYIVVWLSYDRCLAVCWPHKFSAKQRLRVVRE RCGLSLALTMAVYCLSPLSQTYQCEGAICCVIDSQYSHLGWFMGYELFRE IYSRFLPALLVTGFNVAIVVTLRRLHRERGAEDVINESRQERERRLFVLL VAVTVLFYVTAFPSAMYKVLPGADPRLESVLRPIADMLEVSGHVFNFVLY FLFSPDYRRTLVGMAAPPDKSRAGHPHFHSSSAIPL
Pt-GPCR-A27	TRINITY_DN18646_c0_g1_i1	MVAGGAATLPRASTGVATAWSRISGAARELGQGLPSPQALTDAGDLPTGG GPSLYGDGPASSFPSPSGGSEEGERNVTGGSGHRLLWSIYRASGVHRNES GRSGIEVRGGSDVQGSDQPLSAGYNLTVGGVLGESGGSVENVTSSVEDTK SHGLLDILMGSTPPLSERNVTHRNASVIKEALGFTLDSGGDVYTSPSETG GLQRLLLGRPEPVYLSALDDNLSVERPSFSTITNYTEPLFADYPPHLLDF AVFCCVLFIVLGVPGNLITIIALVKCKKVHNATGVFIINLTLSDLMFCVF NLPLAASLFGQCSWVHTGFVCLLFPILRYGLVAVSVFTVLAITINRYVMI AHPQLYNKVYTRAWLTVMVLSTWLGAFGALVPTLLELWGTFG…
Pt-GPCR-A28	TRINITY_DN18619_c0_g1_i1	MMSGGGNDWAQHLPLLEKYLPRESLLSILPNVSQENLELFVSLMRNDSGG ETAASVSPPLITDHAACDVGFRDGYKEVHGYLALMICVLGAFTNVLNMVI LTRREMINSTNTILTGLAVADFLLLIEYSFYAASYIKGQDSMFDSYVHSV FILFHAHYTQVTHTVAICLTITLAVWRYIAICKPHLNLVLCTLPRARLAV FIAYVISPILSVPNYLVYSIHQYSDEYNNASLYHVDFSERSKAYNSLLQR INFWFHSVLIKIIPCLLLTVLIYHIIRAMYIAKRRKENLIKMGTPSMEAE RKLPRMEKLTEKTTRMLLTVLLLFLATEMPQGVLALLSGIYGRSFFMQCY LHWGEVMDLLALINSAVNFLLYYIMSHQFRVTFRCLLYPPPP…
Pt-GPCR-A29	TRINITY_DN14976_c0_g1_i1	MEASESPSLLEEVLTSSESDQLDSLIFGNFTNLSNNLSWLFNVSDGLNIN IDLINKFQRNRRVDDVAYYALIAMYSVLIVLGSTGNSMVVAAVIRQPAMR TARNVFIINLAISDLLLCLVTMPLTLVELLSQYWPLGDQPFLCKLVGTLQ ATSIFVSTISITAIALDRYQVIVYPTKQSLKTVGAVLLLLLIWAVAFILA LPNFIWRTHRHHVINLPGLYSVNFCFEEWPTKHGGGYYSVFVMLVQYCLP IVTVSVAYAMICRKLKFRLTKSNVRSSRRSERDDRRMKKTNTLLIAIALV FCLSWLPLNLYNLIVDFYNPFGEDLETMLVVYAVCHMMGMSSACSNPLLY GWLNDNFKKEFLEIINILLPGRCKVSATPRGEVTKLPSGSQG…
Pt-GPCR-A30	TRINITY_DN10810_c0_g1_i1	MDHTLHDFQLDGAEVSWDNASDGSGSATNESEYDYDYETALDTFFWSQLA PPLAVYAATYVVGVAGNGLIIFTICRFRRLKTTTNVFLASLASADLLLIL LCIPVKIARLFSYSWTMGYVLCKLIYYMQALSALCSVLTLTVLSLERCYA IVYPMRAMYVCSLTKARRATVIIWAASL
Pt-GPCR-A31	TRINITY_DN6774_c0_g2_i1	MGEAEMGALVNSTPSSILALTPTESHLSTFLMPTATHDHGINGSLLSAGG NDSLVEEVEGEGDQLVHGMTMTVMMTVIYFLITVTGVLGNVATCIVIVRN RIMHTATNYYLFSLAISDLLLLAFGMPDEIYMLWRGRPYIFGAYFCFVRG FTAEISTNASILTIAAFTVERYIGICHPLRSQTMSQLGRVVRSIAVIWGV AIACAVPIAIQYGIVYENHLPSGEEDPNSSACLIKNPIYLAFEISTV
Pt-GPCR-A32	TRINITY_DN19231_c0_g3_i1	MMASTSLPVLVSSPAEDPENLSSVYECSQDSGLTANLSQFEYPYRMKTWV PITWREILKVATYLIVFLVSLVGNLLVMLVVCYNRHMRSSTNQYLVNLAA ADLLVTLVCMWVHIVRHLSYPHYVLPAYVCKLDGFVQTTTLLASVLTLTV ISVGRFVAVMFPLHARTSPDRANRVIAAVWIASALIACPILFYRKLYSIQ WANFTTWQCDEFFPTEKEYVEDEGRCEVIYDAKNLFYTILIIALFFLPVA IMIINYSLVVWTLWGAKQPGEQQSAATRNMATKAKKRVVKMVTVVLLVFV ICWTPLLTLILFSLNHQGHLPEWFSSLEFAAYFIAYSNSALNPIIYCGFN TSFRQGLVALLSCRHAATGRIYHRRHWMGMTGGTRDTTMGCS…
Pt-GPCR-A33	TRINITY_DN9397_c0_g1_i1	MVADRVGRRRQAGPTPSPLLLHLYLFLVNVLLHFCFTSAARLESVNPDGS CASGWFLCTSTGDVCLEQRFLCDQKEDCPDGEDEIDNCVPYEADSNLTVK ILEKEILAPDNITRCDLTRVPPECYCRLGTHLVCRNAHLTSIPQDLDPNV TSLLLGNNSIVLSSDDLQRYPRLNQIFLDHNKITVLPAGVFSGLPLLKVF LSHNLLSDDPQSLQGLSSLFRPSYLHLCNNLISDIDLVLDLVPGLLSLWI NYSPVTMTNRTVSRNAQSLTELWMEGNRVQLTSGAFRGFTNLESLYLRYN GITEVGSGAFEDLRSLKDLELNYNLIRHLQSDSFVGLETLVSLNLDHNPL LTIHANAFKPLENLASLWMGSVEMSTELLMNISTHLRDETHP…
Pt-GPCR-A34	TRINITY_DN18679_c0_g1_i1	MEENVTLDEAVCGDNFTLDGNITANTSMEPHHHLNVSGQYPLDLAVPLYG YAMPVLLLVTTVANTLIVAVLWQPHMRSPTNAVLMAMALSDMLTVLFPEP TFFYMYTLDNHAKPLHPPAACYAWYVLHEPIPNMFHTASIWLTVLLATQR YISVCHPSLAPRWCTQNIVTWAIVWVFFFAAIHQTPRVFENHYESMQIEW EGQCVWVCRVTYNSWVTTIKIDVYYPIYFWFRVVFVHLGPCTVLVVLNVL LFKALKEAQKRRKKLLNEKSSSKECRRLRDHNTTLMLIVVVSVFLVTEIP LAVITVLHIMSNSGLNIFSEQSYDSVMRFFIISNSFIIFSYPINFAIYCG MSRQFRETFRDLFVRGGSQSWRRMDSTRDSRGSMYNGPPRNC…
Pt-GPCR-A35	TRINITY_DN16349_c0_g1_i5	MDQLEATPTPGLSVAITIMTTLLNATLEDYPSPCLDACNASASASSSTAT DADHHGSNETEKYCNSRSWTDFRESYQPVHGCMSLVVCVFGSVANVINMV VLTRRSMVSPTNAILTGLAVTDLLVMVEYIPYTMHQYVWQWSSLTARFSW GWAVFILFHAHFGQVFHTISIGLTVTL
Pt-GPCR-A36	TRINITY_DN15999_c0_g1_i2	MELIAEPILDLESSANATSVLTAAHDWWNNTDVNLDVHMNCSRTFCPTDN FTNGTCVECLPDDVGNKYNLPWWNELIWYVVFMGMVIVATGGNTIVIWIV LADQRMRTVTNIFLVNLSVADAMVSTLNVVFNFTYMLNLNWRFGFVYCKI SQFVSILSICASVFTLMAISFDRYIAIMHPLRPRMGRKATILIVVWIWVS SVCLSLPNLIYFTTATLSYAGGERIVCYAAWPDGDQGESQSEYVHTVVLM VLTYILPLTCMGFTYVRIGLTLWGSRSIGEQTPRQVESIKSKRKVVKMMI VVVTIFAVCWLPYHMYFILSNLMPEIAHYEFIQETYLAIYWLAMSNSMYN PMIYCWLNNRFRNGFKRVFSLCLRGLRYD
Pt-GPCR-A37	TRINITY_DN14439_c0_g1_i1	MEDNDKDKLGDKAVQAGGGSGSSGGGNGGGEGWPALLMECVLQAWPELNA THSLPVPSHTLSNTSHTFFFDHDFYRRLLNLSESGELNGTEAGGLSRERL EQCLAPPPADRPYLLPWWQQLTWTLAFGAMLLVAVGGNAIVMWIVIAHRR MRTVTNYFLVNLSAADLLMAIFNCIFNFIYMLHSDWPFGAVYCTISNFMA NVTIAASVFTLMAISFDRYIAIVRPLKPRMSKSEARHFIIFIWLSSMSLA VPCLLYSTTVSIKYKNDEIRRGCFLLWPDGQTSISYREYVYNIVFFATTY VLPMLVMLVSYTLISCELWGSHSIGELTDRQASSIKSKRRVVRMFIVIVV AFMLCWLPQQGFFLYQYHNSQVLDSAHIQHIYLGFYWLAMAN…
Pt-GPCR-A38	TRINITY_DN24806_c0_g1_i1	MMTMAVGGNILVIWIICAHRRMRTVTNYFLLNLSAADLFMSVLNCMFNFI YMLHSDWPFGTVYCTISNFMANVTISASVFTLMAMSFDRFIAIVRPLEPR MSKTVARVFILVIWGSSMLLSLPCLLFSTTVSIKYKNNEVRRGCILRWPD GLTSSSRQEHIYNVVFFITTYLMPMLVMLWSYFRIGQELWGSQSIGELTE RQATSIRSKRRVVKMFLVIVAVFAVCWLPQQAFFLYTYHNSAVLDTAHIQ HVYLTCYWLAMANAMINPVIYYWMNARFRAYFREVVLQCVCLQCHRRSPS YEGSPTLERRHVPCEDPSSRSRSDTRQGPNGTFRTTPAS
Pt-GPCR-A39	TRINITY_DN15671_c0_g1_i1	MPWSFVDTDDSGAFSLTANTTNGWSGTSKESNEDLLLGSSDNQSTVDEEA GVGNSSGGAGVSARDESLVVWEIVTLLAIFVLTVLGNVVVLFMLLVRRKK LTRMCYFILSLCVSDLVTAFLNVLPQLVWEITYRFRGGGFLCKAVKFAQL LGPYLNSYLLVMTALDRYQVICYPLSNCAWTPRRSKNMIYLAWALALGSC TPQVFVFSYQEVGDGTWDCWASFIPPWGPRAYVTWYALSVFILPLFFLII VYTCICRTLWVNFKHKQMDEQRHRWHDLRRPRLLVRLRTQGNRSDGGEVS TCLHSPQQEKIIPLLDSNSSTSTSTVHRLPAKKMTRASCMRIPSATNPRS HSIRSISRAKIKTVKLTVTVIFCYVSCSAPFISVQLWHVWDP…
B-family GPCRs
Pt-GPCR-B1	TRINITY_DN18808_c0_g1_i2	MRSRVLLSLVTLLSLSLATVSTNWERPLSLRDAWQASSLSIPCTTAPSKI HVPNWMKEKEEVLVGDEEEEEGEEFEEEELSETWKEFVSWKTFKEDFQRQ GKVGKAKGRNEKKEEKEREDRKEGEEEVVTMKNKVKSNGKENDDIRGRHD KITVKKKKAFEEVKEKGKDEGGNVELIFQHYEDYLQDFAAEEEEEQEEEE EEEVDKEVEMEGEENISSNSSHSLAHFFPKFLPPILSEQDLKEIRSPLCR SKERYLPPDLFHLDTCALCYHHLVNKDVFASKWRIQKVARKAPLGRKDNG TMGEGGGGGGGEPLERKQTRLEEAFTFLLHVLVDPDNENVTLEAQMSSSA LLESFKGEEGRDKWKKCCKEAVSCCTWMLSASWPAGFCPNTW…
Pt-GPCR-B2	TRINITY_DN19377_c0_g7_i1	MLSVRIKHLVFVMAWWWWWWSGQCHAIKTTMTTPSTELPSCRMGYSSQEY YPTEAGYYNHQTCFFCYHFVPRHRRKVDLQVDHVAVTLSDGRTLADFIFR VENATYHFDPEDEEAWQLVVESLVDEVEGRKLADCCFEAVTCCNETLSRP KGDPSHCPATWDGWHCFGPTPPGTSVSFTCPHYAYRGLPECALEGHKHCQ ADGNWTVDEKGAEITDYSTCSHHHHHLLLYSWEAATHAISLLALPPALFV LLYYRQLRVQRFLLHVHLFVALLGKALFNFIDNLALRIPEYKEDASQLDE NTVACRILVFFAKGFNLAVWTWMLAESLYLHRLIVAAFRGGGKTWVYVLV GWVPALVVALCWAAGKAVLEDAECWLGHDPSTSHQLHLIFDI…
Pt-GPCR-B3	TRINITY_DN10271_c0_g1_i2	MSCHLCMEDSVVVSATPLLLTQTSTASQRSLQQLSGEGLRCLQDVWNATW MEGVFCNASWDTLHCWPPTPAGRIVKESCANVFSDVPALLDYPDAVAYRE CGLSGTWLLGGWTNYSQCLNVIEQQAGPSHVLEAVRYITFIGGLLSLFTL TATIFIFSHYRALECDRLRVHRNLVAALIIRFLVMLVLTEPFVSRRSSYT YRDVDWLCKTLLALRMYAQMASINWMFVEGLFLHSRLTSNVFHSRAPFPL YYTIGWGAPLAFIVAWATTMALQHPAHCWRGYSTLSYVWILVGPMVAALM VNLVFLVNIIRILVTKLRANDTLETEKISTRGHTPQYQSSKATRVHHRFK REPSQYHHTLRQQHLPNNNSLQPEQKHSVLEEGRLHRNRSCH…
Pt-GPCR-B4	TRINITY_DN18069_c0_g4_i1	MEGNATDADLGWEERGLNSSLSSAEEGDRLFMTDPEVERRKEECDELHAQ IPLPDPALGPYCPRTFDGWACWNDTPANSRVHAPCPDFIPGFDPSLLAYK DCDSNGTWFKHPDTNEPWSNYTTCVDSNQLGLMQSVNSLYIAGYSISLIA LCCSLFIFCFFKSLKCKRVTIHKNLFVSFIINNAMWLIWYKCVVEDTNVL FKNTGLCQTLHVFLHYFLVSNYFWMFCEGLYLHTLLVVAFVAEDRIMKWF FLLGWGIPAVLITFYAIFRGISKEENKHCWMSEGPYNHILNVPVVLSMLL NLFFLINIVRVLVTKLRAVNTGPDTHSTRKAVRATLILIPLLGLHYILVP FRPPEGSPGHGVYLIVSAIAASFQGLGVSLLFCFFNGEVLGI…
Pt-GPCR-B5	TRINITY_DN18211_c0_g4_i1	MWNRFMEQSTVIVNATDDGQKVLSCFDQFIASILESKDGGPAAGSCPVKF DGVSCWPQTPPGTLRIIPCFDVFNGVYYDPSENNATLYCYANGTWSSRSF YDYCLNAITNPPGTHAGTSISTIQTTFYVGNSLSLAAVALALWIFISFKD LRCLRNTIHTNLLFTYLLHNLFWIIYASVKGLVAWSVGCGFFVTLNYFTL TNFMWMFVEGFYLYMLVVKTFSVENIKLRVYILIGWGIPVPIVALWVILK SQLAASHEGSELEVVAMAGQELEGLIRTCPPMPASHFDWLHKVPVLVVLS LNLLFLAHIMWVLITKLRSANTVETQRYRKATKALLVLIPLLGLTYMLLI ALPQELEHVRAVLLSTQGFWVALFFCFVNSEVQNSIRHHIER…
Pt-GPCR-B6	TRINITY_DN18816_c3_g2_i1	MRHECEVKMKNERQGMRVGRTGALVKSPTTTTTTIPHTGTFRASSSTNTN TNTALNDPLQPPGSVKWEENEELAEGDEAEIENFDRVLENVKETESWDGH CPTTFDNIYCWPKTAPNTIVAIPCPSYVKNFMRGSEATRYCTSQGTWFSL EGNNKSWTNYSQCSATLVVPIVVNSTLEMWVPVVRVVSLIGYSVSLATLL VAFSVLACIKHLRCPRNTLHMHLFLSFICRAVGALARNNDISGVTPQQPH SDGGTWGCRLFTSLWQYFILANYSWILMEGLYLHNLIFLALFTDNSAITL YIVLGWGLPLILVVGWAVARMTAENTLCWFTNAKPWLFWTFIRGPVGVSI LVSFALFLNIARELLLKLKSSTAPETRRCRYRRWARSTLVLV…
Pt-GPCR-B7	TRINITY_DN20475_c0_g1_i1	MRAWEFTSLDQCVSYYQDQMQDGWCNATWDKILCWPPSPPDTVGRLPCPP LKGVDPSQVAQRKCTSAGHWEGRTLAEGLAGGWTNYTPCLIPEIRILMDK LYAKSKEDAQLKLQVAEVSRVIETVGLSLSLASILVSLAIFSYFRSLRNN RTKMHFNLFVAMVIQLMVRLTLYIDQYITRKTQQRTTGIDNTPVLCEGVY VLMEYARTAMFLWMFLEGHYLNSMLTVAVFTDHPNYMVYNLLGWGLPVVM TAVWAAVTAVQHTGTECWWGYNLSPYFWILEGPRLTVIITNFLFLLNILR VLITKLQASVSSETQQAKKAVRAAIVLLPLLGITNSLQMVHSPLEGNIVE FAAWSFVTTFLTAFQGFFVALLYCFLNQEVRNAIAKSLANLS…
Pt-GPCR-B8	TRINITY_DN20478_c0_g6_i1	MTHSIFLQACVDSFQHVNLSAHERWCNATYDMVLCWPPTPAGESAQLPCP PVKGVDPSQMVYKRCDISGRWAGKTDGDFTRPQGYTNYIVCFTKPIQEVL RKLYNDSAEDAQTKLNIALGTRIMEIIGLSLSLASLCISLAIFFYFRSLK NNRTRIHRNLFVAMVIQVMIRLVLYIDQAIIRGHIVGYSATNTNTSRQGI DNTPMLCEASYVLLEYARTAMFMWMFIEGLYLHNKITVTVFQHKFYYSVY HAVGWGVPVLMTAAWATATAMHYGSSRCWWGYNFTSYFWILEGPRFSVIS LNMVFLLNIIRVLVTKLRQSNSSEALQVRKAVKAAIVLLPLLGITNVLNM IVAPLGRSAAEFGLWSYATHFLTSFQGFFIALLYCFLNGEVR…

## Sheet: GPCR-A phylogenetics
Name	NCBI Identifier	7TM sequence
Ae-RFamide-R	EGI68605.1	SVSAICSVVTLTAMSIERYYAIVHPMRAQYICTISQARKIVIITWIAAFLLGIPMTFTQTHKEVGVRRIAYWCVRNSEAGLLWRSHEVYMLIVVLVLPLIIMAFCYTSICWEIWRVMKRRYHMTSRHALNPNSADTESIPMTQRQGGNERKSRRDEKDEESRTMKQVVKMLVAVVVLFAICWAPMLIDNVLTAYGYLPRVKSGVHKHLNTAFQLMAYFNSCINPIVYGFMSKHFRENFLSAACGGWWIFC
Bm-GPCR-A15	NP_001127712.1	IVPILFALIFVIGVVGNGTLVAVFVRHKAMRNVPNTYILSLALADLLVIITCVPFTSIVYTVESWPWGRTVCQVSEAAKDVSIGVSVFTLTALSADRYFAIVDPLRKLHATGSSKRATRLTIATAIGIWILAGLLATPAFIGSYLRPFVVNPTTQFLVCYPYPQEWGEHYAQIVVMVRFLLYYSLPLAVIALFYVLMAWHLVLSTQNMPGEMQGTQRQMRARRKVAVTVLAFVLVFAACFLPSHVFMMWFYFCPTAENDYNGWWHGLRIVGFCLSFLNSCVNPIALYC
Bm-GPCR-A2	NP_001127737.1	ILSIILAVIMILSLIGNGCTCAVIARNRSMRTPTNCYLFNLAITDLFMALFVPIDIYIIWIPEFYPLGEVGCRLHFVLWDCLSNCSLLIITAFTVERYLVITRPFLRQKLSLNSRVFKLVGVIWFVSCSFCIPDLLYIDMIEEKKYVFCYVAMSHIVSVFVAAEIFVFYVIPMTIIIILYILITIELKFKKKLRSSPASNGQQNRDKAVIMLAAVALSFFLFWSPYCYLRIMLIWPGVYEKHYNAWKIVNYLCYNSYASSALNPILYSLM
Bm-GPCR-A24	NP_001127722.1	LWTVLFAGMVVVATVGNLVVIWIVLTNKRMRSVTNYFLVNLSVADAMVSTLNVTFNFTYMLNSNWPFGHFYCKFCQFIAVLSISASVFTLLAISVDRYVAIMSPLQPRLGKRATLGITAAIWAWSSFISSPNLIYFTTENVSLPDGTIRCVCYSHWPDGMTTRSRLEYAYNVLFMVLTYFMPIIAMTYAYSRVGVELWGSQSIGECTQRQLDNVKSKRRVVKMMIVVVVIFAVCWLPFHVYFVVTSYYPDVVSYPHIQEIYLGIYWLAMSNSMYNPIIYCWM
Bm-GPCR-A34	NP_001127750.1	MILVGVSGIFLNCVILTILIRNKWLWSPSNCLIGNMALIDFLLLFFCPWFMLVRDFFQNYVLKTFGCRFEGFLQASLLLASVGAVMLVSYDRLAAAVLTAEARITKDAAPKVIVITWIVSSALALPWTIKRKYVERQWLNYLETFCAEDVQLLGIYWHLLLTMLVWVPLGIMIITYGVIMWRLQWSARALSSRGGGRSVTRAKGKAMRIAALVLIAAVVCRIPYTALLYWRNNLPPKINSVDGSFSIMWFAANYLMYLNCTINPLIYGF
Dm-AKH-R	AGB92685.1	TVYSILFVISTIGNSTVLYLLTKRRLRGPLRIDIMLMHLAIADLMVTLLLMPMEIVWAWTVQWLSTDLMCRLMSFFRVFGLYLSSYVMVCISLDRYFAILKPLKRSYNRGRIMLACAWLGSVVCSIPQAFLFHLEEHPAVTGYFQCVIFNSFRSDFDEKLYQAASMCSMYAFPLIMFIYCYGAIYLEIYRKSQRVLKDVIAERFRRSNDDVLSRAKKRTLKMTITIVIVFIICWTPYYTISMWYWLDKHSAGKINPLLRKALFIFASTNSCMNPLVYGL
Dm-ASTA-R-1	AAG22404.3	VPVFFGIIGFAGLLGNGLVILVVVANQQMRSTTNLLIINLAVSDILFVIFCVPFTATDYVLPEWPFGNVWCKFVQYMIVVTCHCSVYTLVLMSFDRFLAVVHPVTSMSLRTERNATLAIMCAWITIVTTAIPVALSHSVRIYQYHGNAGTACVFSTEEEIWSLVGFQVSFFLSSYVAPLTLICFLYMGMLARLWKSAPGCKPSAESRKGKRRVTRMVVVVVLAFAICWLPIHVILVLKALNLYGGSHLSVIIQIISHVVAYTNSCINPILYAF
Dm-ASTA-R-2	AGB96422.1	IVGFFFGVIAITGFFGNLLVILVVVFNNNMRSTTNLMIVNLAAADLMFVILCIPFTATDYMVYYWPYGRFWCRSVQYLIVVTAFASIYTLVLMSIDRFLAVVHPIRSRMMRTENITLIAIVTLWIVVLVVSVPVAFTHDVVVDYDAKKNITYGMCTFTTNDFLGPRTYQVTFFISSYLLPLMIISGLYMRMIMRLWRQGTGVRMSKESQRGRKRVTRLVVVVVIAFASLWLPVQLILLLKSLDVIETNTLTKLVIQVTAQTLAYSSSCINPLLYAF
Dm-ASTC-R-1	AAF49259.2	VVLYGFVCIIGLFGNTLVIYVVLRFSKMQTVTNIYILNLAVADECFLIGIPFLLYTMRICSWRFGEFMCKAYMVSTSITSFTSSIFLLIMSADRYIAVCHPISSPRYRTLHIAKVVSAIAWSTSAVLMLPVILYASTVEQEDGINYSCNIMWPDAYKKHSGTTFILYTFFLGFATPLCFILSFYYLVIRKLRSVGPKPGTKSKEKRRAHRKVTRLVLTVISVYILCWLPHWISQVALIHSNPAQRDLSRLEILIFLLLGALVYSNSAVNPILYAF
Dm-ASTC-R-2	AAZ66058.2	LYALVCIIGLFGNTLVIYVVMRFSKMQTVTNIYILNLAIADECFLIGIPFLLYTMQVGNWPFGNYMCKAYMVSTSITSFTSSIFLLIMSADRYIAVCHPISSPRYRTPFVSKLVSAFAWMTSVLLMLPVILFASTVQSSNGNVSCNIEWPDTQNSHTDSTFILYSLVLGFATPLTFILVFYCLVIRKLHTVGPKHKSKEKKRSHRKVTKLVLTVISAYIFCWLPHWISQVALISSAPQRCASRLELAVFLACGCLSYSNSAMNPILYAF
Dm-Capability-R	AGB94868.1	TFSELNASFTNTPDTLFATSVSSDPSHGFGEEDYACGTFNCSPKEFVAFVLGPQTLPLYKAVLITIIFGGIFITGVVGNLLVCIVIIRHSAMHTATNYYLFSLAVSDLLYLLFGLPTEVFLYWHQYPDLFGMPFCKIRAFISEACTYVSVFTIVAFSMERFLAICHPLHLYAMVGFKRAIRIITALWIVSFISAIPFGLLSDIQYLNYPLDHSRIEESAFCSMSPKIVNEIPVFEVSFCIFFVIPMILIILLY
Dm-CCK-like/Sulfakinin-R	AAF48879.3	IPSYSMILLFAVLGNLLVISTLVQNRRMRTITNVFLLNLAISDMLLGVLCMPVTLVGTLLRNFIFGEFLCKLFQFSQAASVAVSSWTLVAISCERYYAICHPLRSRSWQTISHAYKIIGFIWLGGILCMTPIAVFSQLIPTSRPGYCKCREFWPDQGYELFYNILLDFLLLVLPLLVLCVAYILITRTLYVGMAKDSGRILQQSLPVSATTAGGSAPNPGTSSSSNCILVLTATAVYNENSNNNNGNSEGSAGGGSTNMATTTLTTRPTAPTVITTTTTTTVTLAKTSSPSIRVHDAALRRSNEAKTLESKKRVVKMLFVLVLEFFICWTPLYVINTMVMLIGPVVYEYVDYTAISFLQLLAYSSSCCNPITYCFM
Dm-CG30340	NP_724812.2	FLPLIAFGLYGNFSMVYVIATNRSLRSPTNLIIANMAVADLLTLAICPAMFMVNDFYQNYQLGCVGCKLEGFLVVVFLITAVLNLSVVSYDRLTAIVLPMETRLTIRGVQIVVVCTWVSGILLASPLAFYRSYRVRVWKNFTERYCKENTSVLPKYWYVLITILVWLPLGIMLICYIAIFYKLDRYEKRVLSRENPLTVSYKRSVAKTLFIVVVVFAALRLPFTILVVLREKYFGEDVSVSSGMQLFWYISQYLMFLNAAVNPLIYGF
Dm-CCHamide-R-1	AAF57819.3	IVPILFALIFVVGVLGNGTLIVVFLSVRQMRNVPNTYILSLALADLLVIITTVPLASTVYTVEYWPYGSFLCSLSEFMKDVSIGVSVFTLTALSGDRYFAIVDPLRKFHAHGGGRRATRMTLATAVSIWLLAILCGLPALIGSNLKHLGINEKSIVICYPYPEEWGINYAKSMVLLHFLVYYAIPLVVIAVFYVLIALHLMYSASVPGEIQGAVRQVRARRKVAVTVLAFVVIFGICFLPYHVFFLWFYFWPTAQDDYNAFWHVLRIVAYCMSFANSCANPVALYFV
Dm-CCHamide-R-2	ACZ94340.1	TVLYTLIFIVGVLGNGTLVIIFFRHRSMRNIPNTYILSLALADLLVILVCVPVATIVYTQESWPFERNMCRISEFFKDISIGVSVFTLTALSGERYCAIVNPLRKLQTKPLTVFTAVMIWILAILLGMPSVLFSDIKSYPVFTATGNMTIEVCSPFRDPEYAKFMVAGKALVYYLLPLSIIGALYIMMAKRLHMSARNMPGEQQSMQSRTQARARLHVARMVVAFVVVFFICFFPYHVFELWYHFYPTAEEDFDEFWNVLRIVGFCTSFLNSCVNPVALYCVS
Dm-FMRFamide-R	AHN57950.1	EFWVCGVLINIVGVLGILGNIISMIILSRPQMRSSINYLLTGLARCDTVLIITSILLFGIPSIYPYTGHFFGYYNYVYPFISPAVFPIGMIAQTASIYMTFTVTLERYVAVCHPLKARALCTYGRAKIYFIVCVCFSLAYNMPRFWEVLTVTYPEPGKDVILHCVRPSRLRRSETYINIYIHWCYLIVNYIIPFLTLAILNCLIYRQVKRANRERQRLSRSEKREIGLATMLLCVVIVFFMLNFLPLVLNISEAFYSTIDHKITKISNLLITINSSVNFLIYIIFG
Dm-GPA2/GPB5-R	AAN13752.1	SVWIVVALAVVGNVAVLTVILSIRPESTPVPRFLMCHLAFADLCLGLYLLLVACIDAHSMGEYFNFAYDWQYGLGCKVAGFLTVFASHLSVFTLTVITIERWLAITQAMYLNHRIKLRPAALIMLGGWIYSMLMSSLPLFGISNYSSTSICLPMENRDVYDTIYLIAILGSNGVAFSIIAVCYAQIYLSLGRETRQAHQNSPGELSVAKKMALLVFTNFACWSPIAFFGLTALAGYPLINVTKSKILLVFFYPLNSCADPYLYAIL
Dm-Leucokinin-R	AAF50775.2	SIFYGGISIVAVIGNTLVIWVVATTRQMRTVTNMYIANLAFADVIIGLFCIPFQFQAALLQSWNLPWFMCSFCPFVQALSVNVSVFTLTAIAIDRHRAIINPLRARPTKFVSKFIIGGIWMLALLFAVPFAIAFRVEELTERFRENNETYNVTRPFCMNKNLSDDQLQSFRYTLVFVQYLVPFCVISFVYIQMAVRLWGTRAPGNAQDSRDITLLKNKKKVIKMLIIVVIIFGLCWLPLQLYNILYVTIPEINDYHFISIVWFCCDWLAMSNSCYNPFIYGIY
Dm-Pyrokinin-R-1	AFH06407.1	TVVYSLIFITGVVGNISTCIVIKKNRSMHTATNYYLFSLAISDFLLLLSGVPQEVSYIWSKYPYVFGEYICIGRGLLAETSANATVLTITAFTVERYIAICHPFLGQAMSKLSRAIRIIVLVWIMAIVTAIPQAAQFGIEHYSGVEQCGIVRVIVKHSFQLSTFIFFLAPMSIILVLYLLIGVHLYRSTLVEGPASVARRQQLKSVPSDTILYRYGGSGTAMSFNGGGSGAGTAGLMGGSGAQLSSVRGRLNHYGTRRVLRMLVAVVVCFFLCWAPFHAQRLIAIYAPARGAKLRDQHEFVYTVMTYVSGVLYYLSTCINPLLYNIM
Dm-Pyrokinin-R-2	AAN13555.1	SVGYALIFIAGVLGNLITCIVISRNNFMHTATNFYLFNLAISDMILLCSGMPQDLYNLWHPDNYPFSDSICILESVLSETAANATVLTITAFTVERYIAICHPFRQHTMSKLSRAVKFIFAIWIAALLLALPQAIQFSVVMQGMGTSCTMKNDFFAHVFAVSGFLFFGGPMTAICVLYVLIGVKLKRSRLLQALPRRCYDVNRGISAQTRVIRMLVAVAVAFFICWAPFHAQRLMAVYGSTSGIESQWFNDVFSILDYTSGVLYFLSTCINPLLYNI
Dm-RYamide-R	AHN57552.1	YIPIFIFALIGNGTVCYIVYSTPRMRTVTNYFIASLAIGDILMSFFCVPSSFISLFILNYWPFGLALCHFVNYSQAVSVLVSAYTLVAISIDRYIAIMWPLKPRITKRYATFIIAGVWFIALATALPIPIVSGLDIPMSPWHTKCEKYICREMWPSRTQEYYYTLSLFALQFVVPLGVLIFTYARITIRVWAKRPPGEAETNRDQRMARSKRKMVKMMLTVVIVFTCCWLPFNILQLLLNDEEFAHWDPLPYVWFAFHWLAMSHCCYNPIIYCYM
Dm-SIFamide-R	ACZ94970.1	AYIVVFLVGLIGNSFVIAVVLRAPRMRTVTNYFIVNLAIADILVIVFCLPATLIGNIFVPWMLGWLMCKFVPYIQGVSVAASVYSLIAVSLDRFIAIWWPLKQMTKRRARIMIIGIWVIALVTTIPWLLFFDLVPAEEVFSDALVSAYSQPQFLCQEVWPPGTDGNLYFLLANLVACYLLPMSLITLCYVLIWIKVSTRSIPGESKDAQMDRMQQKSKVKVIKMLVAVVILFVLSWLPLYVIFARIKFGSDISQEEFEILKKVMPVAQWLGSSNSCINPILYSV
Dm-Tachykinin-like-R	ABW08638.1	WAIIFGLMMFVAIAGNGIVLWIVTGHRSMRTVTNYFLLNLSIADLLMSSLNCVFNFIFMLNSDWPFGSIYCTINNFVANVTVSTSVFTLVAISFDRYIAIVHPLKRRTSRRKVRIILVLIWALSCVLSAPCLLYSSIMTKHYYNGKSRTVCFMMWPDGRYPTSMADYAYNLIILVLTYGIPMIVMLICYSLMGRVLWGSRSIGENTDRQMESMKSKRKVVRMFIAIVSIFAICWLPYHLFFIYAYHNNQVASTKYVQHMYLGFYWLAMSNAMVNPLIYYWMN
Dm-Relaxin-R	ADC34816.1	VWVMASIAVVGNLLVLLGRYFYKSRSNVEHSLYLRHLAASDFLMGIYLTLIACADISFRGEYIKYEETWRHSGVCAFAGFLSTFSCQSSTLLLTLVTWDRLMSVTRPLKPRDTEKARIVLRLLLLWGISFGLAAAPLLPNPYFGSHFYGNNGVCLSLHIHDPYAKGWEYSALLFILVNTLSLIFILFSYIRMLQAIRDSGGGMRSTHSGRENVVATRFAIIVTTDCACWLPIIVVKLAALSGCEISPDLYAWLAVLVLPVNSALNPVLYTL
Dm-LGR3	AAF56490.2	YSAWVMATLTIAGNVLVLWGRFIYRDENVAVTMVIRNLALADMLMGFYLVTIGVQDYRYRNEYYKVVLDWITSWQCTLIGTLAVSSSEVSMLILAFMSLERFLLIADPFRGHRSIGNRVMWLALICIWITGVGLAVAPVLLWRTSTLPYYGSYSGTCFPLHIHEAFPMGWLYSAFVFLGVNLLLLVMIAMLYTALLISIWRTRSATPLTLLDCEFAVRFFFIVLTDFLCWVPIIVMKIWVFFNYNISDDIYAWLVVFVLPLNSAVNPLLYTFT
Dm-LGR4	AHN59662.1	VWVMASIAVVGNLLVLLGRYFYKSRSNVEHSLYLRHLAASDFLMGIYLTLIACADISFRGEYIKYEETWRHSGVCAFAGFLSTFSCQSSTLLLTLVTWDRLMSVTRPLKPRDTEKVRIVLRLLLLWGISFGLAAAPLLPNPYFGSHFYGNNGVCLSLHIHDPYAKGWEYSALLFILVNTLSLIFILFSYIRMLQAIRDSGGGMRSTHSGRENVVATRFAIIVTTDCACWLPIIVVKLAALSGCEISPDLYAWLAVLVLPVNSALNPVLYTL
Dp-RPCH-R	ACD75498.1	YSVLLIISVCGNITVLVNLIKRRHISNPRVNIMLTHLAIADLLVTLLLMPIEIGWAATVQWRAGDFSCRMLAFFRTFGLFLSSFVLVCISIDRFGAILQPMKLDYWKRRGRFMLAIAWACSVICSLPQVFVFHVKAHPEYPWYEQCVTFDSFPTKAHEISYAAFGMMMVYVLPLAVFVFTYSSILCEISRRSKEAVGQEEGIRRVTVGTLGRARIKTVKMTLVIISVFIFCWTPYNIMSIWFWCDRDSALQVDQRIQKGLFLFACTNSCFNPMVYGYFS
Dp-Sulfakinin-R	EFX77608.1	IFLLGITGNVLVILTILQNTRMRTVTNMFLLNLAISDLLLGVFCMPFTLIGQLLRDFIFGDVFCRLISFFQAVSVSVSGWTLVAISVERFYAICHPLTSRKWQTRSHARYIILAVWLGSLAIMSPVAVLSQLKPVGNDGRRKCREVWPDDTLEKSFTVFLDVILLIIPLFLMVAMYGMIVNHLWKVDQGLPATPSLRRCNPEHCLKTKRRVLKMLIVVVLEFFICWTPLYVVNTMSFFAPRALYEGLGYTGISLMQLLAQASCCCNPITYCFMSSSFRRAFVKAFGCSKAENFSRSVGTV
Dp-Vasopressin-R	ADK27313.1	STLSVILVLAVTSNLTMLIAIWRQRRNRPLSRMYFFMMHLSLADLLVALFNILPQLAWDITYRFQGGDVLCRFVKYAQVMTLYLSTYILMFMAVDRYRAVCCRNLHWNSLKVAKCFVAASWVMAILFSIPQAVIFHEEEISVGVTDCWVQFVEPWGAKAYVTWFVVSIFGAPLLVIGVCYGVICRQIWIYSQSALPSSQQPPTSSAYPALTSETGSTLSVMRRWILRASLRWQKSRSSSNNGTKNHSAIANTSQLSDTIPMRSLATQPASNPLSAEAKVIRSLPPPLSPQCCQQMPLRRSNSNQNRITKAKMKTIKLTLAVVLCFVACWAPFCITQLIMVYCPPTSQADVSPVAVIILLLASLNSCSNPWIYLA
Nl-ACP-R	Nl_GPCRA31	ATYGFLFIIAAIGNVTTLFSLLRSRHRQSRVSLLLTHLVIADLLVTFIMIPMELAWRVTVQWVAGNAACKLFLFLRAFGLYLSSNVLVCVSLDRYFAVVYPLRVTDARKRGKCMLTAAWLVSFCSAVPQSVVFHVERHPDFSDFKQCVSFNYFSTPAKETTYNIFCVLAMYFVPLCLISFAYLRIFIEITRKSCDNATEPTTAAANGDCCKMAAPPVTPQLVANLRQQTTRRMQLRRSDPTQIERARTKTLRMSLTIVAVFFWCWTPYVFMTVWYMVDRSSASQFNPRLQDFFFVMAVSNSCMNPLVYGSYN
Nl-AKH-R	Nl_GPCRA32	IAYSTLMLLSAIGNFTVLSILIRRRRNNINNMLIHLAIADLLVTFLLMPLEIAWSATVMWWAGDAWCRVTAFFRTFGLFQSSFVLVCISIDRYFAVLKPMNHLSDVDRRGKIMLSCAWIGSVLCSLPQMLVFRVQAHPYVPWFEQCITIWFAQDAKNPSVQEFVYFVFGMLMMYCIPFLVILFCYASILGEIYRHLREDKSDRFRRSSLGFLGKAKGRTLKMTVIIVVVFFICWTPYYFMSLWHFFDHKGSQKVDQKLQKGLYIFACTNSCMNPIVYGAFNI
Nl-AT-R	Nl_GPCRA16	IALHGVVFCVGLVGNALVCLAVYRNRSMRTVTNYFIVNLAVADFMVILFCLPPTVLWDVTQTWFMGTLVCKIVLYFQTVSVAVSVLTLTFISVDRWYAICFPLKFKSTTGRAKTAILIIWLLALVFDIPELLVLEAQKFGKFKEIDMDLIFFTQCQATWSEGTEGMYQMARILLLYTFPLMFMSIAYCQIVIVLWRSDNIPGHSETVLVHSGNGHGGKGRVANNSTECQLRSRRKAAKMLVAVVVMFAVCYFPVHLISILRMTMDIKQTEVTGGLAIVSHWLCYANSAVNPVIYNFMS
Nl-AVLP-R	Nl_GPCRA41	ATLAAILAITLAGNSTVLVALYMRRTWGGRKKLSRMYYFILHLCIADLVTGLLNVFPQLIWDITYRFRGGPLLCKLVKYGQTLGPYLSSYVLMATAMDRYKAICHPLTYCSWTSHHARSMVQCAWATALLFCIPQVTIFSYMEVPGSPGDYDCWATFPRDWGERAYVTWYSVSVFILPLIVLIYTYWCICRELWRNAGFPVTKASPHRLISRAKVNTVKQTVAVIALYVACSSPFIVAQLWAVWDPGAVHSPFFQGATFTILSLLSSLNSCVNPWIYLV
Nl-Bursicon-R	Nl_GPCRA46	WVVFLLAMLGNGTVVFVLVFSRSKIDVPRFLVCNLAAADFFMGVYLGMLAVVDASTLGEFRKWAIPWQMSAGCQLAGFLGVLSSELSVYTLAVITLERNYAITHAMHLNKRLSLKHAGYIMLCGWAFAVVLATLPLMGVSDYRKFATCLPFETTTGPWALAYVVFLMFVNGVAFLILTGCYLKMYCAIRGSQAWNSNDSRIAKRMALLVFTDLLCWAPIAFFSTTAAFGLQLVTLEQAKVFTVFVLPLNSCCNPFLYAIL
Nl-CAP2b-R-1	Nl_GPCRA25	TVVYATLFVSGVFGNLAVCIVIARNAALHTATNYYLFSLAVSDLTLLLLGLPNDLLVYWQQYPWPLGGLLCKVRALVSEMTSYTSVLTIVAFSTERYLAICHPLHSYAMSGLHRAVRIIAVLWLVSFVCASPFAVFAQVNYIDYPPGSGKPLAESAFCAMLEKNIPANWPIYELSGALFFCVPMVVIMVLYVRIGMRIRRRERHSLGKRLPGTVHRRSHSRKAIIRMLSAVVITFFVCWAPFHLQRLLYLYARDSLPHFNTINEWLFYVTGCLYYLSSTANPILYNV
Nl-CAP2b-R-2	Nl_GPCRA29	SVTYVLIFATGVLGNVAVCVVIFRTDELKSATNFYLISMALSDLSLLLLGLPNDLCLFWQQYPWPFDISWCKFRALISEMASNTSVLTIVVFSIERYVAICFPLRKGNFFLSDHERIVRVIACVWLVSLVFATPFAAFTTINHINYTNTTCQVADSAFCAMLDSNVPPCLPIYELSGLLFFLLPLLTLMVLYRKMNEALNNSPFWNSRSTKTGKTGTGVSGESRRFNNNNDRNAATTVRMLFAVVVTFFLCWAPFHLQRLLYIYGQNLKHYLLINEWLFYIAGFSYYVSATINPILYNL
Nl-CCAP-R-1	Nl_GPCRA26	VVLWLLFIGIVAGNSAVLVTLLLSKARRSRMNFFIMHLAIADLLVGLVSVLPDIIWRMTVSWVAGNLACKAVRFMQAVVIYSSTYVLVALSIDRLDAITRPMNFSGSWRRAKLLVIASWLISFLFSSPIMVLYEEREIQGRLQCWIELGEPWQWRLYMSLVTVTVFLVPAIVIAVCYAVIVHTIWTKSRHLMPPPPHPPPPPHSNGDLLNGHHATSPLTNCDHPDGEVELRRASSRGIIPRAKIKTVKMTFVIVFVFVVCWCPYLVFDLLQVWGFVPRTQTSIAVATFIQSLAPLNSAANPLIYCLFS
Nl-CCAP-R-2	Nl_GPCRA27	AILWALFGLIVVGNSGVLIALRCGHRRKSRMNFFIMQLALADLCVGLLSVLTDIIWRSTIAWNAGNTACKIVKFSQALVTYSSTYVLVALSIDRYYAIKYPMNLSGSWRRARVLVSMAWLLATVLSIPIAILYNERVIQGRLQCWIEFAEPWQWQVYMTLVATAIFVAPAFVISVCYALIVTTIWAKSKLFSIKPTNDDTRRASSRGIIPQAKVKTVKMTFIIVLAFVLCWSPYIVFDLLQVYGYIPRTQTNIAVASLIQSLAPLNSAANPLIYCL
Nl-CCAP-R-3	Nl_GPCRA28	AVMWTLFILIVLGNSAVLLTLLLRKNRKSRMNFFIMQLAIADLAVGLIQVLTDIIVRMTIAWHAGNLACKVVRYLQAVVTYSSTYVLVALSIDRYDAIKHPMKFSGSWRRAKVLVAVAWFLSLLFSTPSMVLFEVQMVQGQLQCWIELTEWQWQLYMTVVALLIFVIPAIIITACYAIIVSTIWSKSSHIVVVDNVHKRNNKGLFDKSSHHHHHHHHLHDHDSRRASSRGLIPKAKVKTVKMTFVIVFVFILCWSPYIVFDLLQVYGFVPKTQTNMAVATLIQSLAPLNSSANPIIYCLF
Nl-CCHamide-R-1	Nl_GPCRA14	VVPIIFALIFLVGVVGNGTLVFIFARHRNMRNVPNTYILSLALGDLLVILSCVPFTSTVYTFESWPYGELICKLSETSKDISIGVSVFTLTALSADRFFAIVDPMGNFSIGGRGATRCTIMIACGIWLLAALCAVPAAITSYIRDFTDNNKVLFHVCYPYPVEWGPMYPKTVVLIKFLFYYAIPLVIIAFFYSLMARHLILSTRNIPGEMQCQVRQVRARKKVAKTVLTFVVVFAVCFFPHHMFMLWFYYYPDAQSSYNSFWNYLRIVGFCLSFINSCINPIALYCVS
Nl-CCHamide-R-2	Nl_GPCRA15	IVPVIFAVIFFVGVLGNGTLILIFARNRAMRNVPNTYIFSLALGDLLVIVSCVPFTSTLYTVESWPWGEAICKLSEMAKDVSIGVSVFTLTVLSAERYFAIVKPLRRHVSSKPFTIATAIFIWIVSCLLALPAVINSTIQHEIVSKDKVIVYCTPFPEEYGKSYSKFIVMTRFLIYYLIPLCIIGFFYILMARFLVISTQNMPGEQQGQQSNQIKARKKVAKMVLAFVIIFVICFLPIHIFMLWFHFDPEAQEDYDEYWHTLRIIGFCLSYINSCVNPIALYCVS
Nl-Corazonin-R	Nl_GPCRA30	VLAVLAVLSAAGNLLTIASIRGSRLASRRRRRRRAWVAVYTLILHLAVADLLVTLFCIAGEAIWSYTVAWVAGDTACKLFKFAEMFSLYLSTFILVLIGLDRFLAVRYPMRSLSTAKRCTKLVAGAWLLSFILSLPQLVIFRVSRGPFVEEFYQCVTYGFYTEPWQEQLYTGFSFVCMFMLPLLILVSTYVSTIITLSKSDKMEVTGKSDPTRHRLIHRAKMKSFRISVVIVTTFIVWWTPYYSMMIIFVFLNPDKHVSNVIPVFSKINPIDSLIILFEIIFLTM
Nl-ETH-R	Nl_GPCRA6	FCIVILGIGVVGNVMVPIVILKTKDMRNSTNIFLMNLSIADLMVLLVCTPTVLVEVNSKPETWVLGEEMCKAVPFVELTVAHASVLTILAISFERYYAICEPLRAGYVCTKARALLICVLAWAFAAICTSPMMMISKYRSRVRYYDGSLVDVCLTQADTSWSAIFFLATISLFFVLPLGVLVALYSTIARHLTKEPGPASSSDACNQRARRQVVMMLGTVVMFFFLCLLPFRILILWIIVSPPEADLKQEFETYYVVLHFCRSMLYLNSAINPILYNL
Nl-ASTA-R	Nl_GPCRA2	AVPILFGIIVLLGLFGNLLVVIVVAANQQMRSTTNLLIINLAVADLLFIVFCVPFTATDYILPFWPFGDFWCKTVQYLICVTAYASVYTLVLMSLDRFLAVVHPIASMSVRTERNAITAIVVVWVVIVVGCVPVFLSHGVASYVYSSNVQSACVYLQYDPVNRPDGHNKPLFQITFFTTSYVVPLALICGLYLCMIMRLWRGVAPGGHCSAESRRGKKRVTRMVVVVVAIFAICWCPIQVILVLKSVDRYEITNTSVMVQIVSHVLAYMNSCVNPILYAF
Nl-FMRFamide-likepeptides-R	Nl_GPCRA40	YFAFITNGIMLNVVAILGIIGNIISMIILSRPQMKSSINYLLIGLARCDTVLILTSIFLFGLPPIYDYTHTELLRTYNAKIYPCVTPYIFPLALTAQTVSVYLTLTVTLERFVAVCHPLRARSLCTYGRARLYVTLIIVFSFLYNLIRFWEANVVQETIMEDGQNSTIYLVVASPLRSNPLYISLYIHWLYLIFIYFLPFTSLAFLNAAIYRQVRRANRERQRLSRLQRKEIGLATMLLCVVVVFFLCNVLALVNNLLESFYEILIDELIKLSNLLVTINSSVNFVIYV
Nl-GPA2/GPB5-R-1	Nl_GPCRA48	SVWFVISTALFGNTAVLIVLIANRSDTTVPRFLMMNLAFSDLLMAVYLLLLAFTDIQSTGMYFNYAFDWQRGYGCRIAGTLTVFSSQLSIYTLTLITIERWFAIRHALYANVIDLKVAIQAMIVGWVYSIGIAVLPLFGISSYSTTSICLPMDVHNAASTIYVLTLLMVTGVAFVIICICYIQVYLSLGKNTRHCPESSVARKMMLLVGTNFACCAPIAFFSLTAVAGYPLIDVTRSKILLVFFYPINSCANPYLYAIM
Nl-GPA2/GPB5-R-2	Nl_GPCRA49	AVWLVAILALLGNLAVLLVLLSSRFRMTVPKFLMCNLALADLCMGLYLLLIAIMDARSIGDYFNYAIDWQNGIGCKLAGFLTVFASELSIFTLTVITCERWYTITYAIHLNKRLRLSSAAQIMVLGWIYSITMATLPFFGISSYSITSICLPMENAKTSDLVYLVTLLVFNSLAFWVICACYSRMYVSIRGGQGQATADPLSCPDMRVAKRMALLVFTDFACWAPIAFFALTALAGLPLIDVPKTKILLVFFYPLNSCANPYLYALL
Nl-GPA2/GPB5-R-3	Nl_GPCRA50	SAWLVSLFALVGNTCVLLVLLSSRFRMSVPKFLMCNLALADLCMGLYLLLIAIADARSQGAYFNYAIDWQNGIGCQAAGFLTVFASELSVFTLSVITSERWYTITYAIHLNKRLRLGSASRIMAAGWLYSIAMAALPLLGVSSYSITSICLPLQTSSAVETVYLATMLAVNGVAFGVVCVCYGLMYASIRGQGQGRSGRVRSDLSVAKRMALLVLTDLVCWAPVAFFGLTALAGHPLIDLPSAKLLLVSFYPLNACANPYLYALL
Nl-Kinin-R-1	Nl_GPCRA22	SFCYGSISLAAVLGNGLVIWVIASSRRMRSVTNYYIANLALADIVIGLFAIPFEFQAALLQRWTLPEFMCSFCPFFKIISVTVSVFTLAAIAIDRHRAILSPFSARVSKTQFRLVISLIWVTGGILGVPFLYGNRVVDMIDDKGQRYPFCYSVNLTRSQLKFYRWLLVLLQYAIPLTVISWVYARMGFALWGATAPGNAQTERDANIMRNKKKVIKMLVIVVALFAVCWLPLQTYNVLQDVFPGINEYRYINIIWFCMDWLAMSNSCYNPFIYGI
Nl-Kinin-R-2	Nl_GPCRA23	FYGTISVLAVVGNALVMWIVATSRRMQNVTNCFIANLALADIVIGLFAIPFQFQAALLQRWNLPDFMCPFCPFVQVLTVNVSVFTLTAIAVDRHRAILNPLSARPSKLRAKLFIACIWGIAGFLAAPMAIALRVSYVEEDDPIGRVRLKPFCRNMTFSERQMMVYRVVLVFVQYFTPLCVISFVYSRMALRLWGSRAPGNAQDSRDANLMKNKKKVIKMLVIVVALFAFCWFPLQTYNLLQDIFPDINKYRYINIIWFCCDWLAMSNSCYNPFIYGI
Nl-MIP-R	Nl_GPCRA10	YVMPLLLLITIVANTLIVVVLSKRHMRTPTNAVLMAMALSDMFTLLFPAPWLFYMYTFGNHYKPLSPVGACYAWNVMNEVIPALFHTASIWLTLALAVQRYIYVCHAPVARTWCTMPRVLKCVAWISVLATLHQSTRFVDRVYEPLTIKWRDQEHVTVCQVRIAYWVEHWVSTNLYFTLYFCFRVIFVHAIPCVCLVALNVLLFRALRVAQLKRDKLFKENRKSECKRLRDSNCTTLMLIVVVTVFLATEIPLAVVTVLHIISSSITEILDYSVANVLVLFTNFFIIVSYPINFAIYCGM
Nl-Myosuppressin-R	Nl_GPCRA13	ALLVCLFGSVANTLNIAVLTRREMYSPTNAILTGLAIADLLVMLEYIPFTLHMYILTRPAEVRFTYGWAAFVLFHSNFTQVGHSISIWLTVTLAVWRYIAVAHPQHNREWCSMQRTICVILTGYLVCPLICIPVYFSFDIRPEVSLVDESGEFSKSNDSSIPVHNATLFYVSLSELSQANNNLLYDINFWIYSVVIKIIPCIALTILSLRLVCALMDAKKRRQKLTSGSSRKSVKNLDKERQTDRTTRMLLAVLLLFLITEFPQGILGLLSVVLNKKFFNECYISLGEVMDILALFNSAINFILYC
Nl-NPF-R-1	Nl_GPCRA38	VTVYGALMAVGLLANLAVGLVVAGRPRLRTARNLYVANLAVSDMTLCAVCMPFTLIAIVRRRWSLGVALCKLVPLAQGTNIMVSVGTITVIAVDRYSTIVRGGHHGSEGGTGGDRRRVAISIALVWALSALATLPVVFYQVVEPLTFSHVVLYETCIERWPSQTLRVSYTASVLLVQAVIPALVVGVVHARIASYLHQHAQTQKDSRRAKRELQRNRKTTMLLSGVAVLFAVSWLPLGVFTLTADLLFPPGADPNPASARQLYLTLAACHALAMSSAVSNPVVY
Nl-NPF-R-2	Nl_GPCRA39	ILTYSILMTSGVVSNALVCFVVGRQCARKRSSGAASPSPRNMYIVNLAVADIALCLVCMPFTLISLLKRRWTLGSMLCKLVPVLQGANISVSAGTIAAIALDRYFTIVRPRRSQACQGAVCSVASVISIVWGLSFVTMIPLLIFQEVETISYGELILYEACVEKWPSKTWQICYTGCLMMAQFLVPFLVLSIIHLKISTYLAVRVSTPPRDANSKRAKREWRRNRRTMVILTCIAVVFAISWLPMTVFSLVAEINPSILGEPSTMYAVFAGNFYYFPFLLFIISI
Nl-PISCF-R	Nl_GPCRA1	LYAIVCIVGLFGNSLVIYVVLRFSKMQTVTNMYIVNLAVADECFLIGIPFLIATMSLQLWPFGKIMCKFYMTTTSINQFTSSIFLTIMSADRYVAVCHPISAPKMRTPFISKVVSATAWTASALLMIPIFMYASLMNDGQVNMSCNILWPESENLSGQTAFTLYSFVLGFALPLLLIFCFYVMVIRKLKTVGPKNKSKEKKKSHRKVTKLVLTVITVYVCCWLPYWITQMSLIFTEPNKCQSRFVVTVFLLTGILCYSNSAMNPILYAF
Nl-Proctolin-R	Nl_GPCRA8	FVPLVVFVGLLGNSVTVVVLTRRRMSSSTNTYLTALAVADLLYLLGIFYLSVEHYPDVHLTTHAWYWVYYRFIIWFTDVASAVSVWLTVSFTVERYIAVCHPLRGKVICTEKRARRVILAIFALCTLATVTTPFEYYVRTDTNPNTNQTSISIGHTALADNDIYRAFFYWFWAFAFVFVPLVLLAVFNTILVGTVRRSIRQRGLTEVETNCRQKQENKITMTLIAVVFLFMVCQTPQAFLLIVTYFYSPSRKSLGHFVLRGLGNIANFLVAINAASNFILYC
Nl-Pyrokinin-R-1	Nl_GPCRA35	LYAVILLCGVVGNVSTCIVIARNKHMHTATNYYLFSLAVSDMILLLAGLPQEIMHTLFKYPYTFGETACVMTGLASETSANATVLTITAFTVERYVAICHPFLSHTFSKLSRAIKFVFIIWLFALILAIPQAIQFGIVEVEMNSTFDEPVLTKTMCTLKKDASIEPTFLLSTCLFFIAPMTLITVLYILIGLKLRRSRLLKRPSITGNHIAERQNQKSQNHVIRMLIVVVVAFFICWAPFHAQRLLALYASSQGTNSETVIAIYNILTHTSGILYYLSTTINPLLYNIM
Nl-Pyrokinin-R-2	Nl_GPCRA36	TVLYSLILLTGIVGNVVTCVVISRNRHMHTATNYYLFSLAVSDLLQLVSGLPQEIYYVWSRYPYIFGEAFCVLRGLAAETSANATVLTITAFTVERYLAICHPFLAQTMSRLSRAIRLILIIWCVALAFAVPQALQVGIVNEEVPDGAMCALKPYSKKDTFYLLTIFWEHSFALSTILFFLVPMTIITVLYALIGLRLRKSALLKKSSGSFSNNYNRKPTCRQQSSQRVLKMLVAVVVAFFICWAPFHAQRLLGTYLTGPAGSHSSTAQIIYVVVTYLSGILYYMSTTVNPILYHIM
Nl-Pyrokinin-R-3	Nl_GPCRA37	YVTILVCGVVGNVSTCVVIARNKHMHTATNYYLFSLAISDLLLLLAGLPTEIYHLWFLYPYVFGEAVCVLTGLAAETSANATVLTITAFTVERYVAICHPFLSHAVSKLSRAVKYVVIIWMLALLLAVPQALQLGIVYEVYRNGTKVSEDLKLCTIKHAVGSHTFGLSSVLFFLAPMLLISVLYALIGLRLQRSNRAARREAHGGGSRPLTHTASRRHHAHAGSTRRVVKMLVAVVVAFFICWAPFQAQRLYAVYGYEGDKTSAQRVILYKTMTYLSGLLYYLSTTVNPILYNIM
Nl-Ryamide-R-1	Nl_GPCRA20	FVMYCGIFVAALLGNGLVCYVVSCSRRMHTVTNFFIVNLAVGDILMTLFCVPFSFVATLVLQYWPFGELLCHTVQFSQVTSVMVSAYTLLAISVDRYMAIMWPLRPRMSKHHAKITISVVWTIAIATAFPIFTVSHLAQPSPWHKSCHRFICTENWESKEYQNVYSFLLLTLQYVVPFSVLVFTYTRIAVVVWGKRIPGEAQNSRDARMARSKKKMIKMMVTVVVVFTVCWLPLNIFLLVWEQNPDLSNWELMPHFFFACHWLAMSHTCYNPIIYCWMN
Nl-RYamide-R-2	Nl_GPCRA21	YLTYSAIFVVALVGNGLVCYVVLSSARMRTVTNIFIVNLAVGDIMMTVLCVPFSFVSTLILQYWPFGAPLCHTVSFSQAVSVLVSAYTLVAISLDRYMAVLWPLRPRMGKRHAKATVAAVWLGALITAFPIPAVSSLKQPSRWHHNCDRFVCEEEWESQSMRQLYSAALMTLQYAVPLCVLVFTYTSIAVEVWGKRPPGEAQDTRDIRIARSKRKMVKMMLTVVAVFTICWLPLNILLITWQSCDWLSEWSGLPYLWFACHWLAMSHSCYNPFIYCWM
Nl-SIFamide-R-1	Nl_GPCRA5	CVAYLLVFCVGVVGNFAVVAVVCRSPRMRTPTNLFIANLACADLLVNIICLPFTLISNIMTAWTMGWLVCKTIPYMQGVSVNASINTLVAISFERWLAICYPMRWQMTSRVCKLVILLIWLFSLTITLPWALFFQLRPMGDGSSMQTCLETWPTPYSENVYFVLANLVMCYLLPLALISICYFRIWRRVCCRKMPGEVQMYQELIIHRSKVKVIKMLFIVIVLFACSWLPLYVIFTRLKLGGDLQPWEEPLVYNLLPLAQWLGASNSCINPVLYAFF
Nl-SIFamide-R-2	Nl_GPCRA4	AYLIVFVVGLVGNVFVIAVVYRSPRMRTVTNFFIVNLAIADILVVVFCLPATLLSNIFVPWILGWWMCKTVPYVQGVSVAASVFSLIAVSIDRFLAIWYPLKCQITTRRARTIIAVIWLVAATTTLPWALFFDVVIFSEEPDVPMCVEVWPDYLNGNLYFLFANLIMCYIVPMILISLCYILIWIKVCKRHIPSDTKDAQMERMQQKSKVKVVKMLVAVVILFVLSWLPLYAIFTRIKLGGDLDVWETKLFVVLTPVAQWLGSSNSCINPILYAFF
Nl-sNPF-R	Nl_GPCRA7	LYTTICLLGLFGNVLVCYVVGRNRAMHTVTNCFITNLALSDILLCVLAVPFTPLYTFASTWMFGRALCHLVAYAQGTSVYISTLTLTSIAIDRFFVIIYPFQPRMKLSTCLSIILLIWIFSMMATLPYGIYMHHGPMTGHEDRVFICDENWPSESFRQVYGLLTAALQFLLPFFIIAFCYVRVSLKLNDRARSKPGSKNTRKEEADRERKRRTNRYIKMLIAMVTIFGVSWLPLTVINLLNDVYIPTGSWRYYNLCFFIVHALAMSSTCYNPFLYAWL
Nl-Sulfakinin-R	Nl_GPCRA9	PLYAGIFLLAVAGNALVILTLVRNQSMRTITNLFLLNLAVSDLLLGVVCMPFTLVGNILRDFVFGDLMCRLIPFLQATSVAVSAWTLVAISVERYYAICHPLRSRRWQTLSHAYRLIAVIWLASFVTMLPISLLSRLIPTNQGLKKCREIWPDADYERGYNLMLDAVLLVLPLFILIVTYSLITITLWRGIRPSNQSGQGELMNNGCSHIEVTRSSSSFKFNSTVGTTSSSSPGGLRRTNTEKALLKKKRVIKMLCAVVLEFFICWTPLYVINTVTLFDKYIVYNALSFQAISFFQLLAYSSSCCNPITYCFMN
Nl-Tachykinin-R-1	Nl_GPCRA24	TFLYATMVFVATGGNLIVIWIVLAHKRMRTVTNYFLVNLSIADAMVSTLNVTFNYIYMLNSDWPFGTLYCKITQFVAVLSICASVFTLMAISIDRYMAIMHPLRPRMGRRTTLCIAGAIWVVGTILSLPMLIFFTTVVQDFPNGDSRVVCYSEWPDGATNESYQEYLYNLAFMVLTYFLPISSMSFTYIRVGIELWGSQSIGECTQRQLENIKSKRRVVKMMIVVVSIFAVCWLPFHAYFIFTSIMPEITNHPSIQDIYLAIYWLAMSNSMYNPIIYCWM
Nl-Tachykinin-R-2	Nl_GPCRA33	WICLFLPMLFVAVAGNIIVMWIVLAHRRMRTVTNYLLVNLSLADLLMSLLNCIFNFIFMVNSHWPFGAFYCTVNNFVANFTVADSVFTLVAISIDRYLAIVHPLKHRTSKKRALLMLLSVWLASTLLAIPCILYSTTMTKRYKNGNYKTICYMKWPDGQYPQSSREYIYNLIFLGFTYLIPVVSMAACYGVIGHHLWGSKSIGERTQRQLQAITAKRKVVRMLITVVSIFALCWLPYHSYFIFAYHNQSVAVKTYIQHIYLAFYWLAMSNAMVNPIIYYWM
Nl-Tachykinin-R-3	Nl_GPCRA34	IWTSLFGAMLLVSTTGNTTVIWIVLAHRRMRTVTNYFLVNLSVSDLMMSLLNCVFNFIFMLNSHWPFGSVYCTINNFVANVTVAASVFTLVAITLDRYMAIMRPLRHRMSRRRARLLIAVVWASSCLLALPCLRYSQTMTRKYRNDSSRTVCFMEWPDGHYPHSVTEHVYNIVFLSLTYVIPVIAMAVCYTVMGQELWGGSIGEQTQRQLDSIKSKRKVVRMFSIVITIFALCWLPYHGYFIYAYHDKSVTESKYVQHLYLGFYWLAMSHAMVNPIIYFWMN
Pc-ACP-R	Procambarus-GPCRA25	LIAYSLLFPFAAIGNLMVFVALFRNRHRKSRVNMMIMHLSLADMIVTFVFLPTEITWQVTIQWVFGNFGCKIYKFFSAFGFYMSSMVVVCISLDRYFAVLHPLRVNDAQRRGKIMLFFAWLISAVISLPQSVIFNVQPHPVVPDFYQCVTFGFFDSKNGGEMMYTIFCISFLYFIPLSIIIVAYTRIILEISRKSRDTQHDCSREERYHGRLQLRRSNMSNIERARTRTLRMTFIIVMAFVWCWTPYALATLWNFIDPKTFYSMNKHAQDFLFIIAVSNSVVNPIIYGRYSISC
Pc-AllatostatinA-R	Procambarus-GPCRA05	VVPIIFGIIVLVGLFGNTLVVIVIIANKQMRSTTNYLIFSLAMADLLFIVFCVPFTASDYILPTWPFGSIWCKTVQYLTYVTAYASVYTLLLLSFDRFLAVVHPIAALTIRTEKNALHSITLSWILILTSCIPLYLCHGIKKQKFEDEVYFQCAFLDHEYNHMAFHIGFITTMYFVPLTVIVVLYLMILNRLWYGVSLGGSRSAESVRGKKRVTRMVVIVVVTFIVCWFPIQLVLLLKSLNMYEMTTFNIIMQIAGQVLAYINSCVNPILYAF
Pc-AllatostatinB-R	Procambarus-GPCRA39	YGYAMPVLLVVTTVANTIIVAVLWQHHMRSPTNAVLMAMALSDMLTVLFPEPMFFYMYTLDNHAKPLHPEAACYAWSFLHEDIPNLFHTASIWLTVALAVQRYIYVCHPPVARTWCTLPRVIKAIVLIFILATVHQAPRFFDTVYDMVDMEWHGECVSVCSEKLSDWVMLITADTYFPIYFWFRVVFVHLGPCTVLVVLNLLLFTAMKEAQKRRKKLLHDKNSKRECKKLSDSNCTTLMLIAVVSVFLVTEIPLAVITLLHIVSNMGLELFSNESYNMLMYFFILSNSFIIFSYPINFAIYC
Pc-AllatostatinC-R-1	Procambarus-GPCRA03	FYAITCVVGLCGNTLVIYVVTRFSKMQTVTNLYILNLAIADELFVVGIPFLMTTSMLGHWPFGSIMCKLYMITTSLNQFTSSLFLTIMSADRYIAVCHPISSPRFRTPMISKLVSLTAWTLSALMIVPVFMYSNTLEDNGLDNCNIFWPESEGVRGEIAFIRYSFALAFGAPLALIFIFYSLVLHKLKTVGPKSKSKEKKKSRQKVTRLVLTVITVYVICWLPYWVLQLTLILSTPKQGHTNFMVVLFMISSCLSYINSALNPILYAF
Pc-AllatostatinC-R-2	Procambarus-GPCRA64a	CYAVAFLVGLCGNTLVIYVVTRFSKMQTVTNLYIVNLAIADELFVVGIPFLMITSVLGYWAFGTFMCKLYMITTSLNQFTSSLFLTIMSADRYIAVCHPISSPKFRTPMISKLVSLTAWTTSALMIVPVFMYSNTLEYNDLVNCNIFWPDSFGISGQFVFTLYSFVLAFGIPLVLIFIFYALVLQKLKSVGPKTRSKEKKKSHRKVTKMVLTVISVYVMCWLPYWVLQLALIFSPPGEGQSPFMVILFLISSCLSYINSAINPILYAF
Pc-AllatostatinC-R-3	Procambarus-GPCRA64b	LIFLAFGFFLGLCGNTLVIYVVVRFSKMQTVTNLYILNLAIADMLFVVGIPFLMITSVLGYWAFGTFMCKLYMITTSLNQFTSSLFLTIMSADRYIAVCHPISSPKFRTPMISKLVSLTAWTTSALMIVPVFMYSNTLEYNDLVNCNIFWPDSFGISGQFVFTLYSFVLAFGIPLVLIFIFYALVLQKLKSVGPKTRSKEKKKSHRKVTKMVLTVISVYVMCWLPYWVLQLILTFSMPKQVQSRVMIIFFLISSSLSYINSAINPILYAF
Pc-Bursicon-R-1	Procambarus-GPCRA28	WIVFLLALLGNGTVVVVLTFARAKMDVPRFLVANLAFADFFMGLYLGFLAVVDASTLGEFRMYAIPWQTSAGCQVAGFLGVMSCELSVYTLTVITMERNYAITHAMHLNKRLSLRHAAYIMVLGWLFACTMALLPLIGVSDYRKFAVCLPIETKGGGLGYVVFLMFINGVAFLILMGCYLKIYCAIRGSQAWNSNDSRIAKRMALLVFTDFICWAPIAFFSLTAAFGLQLISLKEAKVFTVFILPFNSCCNPFLYALL
Pc-Bursicon-R-2	Procambarus-GPCRA29	WIVFLLALMGNGVVVVVLVAAYSKMDVPRFLVTNLAVADFFMGVYLGFLAVADASTLGEFRMYAIPWQMSPACQVAGFLGVLSSELSVYTLAVITMERNYAITHAMHLQKRLSLRQAAYIMVVGWMFAITMAVLPLTGVSDYRKFAVCLPFETDGAGLGYVVFLMFINGVAFLILMGCYFKIYCAIRGSQAWNSNDSRIAKRMALLVFTDFICWAPIAFFSLTAAFDMHLISLEEAKVFTVFILPLNSCCNPFLYALL
Pc-CCAP-R	Procambarus-GPCRA37	TVLWMLFISIVVGNVAVIAALMLSKTRKSRTNFFIMHLALADLSVGLISVLTDIVWKSTVSWNAGNVGCKAVRFAQVLVTYSSTYVLVALSIDRYDAITHPMNFSGSWRRARRLVLVAWLLSAVFASPSLVFFMEARVDGAIQCWIDFPEAWQWKLYMTLVALSVFLFPTVIITACYAIIVYTIWSKSKIMTVNSKALGSKNGEKRGGHHEDDSRRASSRGLIPKAKIKTVKMTLVIVFVFILCWSPYIVFDLLQVYGYVPQSPTNVAVATFIQSLAPLNSAANPIIYCL
Pc-CCHamide-R	Procambarus-GPCRA43	IVPILFAAIFIVGVIGNGTLIVIFARNENLRNVPNTYIISLALGDLLVLFFTVPFVSTIYTIESWPYGNFECKFSELVRDISVGVTVFTLTALSADRYLAIVSTIRRAVGGAGRRTLRTAVGIWVAAGMLATPAALFSQVQAFHVTDEKVINVCYPFPEDLPEWYSRANVIVKALLYYLLPLVVIATFYLLMARHLLSSDDVPGESHVFHRQLRTRRKVAKIVLCFVLIFAVCFLPTHVFLLWFYLDPQASIKYNQFWHALRIVGFCLGFINSCINPIALYCIS
Pc-CNMamide-R	Procambarus-GPCRA27	YYVPLLIVVGFVGNLLSCVVFLNTRLRMRSSSYYLAALAIADVTYLFILFLVWLDLLGFNTFNINVMCQLEIYLGSVSSSLSVWLTVAFTVERFIAVQYPLQRPTVCTVHRAKTVIILLSAFSVTVHLYVFVTAGVVVHHDEDGTPITECNLRMDYRGLMNVINWIDTLLTLVIPFIMIVVMNTLIARQLILFSRRFRRRDDFLRLQEVSGGQANGHHKQGGTSSHSGRSPCVSSGRGVNRISVKRHVGQAAASSSSSTTKNNNNLKMATPFASSAATVLSYPSKNPRSILSTRTQYSITKMLLLISTVFIILNLPSHVIRVHAFISSLWGEDHDSDEVTMWNLQQLFMQLQYTHFSINFVFYSTCGATF
Pc-ETH-R-1	Procambarus-GPCRA42	VGVWTGVLVTLMAVGVGGNVLVPVVVMRTRDLRSSTNLLLVNLAAADLLVLLVSLPTALIELHSRPETWVLGEPMCKLVPFVEYCVCHASVLTILVISFERYYAICRPLRASYTCTKMRACTCILTIWAAAVILSCPMMVMSKHELVPYADGTMVTGCXXXXXFFVPLLLLILLYLVIGRSLMRDSASAALQHRKVDLPNMKARRQVVVMLATVTIFFFVSLLPFRVLTLWIVWTPKEIIETVGALRYYSMLYAARVMLFANSAVNPILYNL
Pc-FMRFamide-R	Procambarus-GPCRA18	ILTIVGLLGLAGNLISITILSRPKMRSSINCCLIGLTTFDMIVVTTSVLMFGVPEIGEYTNSMVWYTQGVFQRVTPFIFPVALMAQTGSVYLTVTVTVERYIAVCRPLRARSLCTYGRAKIYVISVALFSVLYNIPRFWEVSYKECNVKEAEFVIVLPTALRTHPYYIEIYIMWMYLIVMYLVPFLSLMIFNFFIYREVRAANHERQQLSRLQKKEIGLAVMLLVVVTVFFVCNVLAFIINILELLGITIELLTNASNLLITINSSVNFIIYC
Pc-GnRH-R	Procambarus-GPCRA40	LLKISLEGSYTSEQDLASSRGGLEESYLPLDVLAERVNETLANVSSGPLNETEGVMEGLVKEMPQEMMFNTSHIITISAYSCLMVLSALGNISVLRSIAGHRSRSLASRVTLMILHLTIADLLVTFLLMPLEIGWAWTVSWEAGDVACRILAFFRTFGVFLSGFLLVAISVDRYYSVLRPLTVMEAKRRVRLMLWMAWGASGVCSIPQTVIFHVEQHPDHPWFEQCVTFHSFPSPTYELLYNVAGFIAMYAIPLLTILFCY
Pc-GPA2/GPB5-R	Procambarus-GPCRA30	AVWLVVVTAVLGNLAVIIVLISSKFMTVSKFLMVNLALADLCMGLYLLIIAVMDLHTIGVYFNHAIDWQNGPGCKVAGFLTVFASELSIFTLTVITSERWYAITYAIHLNKRLKLSMAVKIMVVGWTYSITMAALPLLGISSYSKTSICLPMETGNALALAYLISLLLVNGLAFFVITACYASMYCSISRHDATAPHSDLTVAKRMALLVFTDFACWAPIAFFGLTAVAGVPLINVTRAKILLVFFYPLNSCANPYLYAIL
Pc-Leucokinin-R	Procambarus-GPCRA10	SIFYGSISLVAVIGNALVMWIVATSRKMHSVTNYFIANLALADIIIGLFAIPFQFQAALLQRWNLPEFMCAFCPFFQTVSVNVSIFTLTAIAVDRYRAIVFPLTARPSKFRSKVVIASIWLFSATLAIPNAIALRVRYIKDSLTKEQKPVCLAEGIDPTVMWTYSHVMVGLQFFVPLGIISFAYIRMGWELWGSRTPGNAEDARDAIVLRNKKKVIKMLFIVVALFAFCWAPLQTYHVLQEIYPSINTYRFINIIWFCCHWLAMSNSCCNPFIYAI
Pc-Moody	Procambarus-GPCRA22	FIGYMVLGLTGNFLTILALLRCPRVRNVTAAFIISLCVADFLFCVLVLPWEVSRFLAGKWVWGEGWICTLFPLLRYWNVAVSLLSIAMITINRYIMIAHFSVYKLVYRKGWIALMIAFCWVFAFVMLLPTLLSKWGRFGLDRRLQTCSILDDSNKSPKQVLFGLGFCVPAIVIVICYSLIFFVIHKSEKRMRQHSTRGMNGAAPPSGPTLQPQSRVTTKVEREARRRRNEWRITKMVLIIFIAFLITYLPITLVKNLDKKVDYPGLHVLGYVLIYISACINPVIYVIM
Pc-Myosuppressin-R-1	Procambarus-GPCRA38	HGYLALMICLVGAFTNILNMVILTRREMINSTNTILTGLAVADFLLLLEYSFYAASYIKGQDTMFDNYVHSVFILFHAHFTQVTHTIAICLTITLAVWRYIAICKPHLNLFLCTLPRARLAVVVAYLVSPVLSVPNYLMYSIRQRHDRYSNKSLYHVDFSDRARASNSLLQSIHFWFYSVLIKILPCLLLTFFIYHIISAMYTAKRRKENLIKMSTPSMETERKLPRMERLTEKTTRMLLTVLLLFLATELPQGILSLLSAIYGHSFFRKCYLHWGEVMDLLALINGAVNFLLYY
Pc-Myosuppressin-R-2	Procambarus-GPCRA17	QAVHGCMSLAVCVFGSVANVINMVVLTRRSMVSPTNAILTGLAVTDLLVMVEYIPYTMHQYVWQSRPLASRYSWGWAVFVLFHAHFAQVFHTISIWLTVTLAVWRYIAIAFPQNNTTWCSMRRTHAVSLAAFFCSIVCNIPNYLNFTISKIEHRGQTLYIVNFSHLALAHGGFLKSINFWIYAVMLKLLPCGALTSLSFALIQELLRAARRRAQLMKNTSGRGADAEKQADRVTKMLLGILVLFLASEVPQGILGLLTVIPDSGFFPCYQKLGEIMDMLVLFNSAINFLLYCAMS
Pc-NPF-R-1	Procambarus-GPCRA36	IVCYISLILFGVGGNMMVGWVIWRKRAMRTPRNLYIINLTVSDLSMCLICMPVTLVGLLYKNWGMGSLACKLVPVLQGANIMVSTSTVVAIAVDRYATIVKVGRSTRSKFHVAASICAIWTSSVLFALPLYFYYIVTQVKLHHILLYSRCVDHWPSRSVKNVWIIALLLTQYGIPIVVLSVVHARIKRYLGQHMMGQYDARRAQKEIERNRKTTILLSTIAVAFAVCWLPWNIVNLLADFEYEGFRDPTHLYTVFGACHMIAMSSACINPVLY
Pc-NPF-R-2	Procambarus-GPCRA13	ITIYSLLIIVGILGNLIVAFVIGRRSELRTARNVYIVNLTVSDVSMCLVCMPFTLVGLLHKNWSLGNFICKLVPVLQCTNILVSTATIVAIAADRYLTIVCVKRNKDARAYIPWSIAVIWLVSLVFPLPLFAYYFVKRVQIKDYLLYEKCMESWSSPVVKYTWNITLIVMQYIIPILVLSFVHGRIQNYLSSHKMSQRDARRAQREIERNRRTTILLTSIAVTFAICWLPWHVVNLLADFNYAGFQEPGYFYVVFGSCHAVAMSSACINPILYGW
Pc-NPF-R-3	Procambarus-GPCRA12	IVVYSLLIILGSTGNSLVVVAVIRKPAMRTARNVFIINLAISDLLLCLVTMPLTLVELLSLYWPLGNHPFLCKLVGTLQATSIFVSTISITAIALDRYQVIVYPTKESLKKVGAVLMLLLIWVISFILALPNFIWRTLKHHDINLPNLCSINFCFEEWPTVHGRGYYSLFVILVQYCLPISTVSVSYAMICRKLKYRIKNSAVRSSKKGERDNKRMKKTNTLLIAISLIFCVSWLPLNLYNLVVDFVNPFGDDMETILVVYAVCHMMGMSSACSNPLVYGW
Pc-Periviscerokinin-R	Procambarus-GPCRA24	TAVYMVIAVGGVVGNALTCLVVARNHTMRTSTNYYLVNLAVADLLTLCLTLPVEVYQMWVQYPWPLGEAACRLRAMVPETLTHVSVLTILAVSGERYVAITDPVYARTTHTLTRTARVLPVIWLTSMLAAVPLGYFQKVNLVKSPLGSDLPQSAWCAIPYDDPSPRYCWLLWASSVGAFMLPMAVLIVLYCKIGMVLSIDPPTRTPAAGAGAMHTRKVGIRMLVAVVVAFFLCWAPFHAQRLMFVTITTYGQWTPYHRSVNTKLFYCTGICYYLNSAVNPILYSV
Pc-Proctolin-R-1	Procambarus-GPCRA59	WLYWQYFRYGLWLTDASSSTSIWLTVTFTIERYIAISHPIKGKVLCTMSRAKKVIIVVYFLCFALTASTPHEWVVVTRTRPDTLEPYLALDFSRLGQDSRYRXXXXXXXXXXVNSISSMPSTLAESKLHRRKMTMVSDRDHYSHQQEHKITVMLIAVVILALLCQMPTAVLLLYSTVYEPPSKTPTFAIMRGLGNIFNLLNAVNAAANFILYCAFSDKYRRTFLLTFVPCAYHQQPLAHSFVASV
Pc-Proctolin-R-2	Procambarus-GPCRA19	MVPIVMCIGVVGNSVSMVVLTRRKMRSSTNNYLTALAISDLLYLVFIFSLSFRHHPGMSRPHHWFYWHYSRYALWLTDASGSTSIWLTVTFTIERYIAVCHPIKGKVFCTESRAKRVIVAVFILCFTLTATTPHEWVINEVTDSVTGQAKLAMDYSVLGSNDTYRKVFYWFTAVVFILLPLVLLAVFNSFLIHVVKQSRAQRCTMTNQRVERDTHSQSQEYKITVMLIAVVLLALLCQLPVAVLLLYQSFYASKPNSIASYMERGLGNIFNLLSAINAACNFVLYCAMS
Pc-RPCH-R	Procambarus-GPCRA06	ISSYSGIFFVSLVGNLCVLWAILGGGRKQRKSRVNLMLLHLAIADLIVTTVMIPVEVGWAATVQWVAGDATCRIFSFFRIFGHYLSSFILVCISIDRYFAVVHPLSLNAADRRGKIMLIFAWFLAFSCSLPQVIIFHVETHPLFTFYVQCVTFNFFPSMHHEMVYNIFCLVMLYVAPLTIIIIFYAAIVLTIFQKSRLSSDDTTIRRSSLGYLGRARTRTIKMTVSIVLAFFVCWTPYVVISLWFCFDRSAAALLDEKVKKGLFIFACFNSCVNPIVYGIFNFC
Pc-Ryamide-R	Procambarus-GPCRA08	YLVYASIFLLALLGNSLVLYTVASNRKMHTVTNLFIANLAVGDLLSMVFCVPFSVASIIVLQYWPFGEGLCIIVNYSQAISIFVSAYTLVAISLDRYLAIIYPLRPRMTRLQAKVIIALVWGLALFTTLPIAVFSGLDPTDMRIYQSSGREVCREQWPDEALRKYYTMALMVLHYFLPLVVLIFTYSRIAWKVWGCKPVTSRCSLNATSQMPHLKSSETGRGLLRKSTSDHSPAKMIKMTLTVVLVYSLCWLPFNILLVVLDFVEEMSFWPHLHHLWFVFHWLAMSHTCYNPVILCWM
Pc-SIFamide-1	Procambarus-GPCRA46	NSFIVNLASAAFLVIVFCLPATLLSNIYYPWMLGWIMCKLVAYVQAVSVSASVNSLVAVSLDRFLAIWFPLKLQITTERARALIVVIWIMAVGSAIPYYVYFETQIFDPDVPDLIVCVEMWPSREAERLYFLIAHLLFCYLLPLALIIFFYVMIWIRVARRTIPGDTRDAAVHQMQQRCQVKEVKMLVGVVIIFMLSW
Pc-SIFamide-R-2	Procambarus-GPCRA07	AYVFVSVMGVIGNSFVVAVVMRAPRMRTVTNVFIANLAVADLLVNIIVMPTTLIGHLLNAWVLGLFVCKAMSYLQGVSVSASINTLVAISVDRALAICYPMRCQITSRTCRSIIVVIWAFSLTITLPWAIFFKLEPIPDTDLHVCTDKWPDPHSGNMYFVLANMVMCYLLPLTVISVCYILIWCKVWRRKLPGEQQDVGVAMMIHRSKIKVIKMLLVVVILFALSWLPLYAIFARLKLGVVLTEMETQVIHVLAPIAQWLGASNSCINPILYAFF
Pc-sNPF-R	Procambarus-GPCRA14	YIEYLTIFLLGVFGNCLVCYVVFRNKHMQNVTNYFITNLALADILLCVLAVPFTPLYTFMGQWMFGRLLCHLVTMAQGTSVYVSTLTLMSIAIDRFFVIIYPFRPRLRLSICYLIIISIWLFSISATLPYALYVRQVEYQDRYYCEELWPSESIRQVFSGFTAIMQFVVPFIIILYCYVKISVRMNERVRAKPGTKSSRKEEADRDRKRRTNRMLIAMVTIFGTSWLPVNVVHLVGDYYAPASEWGYYNLCFFITHVVAMSSTCYNPFLYAWL
Pc-Sulfakinin-R	Procambarus-GPCRA15	VIIFLLGVVGNTLVIVTLLQNRKMRTITNVFLLNLAFSDLLLGVFCMPFTLVGSLLRDFIFGPVMCRLIPYFQAVSVSVSVWTLVAISLERYYAICQPLRSRGWQTLSHAYKIISLVWLLSLAFMAPIAALSQLLPVGDTSRHKCREMWPSLHLERGFSMFLGAGLLLVPLIIMVAAYSSIIISLWHGMRLERETAKVPVPVRHIYRLISLTDLNSLTMVQQSLRRKNSRRHASKISIRFRKIPAQTRACEECGEAGRNSGIELGPVHDPHTQSLDQESGSHTCLHGREYHNYKWQVESVRENGNLASPQGKAPKNGFKRLRSTHLEKSIEAKKHVIKMLFVVVLEFFLCWTPIFVVNIMCLYIPDQVYRALGSFGISFMHLLSYASSCCNPVTYCFMN
Pc-Tachykinin-R	Procambarus-GPCRA09	WSVFFGGMVVVATGGNLIVIWIVMADRRMRTVTNIFLVNLSVADAMVSTLNVVFNFTYMLNLHWRFGRIYCKISQFVSILSICASVFTLMAISFDRYIAIMHPLRPRMGRKATIMIVVWIWVSSTCLSMPNMLFFTTAALPLRDGSERVVCYGAWPDGDQGDSYSEYVHTVVLMVLTYILPLLCMGFTYARIGLTLWGSRSIGEQTPRQVESIRSKRKVVKMMIVVVTIFAICWLPYHVCFILFNLMPEIAHTDYIQETYLAIYWLAMSNSMYNPMIYCWLN
Pc-TIE-1	Procambarus-GPCRA23	AVFCCVLFIVLGVPGNLITIIALVKCKKVHNATAVFIINLTLSDLMFGVFNLPLAASLFGHRAWVHTGFLCLLFPILRYGLVAVSVFTVLAITINRYVMIAHPRLYHRLYTRTWLAIMVVATWIGAFGALVPTLLEFWGTFGLDPAIGSCTILPDRDGNSPKEFLFVFAFVLPCVAICVCYARIFCIVHRADKKSHSHSQHFLKVNGKRHKNVASPCTADPPTLQTLHATPLHDRLQLETLVKLSTSSNSVKVEIVEPQEESQKNEESSLDGNGRGGCGSKEGTRTPSPETTPAGMTTDASSLLKTEANGFSGHSSNEGVGASSAACSPIRISPPTAPESPASVKSDRKISTNIERRPSTISGRGGTFSHLRGTFRRTRAGSFIARQPTLSAKDRRLLK…
Pc-TIE-2	Procambarus-GPCRA21	FAAAASILFILVGILGNLVTIIALSRSVKLRVHATTAFVISLCASDLLFCSINLPLTASRYIHESWVLGDTLCSIFPFFFYGNVAASLLNMVAITLNRYILIAHHGLYDRVYRHHYIYLMIAVVWLFSFGMMMPPLLGVWGRLGLDPPSFSCTILKKDGSSPKKFLFLFGFLLPMIAIVVCYSAIYYKVRESRRNLVAHTNKGGSPSTFNVHIARKEDLRLTKMMLTIFLCFLVSFLPLMIVNVADDDVLVPSLHVLASVLAWASAVVNPFVYAV
Pc-TRH-R	Procambarus-GPCRA45	IGTLFQGIIFIIGVIGNVMVVIVVARNKNMATPTNCYLVSLAIADCAVLIAAVPQEIVSYYLIGNHWIWGHVGCAIMIFLQNLGINASSLSLTAFTVERYIAICHPMKAQTVCTVERAKKITLVVWVFAVCYCSPWLYLTTVVPLAYAVDYPTQECTFKLSRDQYFLYYFLDIIVFYVVPLLLSCVLYSLIARILFTSQVPKNPTVNGHHNKKRVNSPRVQVVKMLAVVVAIFATLWLPYRTLLVYNSLLAMFGYNTYKDLWYLLFAKTCIFINSAINPILYNA
Pc-Tryptopyrokinin-R	Procambarus-GPCRA26	VIYILITITGVLGNVATCIVIVRNRIMHTATNYYLFSMAVSDLLLLALGMPDEFYLLWWGEPYIFGSVFCFIRGFTAEISTNASILTIAAFTVERYIGICHPLRSHTMSQLGRVIRSIAIIWIVATVCAVPIAMQYGIVYQKTPDGQDIPNTSGCYLKKRIWVFFEVSTVLFFVAPMLLITVLYVCIAVQLKKSSRLARSVPSIGCHNCASTNDGSRNKAVIKMLVAVVIAFFVCFAPHQAQRLMALHADPTNPVAVQLFNVLFNISGVSYYIST
Pc-Vasopressin-R	Procambarus-GPCRA01	ITLLAIFVLTVLGNVVVLFMLLVRHKKLTRMCYFILSLCVSDLITAFFNVLPQLVWEVTYRFHGGGFLCKAVKFGQLLGPYLNSYLLVMTALDRYQVICYPLSNCAWTPRXFLAWALALGSCTPQVFVFSYQEVGNGSWDCWASFIPPWGPRAYVTWYALSVFIVPLFFLVFAYSCICRTLWVNFKHKQMDEHTHHWRDSRRPRLLVRLRPHRHRSESEISTCIHDPPPQENIVPLLRAPSHLA
Sv-GPCR-A1	Buckley et al 2016	IVAIVVPIIFGIIVLVGLFGNTLVVIVIIANKQMRSTTNYLIFSLAMADLLFIVFCVPFTASDYILPSWPFGSIWCQTVQYLTYVTAYASVYTLLLLSFDRFLAVVHPIAALSIRTESNAVYAIGFSWILILTSCIPLYLCHGIKKQNFEGEVYFQCAFLDKEYNHMAFHIGFITTMYFVPLTVIVVLYLMILNRLWYGVVPGGSRSAESIRGKKRVTRMVVIVVVTFIVCWFPIQLVLLLKSLDLYEMTTFRIITQIAAQVLAYINSCVNPILYAF
Sv-GPCR-A10	Buckley et al 2016	CIWILGFIALLGNSFVILWRSFYSSGNKMHSFLIVNLGVGDFLMGVYLIIVAVVDHQYRGVYAAYELSWRTSSLCQLAGFISTFSSELSVFTLTVITVDRLIVIKFPFGARRVEGSVTRMVMAGVWILVAILSGLPLTYLDYFHNFYGRSGVCLALHITNEKPNGWEYSVFIFLVLNLLSFGVMAVSYVLMYMTARDTHTAARTGAQARAGDAGMATRMTLIVATDAACWLPIIFLGIASLSGLTIPPKVFSWIAVFVLPLNAAINPVLYTL
Sv-GPCR-A11	Buckley et al 2016	AYVVVFLVSLAGNLLVIVVVYYNAHMRTSTNQYLVNLAVADLLVTLVCMWVHIVRHLSHPNYVLPAIVCKLDGFVQATSLLASVLTLTVISVGRFVAVMFPLHARTSPDRAHRVIAAVWVTAALLSCPTLFYRQLYSIKWSNFTSWQCDEIWPMEGKFDSTVSRCIITYDAKKLFYTVLIIALYFLPVGIMFINYSLVVWKLWVTQLPGEHPAPSRITATRSKKKVVKMVSVVLLVFVICWTPLQSLMLYSNFIHGQHDTLPEWFPVMEFAAYFIAYTNSALNPIIYCGF
Sv-GPCR-A12	Buckley et al 2016	TFAVIVTLMAVLGNLCIIIILFKNRLLLRTSVNHFILNMSVADLITAVAGPIPFTIRDTSDFWPLGQAWCHLEGYIQILVMVVSVTSLATISFDRMVGVVRPFHQHLKRWQSVAIILGIWVVSALIAVPFGVYRLYTVHMWKDLTERTCEESDNIRIWWIIVVIALNFLPLIVMVTCYSIIFVNFNKYANKVRGKEHPAILHLKKRVVRMMFVVVIVFIASWISFQVLQVTRSHFVNEEGSLRPELMQTYEDLLTLSQYMIYVSPAVNPIIYALM
Sv-GPCR-A13	Buckley et al 2016	YGSISLIAVVGNALVIWIVATSRKMHSVTNYFIANLALADIIIGLFAIPFQFQAALLQRWNLPEFMCAFCPFFQTLSVNVSIFTLTAIAVDRYRAIVFPLNARRSKFWNKVLLGLVWAASGVLAIPNAIALRVKHVTDTRTRELIPVCAPERINPVMMLAYSHAMVGLQFFVPLGIISFAYIRMGWELWGARTPGNAEDARDAHVLRNKKKVIKMLFIVVALFAFCWAPLQSYHVLQTVYPAINKYRYINIIWFCCHWLAMSNSCCNPFIYAI
Sv-GPCR-A15	Buckley et al 2016	AVWGVVVTAVFGNLAVMVVLMSTRFKMTVSKFLMCNLAGADLCMGLYLLIIAAMDLRTIGVYFNYAIDWQNGPGCKVAGFLTVFASELSILTLTVITLERWYAITYAIHLNKRLKLSMAIKVMVVGWAYSITMAALPLLGISSYSKTSICLPMETGDALALTYLIALLLVNGLAFFVITACYASMYCSISRHDATAPNSDLTVAKRMALLVFTDFACWAPIAFFGLTAVAGLPLINVTRAKILLVFFYPLNSCANPYLYAIL
Sv-GPCR-A16	Buckley et al 2016	YGYAMPVLLVVTTMANTIIVAVLWQHHMRSPTNAVLMAMALSDMLTVVFPEPMFFYMYTLNNHAKPLYPPAACYAWHFLHDPIPNLFHTASIWLTVALAVQRYIYVCHPPVARTWCTLPRVIKAITWIFVFATIHQAPRFFEMVYGPKEVEWRGDCVHVCSEEFNDWVHAITLDIYFPIYFWFRVVFVHLGPCTVLVVLNLLLYRAMKEAQRRRKKLLQDKNSRKECRKLRDANCTTLMLIVVVSVFLVTEIPLAVITVLHILSSMGLHFFSEKSYDILKYFFIISNSFIIFSYPINFAIYCGM
Sv-GPCR-A17	Buckley et al 2016	SFFYGSISLIAVVGNALVIWIVATSRKMHSVTNYFIANLALADIIIGLFAIPFQFQAALLQRWNLPEFMCAFCPFFQTLSVNVSIFTLTAIAVDRYRAIVFPLNPRRSKFWNKVLLAFIWTASTILAIPNAIAPRVKYITDTRTQEEIPVCHPEGINPVVLLAYSHAMVGLQFFVPLGIISFAYIRMGWELWGARTPGNAEDARDAHVLRNKKKVIKMLFIVVALFAFCWAPLQSYHVLQTVYPAINKYRYINIIWFCCHWLAMSNSCCNPFIYAI
Sv-GPCR-A18	Buckley et al 2016	VIYMLITITGVLGNVATCIVIVRNRIMHTATNYYLFSMAISDLLLLAFGMPDEIYLLWRGRPYIFGEEFCFIRGFTAEISTNASILTIAAFTVERYIGICHPLRSHTMSQLGRVIRSIAVIWVVATACAVPIAIQYGIVFDETVDGKVDPNTAACLIKKRIKLVFEISSVLFFVAPMLLITVLYVCIAVELKRSTRLGRAVPSIGSHSCSSTNDGTRNKAVIKMLVAVVIAFFLCFAPHQAQRLMAIHGDETNPMAVKLFNILHNISGISYYIST
Sv-GPCR-A19	Buckley et al 2016	GTPTAEVSSEVESSSAATEAWTTTPWNADHTLWHSHTTVNSSWTRQDLDLAGSEYDPVERNVFLNASLKNGTGNESEYDYPYEESLGTFFWGQLAPPLAVYAVTYVVGVVGNTLIIFTICRYRRLRTTTNVFLASLASADLLLILICIPVKLARLFSYTWTLGEVLCKVIYYLQALSAICSVLTLTTMSIERYFAIVYPMRAQYRCTISQAKRLSVALWLLAMVLASPVLLLQVHMEVGIRVPAYWCVRDFDSPLLWRSYETYMLVL
Sv-GPCR-A2	Buckley et al 2016	FYAVTCVVGLCGNTLVIYVVTRFSKMQTVTNLYILNLAIADELFVVGIPFLMTTSMLGHWPFGSIMCKLYMITTSLNQFTSSLFLTIMSADRYIAVCHPISSSRFRTPMISKLVSLTAWTLSALMIVPVFMYSNTLEDNGQDNCNIFWPESQGVRGEIAFIRYSFALAFGIPLCLIFVFYSLVLHKLKTVGPKSKSKEKKRSRQKVTRMVLTVITVYVICWLPYWVLQLTLILSTPKQGHSNFMVVLFMVSSCLSYINSALNPILYAF
Sv-GPCR-A20	Buckley et al 2016	VFTVFILPFNSCCNPFLYALLTKQFKKDCVMLCKTIEESRVTRGIGRCRHSSNFSNRQTPANTNSALDNSTRPDNKSCRCLNKAQETEKLHRRLRISALKYLLCHKEAEEMNSASDFSYQQSKSAIKSKRHASVSSETYSSSWSDTWRRGQAAMSLRILDRRRHNSWYLTRKPSQESNLSSSRNDSSATTASTSTWRISRSSVSSDISSSGSRGVGKTDATPTLRLGSLRDRRGETHTQIPARQITHHQALLVRQQSGISGQRSSPTTSAVRIKPRLQRQTAIERETYLPNKTLGGQCAVPCPLH
Sv-GPCR-A22	Buckley et al 2016	IFFYAAIVLTIFQKSRLSADDSTIRRSSLGYLGRARARTIKMTVSIVLAFFVCWTPYVVISLWFCFDRSAAALLDEKVKKGLFIFACFNSCVNPIVYGIFNFCKKKPPMTQTWRSTTLNTQMNSRSCDCRSFKSSRVYWSRREPATTVTNSEVTDHTAELLLPRALNSSYRTRQVGEGEYPGGSPLTTQYKNGTFYSSSSRAVPEDQNGNP
Sv-GPCR-A23	Buckley et al 2016	HGYLALMICLMGAFTNILNIIILTRREMINSTNTILTGLAVADFLLLVEYTVYASSYIKGQESLFDSYYHSVFILFHAHYTQVTHTIAICLTITLAVWRYIAICKPHLNLFLCTLPRARMAVFVAYFISPILSVPNYLMYSIHQRNDKQSNGSLYHVDFSQRARASNGLLQSIHFWFYSVLIKILPCLLLTFLIYHIIRAMYTAKRRKENLIKMGTPSMETERKLPRMEKLTEKTTRMLLTVLLLFLATELPQGILSLLSGIYGHSFFRQCYLHWGEVMDLLALVNSAVNFLLYY
Sv-GPCR-A24	Buckley et al 2016	PPFLAVVAIWVLSVCSVLPYAVYMNYTDLQVILGAQFDGVGICAVNVGEDKTEYIRGLFITLFVLPLALITFLNVRVSVVLANLEAPVGLAMLDPGSLASQQQVWSPRDYRFFPSTFTTEADGRDGCHYHSAYQLPSFSPTPTTVGGGSQTPTLLGSRGPPTPSLQQLEESEIDVAREKRNQRYIVTIVTAFALCLCPLMILRLVKNLVVETAENSAYFDVTFISIVWLAFLPTLTTPALFADW
Sv-GPCR-A4	Buckley et al 2016	IIYSVMFVVAAVGNLTVFITLFRNRHRKSRVNLMIMHLAAADLMVTLINFPLEVGWRITTQWVAGNLACKLFQFLRAFGLYLSSLVLVCISLDRYFAIVHPLKVNDAQRRGKIMLCFAWSTAAVCSLPQSVIFHVDTHPVFRNFRQCVTFGFFRTQVEEMTYNLFCLAAMYFLPLFVIIVVYLRILWEISQKSKDSKEEASSRRGRNGRMRLRRSDMTNIERARARTLRMTVIIVLAFIWCWTPYVVIVMWLVIIVGGFLSLVIIPSKSSPTLVG
Sv-GPCR-A5	Buckley et al 2016	RVNMMIMHLSLADMIVTFVFLPTEITWHITIEWVFGNFGCKIYKFFSAFGFYMSSMVLVCISLDRYFAVLHPLKVNDAQRRGKIMLFFAWLISAVISLPQSVIFNVQPHPKYADFHQCVTFGFFNSNNGGEMMYTIFCISFLYFIPLSIIIIAYSRIILEISRKSRDTQHDYSREERYHGRLQLRRSNMSNIERARTRTLRMTFIIVMAFIWCWTPYALATLWNFIDPVTFYSMNKHVQDILFIIAVSNSVVNPIIYGRYSISC
Sv-GPCR-A6	Buckley et al 2016	IVPILFALIFIVGVIGNGTLIVIFARNRNLRNVPNTYIISLALGDLLVLFFTVPFVSTIYTIESWPYGNFECKFSELVRDISVGVTVFTLTALSADRYLAIVSTVRRAAGRAGRRTIRAAVGIWVAAGVLAMPAALSSHVQVFQVTEEKVISVCYPFPESFPEWYARANVIVKALLFYLLPLVVIATFYLLMARHLLSSEDVPTESHVFHRHLRTRRKVAKIVLCFVLIFAICFLPTHVFLLWFYLDPEASIKYNEFWHVLRIVGFCLSFMNSCINPIALYCIS
Sv-GPCR-A26	Buckley et al 2016	AVWLVIVATLVGNLTVLGGRVLSGDDNKILSLFIRNLAVADLLTGFYLAVVAVKDMQFRSEYHKHAYYWMTSWQCTVTGVLAMTSAEVSVMILSFMSVERWLCITWPLRAPKLSLGGAKVSLTCIWVVGIVLSTAPVYYYKGKQRFYGSNGLCFPLHLDDPWVPGWFYSAFIFVGLNQLGVVLILMSYTGMFYNIRRTRANTPLSLGDREFAMRFFFIVFTDCLCWTPIIILRILALAGIEIMPELYAYVVVVVLPINSALNPFLYTFT
Sv-GPCR-A7	Buckley et al 2016	VVYGILLTTVGLLGLAGNLISITILSRPKMLSSINCCLIGLTSFDMIVTTTSVLMFGLPEISEYTHTMEWYTQGVYQRVTPFVFPLALIAQTGSVYLTVTVTVERYIAVCRPLRARSLCTYGRAKVYVLCVALFSILYNLPRFWEVSYKECKNDDEVWLAIVVPSALRQDPYYIQIYIMWMYLLVMYLVPFLSLMIFNFFIYREVRAANHERQQLSRLQKKEIGLAVMLLVVVSVFFLCNVLAFIINVLELLDIAIDELTMSSNLLVTINSSVNFIIYCI
Sv-GPCR-A8	Buckley et al 2016	LLPPLVCLGILANGLCIVILTRPSLRSARVNGYFLMLAVSDLLVCVFHIPVITSITGCTFDSYAEAFYFTHFGWTLLGMSQALGTYTIVWLSLDRFIAIWAYDLYPRIQQKPNVMRNRMLVTGLLCILFHLVLVVDAKVSCSNPDPSDVLCTGGRWVSVSGYENNFDQKWHRLYLAAFGMFIRWVPCCLLLVFNVGLVAGVVRGRITFPGAQESGRGGEKTLIATTIAITATYILFTFPITVYIMGYNTQVEDRCSGEHAKEVLRAVGNVFQLLEHVIHIGFLIGLYHGF
Sv-GPCR-A9	Buckley et al 2016	WIVFLLALMGNGVVVVVLVAAYAKMDVPRFLVTNLAMADFFMGVYLGFLAVADASTLGEFRMYAIPWQMSPACQVAGFLGVLSSELSVYTLAVITMERNYAITHAMHLQKRLSLRQAAYIMLVGWIFAITMAVLPLAGVSDYRKFAVCLPFETDGAGLGYVVFLMFINGVAFLILMGCYFKIYCAIRGSQAWNSNDSRIAKRMALLVFTDFICWAPIAFFSLTAAFDIHLISLEEAKVFTVFVLPLNSCCNPFLYALL
Sv-GPCRA14	Buckley et al 2016	IGTLFQGIIFVIGVIGNVMVVIVVAKNKNMTTPTNCYLVSLAIADCAVLIAAVPQEIVSYYLIGNHWIWGRVGCAIMIFLQNLGINASSLSLTAFTVERYIAICHPMKAQTVCTVERAKKITLLVWVFAVCYCSPWLYLTTVIPLSYAVDYPTQECTFKLSRDQYFLYYFLDIIVFYVVPLLLSCVLYTLIARILFTSQVPKNPTVNGHHDKRRANSPRVQVVKMLAVVVAIFATLWLPYRTLLVYNSLLAMFGYSTYKDLWYLLFAKTCIFINSAINPILYNA
Sv-GPCR-A27	Buckley et al 2016	WVVYQVVFPVLVALGVVANLLNLIVLSRPAMKGVAYRYLNHLAVSDLLYLVFNVPFCMRDFAHISEMKVVSKASAVYYANVGIPLVNMFLTMSEYIVVWLSYDRCLAVCSPRKFSAKQRLEVVRIRCGMSLLLTMFVYSLSPLRQTYQCEGLECCVSESEYADEPWYMGYEFFREIYSRFLPAILVTAFNVAIVVTLKQIKRGREGPDVTNEAREERERRLFFLLMAITVLFYISAFPSAIYKVLMFNDMTFIPYFRAVADVLEVSGHVFNFVLYF
Sv-GPCR-A28	Buckley et al 2016	VVAPIIVSVGMLGNLLTIFILRLPQFRGVTYTYFLMLAMSDFLSLFFCISFLLHVLHEGTHLYSTAVWYSYCEQLFVNIPMSTSVLIIICVTVDRYFSICRPTEFKRIHTSSYARAGILGSMLIAAAVWLPTCALKKPKLYDDCETSSFVAPDNRTWWVACMVPDIRNNPYYIAYAWIRQTVVSFIPIVILILLNILIVREFIRLRKKKDHRFVAGRHHHSTLAERPRREDQHLITLLTAVMISFFITMVPAGIFNALYTEVFATKLQFEIFRAVANNLEIVNHALNFYIYI
Sv-GPCR-A29	Buckley et al 2016	FLVPTLISVGVFTNLLNVVMLWRAGRQQRQRQAQATTFSYLLWLAITDMLASLSLVPSIVHFDRTQLSYAWAFYYAHFEIPVQNALTSASVYIVVGLSVDRYVAVCHPRRYQAVSAPNLALIRITLSLLVPVVLYIPHGFSQEVQLNETSWSYTYDATEMADPRAWYVWTVVVELCHRMAPATLLVILNFCIIYTFKQVTARRRNITKNKGAVATQASNASRRSEDDVRSQQEQRLVYLLLAIVAAFLLTTLPAAVLALIDTEGPSHGSFSHEVFRAVANCLEVLGFSLNFVLYFIF
Sv-GPCR-A30	Buckley et al 2016	VVLPLVLAAGMIVNGAGLVLLTTPRLRARPANRYYFLLLSSDLVVLVASVPTSLTLNGCRLWSYGVALYLAHSCNTIFYIAQAFTLYLILWISYDRFLGLWYFKRFQDMQTRRVFRNRVVLTVLLCLATNLQHLLEVEVRCTGYTHDLDGMCKAGVWVIDDGLHYLGRKSLLANLLWVVRGLVVLVVPVVLVLAFNAGIVAGLVCRRLHNSAVTLRTRRQALSSIYIVLALSATFLACTAPITVYSAFYADNITNCHGSSAEEIFRAVANLLIIGEHLTHFLFL
Sv-GPCR-A31	Buckley et al 2016	VFIIAIVGTVGNLLAAASLLLSKKLRQSPSTAFMVNLLVCLLPVCAIGMPMFGFAFLAVRDYERIPYTEGVAVATFAMGLILSQVHIHTISAMAFNRLMAVMWPVLYKKVMQPRKVRLYLLLLWLYSALLWVPLFFGVIGKLEVETEELMVSMKDESLHKIKKAIHIFFTYLLPIAFSSVCYIAMYLKVRHSRQKKVARQRCKSVMETSEDTVLRLWDDHVTRTILVIFLVLLSCSVPHVVIHVLHLHKKLPATWLLLHVVFWLQFCVDPVVYVCM
Sv-GPCR-A32	Buckley et al 2016	VATVIAVLFIGYLVLGLTGNFLTILALLRCPRVRNVTAAFIISLCVADFLFCVLVLPWEVSRFLAGKWIWGEGWICTLFPLLRYWNVAVSLLSIAMITINRYIMIAHFSVYKLVYRKAWIALMIAFCWVFAFVMLLPTLLSKWGRFGFDRRLQTCSILDDNNKSPKQVLFGLGFCVPAIIIVICYSLIFYVIHKSEKRMRQHSSHSMNGAHPSGPSLQPQPRVPGKVEREARRRRNEWRITKMVLIIFIAFLITYLPITLVKNLDKKVDYPGLHVLGYVLIYISSCINPVIYVIM
Sv-GPCR-A33	Buckley et al 2016	WAIVLTALAAIIISILGFFGNLLTIMALPHSSRLRNAATWLVVNLAVAEGIFCVTILPISAAHLLTLYVTGGRPLLNDTGCSVFVFLRYVNIQAELLSIAAIAVNRCVLIAVPKQYPRLFSGQKTAGLIASIWLVSALLMLIPLLQVYGKFVYNHRTDECDFSDETQHGQAPRKLFLSLGFLLPCIVIIASYSYIFYKARQSSAKIRAASSAGLLKQTSTSSNPSRPARPVEGLRSRDIRIARTIGVIFVAFLVCCTPVSVVHYLDATIHRPLLLLLLHPLYWAQYCINIFIYVFM
Sv-GPCR-A34	Buckley et al 2016	IFAAVASIIFIIVGIMGNLVTIIALSRSLKLRIHATTAFVISLCVSDLLFCSINLPLTASRYIHEAWVLGDALCSVFPFFFYGNVAASLLNMVAITINRYILIAHHSLYDRVYRRHYITLMIALVWLFSFGMMVPPMVGVWGRLGLDPPTFSCTILKKEGSSPKKFLFLFGFLLPMVAIIVCYSAIYYKVRQSRRNLVAHGNKSGSSSFSAQVTRKEDLRLTRMMLTIFMCFLLSFLPLMIVNVADDDVRVPSLHVLASVLAWASAVVNPFVYAV
Sv-GPCR-A35	Buckley et al 2016	LLELWGTFGLDPAIGSCTILPDRDGNSPKEFLFVFAFVLPCVAICVCYARIFFIVHRADRKSHSHGQTLIKVNGKRHKHVHPPCRDPPTLQTLHATPLQDRLQLETLVKLSTSSNSVQVEILEPGEKSQREKKSDRKREENSGGEGGSSKDVTRTPSPVSTSRNVSTDGNSLLKTEVNGFSGHTSDEGVGAPELVTCSPIRICPPSAPDSPVSDKSETKIRSIERRPSTISGKGGGGTFSQL
Tu-AllatostatinA-R	tetur17g01230	LVPLVFSIIVVIGLLGNSLVVIVVLWDDQMRSTTNVLIFNLAVADLLFIIFCVPFTATDYALKYWPFGDIWCRIVQYLIYVSAFASIYTLVLMSLDRFLAVVHPIASLSIRTEVNAYRAITILWIAIIFLCLPILIVHQVHVDLDSETSHLCHINPAENKFFAPSVFLSSYAIPLTLAFVLYVYMLKRLWHNDIRTGRSVRNKRKVTRMVVVVVVIFAICWGPIHIVLTLRSQGMFEPDSKFKLVTLIVSQILAYINSCINPILYAF
Tu-AllatostatinB-R	tetur06g05960	IMPFLLIVTLITNSLVVIVLAQREMRTPTNLVLLAMAISDMLTLLFPSPWYFYNYTLGYHSKILHPPVACYAYHCMIEVIPAFFHTASIWLTLVLAGQRYIYVCHPTVAPKYCTPPKVARAIVTVFVLSLIVQASRFADRDFQEVTLDSDSGPVYGCRFFTATWVKRLFSEDAYYIFYYSFRIIFVNIGPCTALVILNLALFRALRRAQHKRKKLFQENRRSECKKLCDTNCTTLMLIVVVSVFLATEIPMAITTVSHVIQNSLDIHIASYEYLNLTILFSNFLIMLSYPFNFAIYC
Tu-AllatostatinC-R	tetur01g16794	LYGIVCLVGLCGNTLVIYVVLRFSKMQTVTNMYIFNLALADEMFLIGLPFLIATVKYKSWPFGRLMCQIYMITTSINQFTSSLLLTVMSADRYIAVCHPISSPRYRTPFIAKFICLTVWTVSALLMVPIFMYANVLSHEPKNTLSCNIVFPENEYMNGQKAFTLYSFTLGFFIPFILIFLFYFLVICKLRTVGPKNKSKEKKRSHRKVTYLVLTVITVYVGCWLPYWIGQVYITFQKPNVRHSDLCVSILLLAGCLSYANSAVNPILYAF
Tu-Allatotropin-R	tetur23g00700	IFITLHTLVFIIGLTGNALICLFVYRNRHLRNVTNYFIVNLAVADFLVILICLPPTVLWDITNTWFFGDLMCKLVVYFQFVSVSVSVLTLTFISVDRWYAICRPLKFKSTITKTRVAIIFIWISSLAINLPDLIHLQTISPFHRNETIYYTDCVHDWSEETEKIYQLWIVTTYFILPIILMSVAYHQIAIVLWNKNIPGSCETGQHHHYSNRHSNHNSHNHSQDNHPDASSIEMNSTIAKRSDCVQGTRSKSKPSYKSSVENSHFGASTNGGNSRTVTKNTSKYPYDSQVTSRQRVAKMLIAVVIMFGLCYLPVHVLNTLRCFIAIPQNDVISILSLSSHWLCYANSAINPIIYNFMS
Tu-Bursicon-R	tetur11g03260	WIVFLLALLGNGVVVVVLIFGRSKLDVPRFLVCNLAMADFLMGIYLGMLAVVDAATLGQYKVYALPWQRSFGCQIAGFLGVLSTELSVYTLAVITSERNYAITHAMHLNKRLSLKHAAYIMAVGWTFALIMALLPLFGVSDYRKFAVCLPFEITDIWSRTYVISLIVVNGLAFFILMGCYLRMYCAIRGSQAWNSNDSRIAKRMALLVFTDFLCWAPIAFFTLTAIAGYELITLAEAKVFTVFVLPLNSCANPFLYAIF
Tu-CCAP-R	tetur35g00370	LWIIFVMIVFGNCSVLGTLLLSKGRKSRMNFFIMHLAIADLLVGLINVLTDIVWRFTVGFYTGDTACKAIKFAQVVVTYGSTYVLVALSIDRYDAITHPLNFTIRARRAKFLIAFAWTLSGIFSIPTLFLYKIHNIEDKPQCWIHLEPEEWQIYMTLVATSLFFIPTVIISACYSIIVHTIWTKSRLMGSSPRKKVKPDLDFKRMSSRGVIPRAKIKTIKMTLVIIFVFILCWSPYFVWDLLQVYQQIPRTQTTVAISTFIQSLAPLNSAANPLIYCLF
Tu-CCH-amide-R	tetur03g04250	YIVPLIFGILFVVGLIGNGTIVYVFLRNKTMRTIPNTYIISLSIGDLLIITGSLPFVSTIYSFDSWPYGSFLCKLSEFFRDVSMGVTVFSLTVLSADRYMAIVLPLRRFTSSRHKELTLAIAGFIWLVSCLLAFPGAYNSFVLQLSITPDKTIYVCYPFPASLGTNYAKFIVLTKFIILYALPLFIISIFYLAMARYLLSSTGPSGFSNSANQTHLRLTKARTKVAKTVLSFIILFAFCFFPNHVFMIGFYFYPNLFTYLTPFWHYLRIVGFILAFGNSCLNPVALYIVSGSF
Tu-ETH-R	tetur30g00050	ATLFCALILILGTTGNILVPIVVCRTKELRNSTNIFLINLSLADLFVLIVCMPTVLIELHSKPEIWLLGQEMCKAVPFVEMVVAHGSILTMMAISFERYYAICKPLKAGYKCTRLRAVIIILSVWAIAIISTIPILWIAELSHETYIDGSLVPVCLTQANKLWHKLYFIGTMIAFFWSPLLILIIIYIVITKRLFLNDENIRTSTNHGNHECGQMRARRQVVYMLATVIACFFICLLPFRLFTLWLLLSSTDQVKSLGMELYYTTLYFCRIMLYLNSALNPILYNLI
Tu-FIRFamide-R	tetur01g16804	SVNLTLMNKSHSWTPTELINLNPSSIDPPLLFDLSLAHGYSNPEDLPPLVIPPISHSTPTNHHHHQHSLPPSPGYSTELPDDPLNYYVTFVYPLALISQTGSIWTTCLITAERYFAVCHPFRIRTFSNRNRAIWAVVFLSLGAFLYNIPRFIEIEVITSPEGIRSVRQTALRQNRLYYWLYYICLNLALLYIIPLSLLTALNTEIYKAVRRASRNRATLTNQEETELNIASMLVLLVSIFIACNAPAFVVNCMEFFNAPGYEMATIFSNLLVCLNSSINFVIYCI
Tu-GnRH/AKH/ACP-likeligand-R-1	tetur02g09980	LYAYCILFGIGSFGNFYALKDLVKARQLSQYINLLMAHLTFADLCVIFISLPIEIMWRITISWNAGDTSCRVIQSVRLFGMYLSSNIVVCISIDRLHAFTRSSRTGYRKYSKTFLISAYILALFLSLPQAAIYRVEYHPSFPDYAQCIQARWFVDSKLEKFYIAMCLLGMYFVPLIAIVFCYCKIFFHLHFDGQSIQFQDALYALQYRAVDARDNKDIRRVIARHHANRYSIILKAKRRTLKMTLIIVIAYLICWSPYACLILYYSFDYKSAQDIDPAIQEGILLFAVAHSCVNPFV
Tu-GnRH/AKH/ACP-likeligand-R-2	tetur13g03110	YVFLFTIGGSANAYVVYNLAWGKRLTSTRHEKLLLNLAIADAIVTLVMTPTEIAWRITASWKAGNLMCKLFQFYRLFGIYLSSMVLICISIDRLLAVYSPFKYQTYDIFVKKLLIVAWLLSFIFALPQIFIFHVESPSEFPGFTQCVSFKSFQTETQLRMYNIFCLSIIYFVPLLCISLCYTFICVKIRRKMVRRFLTVFRNGDLTTVVNPEVQHSETIGFTSNQLQSAQNCHSPHPHSNANGCDLTTEGATLTRPSSSSAPVAPVTTPSRGSLRCIVLPVSSASRQRQKIGSKIVKDTVIIIAAFIVCWTPYATIHLWYQIDWSSAFQVDKSLQGVLFLFAISNSCVNPYIYG
Tu-GnRH/AKH/ACP-likeligand-R-3	tetur06g04150	VLYSLLFVSGAIGNLWVFFKQRQKCQRDARINYLLRHLNYADILVIFGTILIEIIWRITVYWHGGEILCKLVQTFRIFGVYLSSIMLICISVDRYFVFVHPLSFINREKRKKILIHASYVVSAVSALPQAFIFHIKRHPRYPEFAQCLSSGYFDAEWKEKVYQIFTLCIMYFVPFFVTLFCYIRIIAALSSQRELNVSRPTNDGEQRINVYQRAERRTLRMTSIVALAFVCCWTPYTYVVLWFQFNPDSYQSTNILIMDVLFCFAVLNSVINPCVY
Tu-GnRH/AKH/ACP-likeligand-R-4	tetur02g03910	TSYLCLFFLGAPANLIVFYNIFKTSAYKRTRNEFLLSNLVIADSIVTCLMIPSEILWRFSITWIYGSIACKIFQFYRALGIYSSSSILVCISIDRFIAVIYPFKYTSCAPLVHKCVFTAWIISVTASLPQMVLFNVQAHPELNNYYQCVDFHSFGEEWHRKLYNIFSLCVVYVIPLLIIIICYTGICIKLFANSRCLGNVKAALDDCWNNLSSIEPASSSSSSSLNHNHVTQSHHHYQQPHRSTASYTRETESLEILPAPESSLTAKRQKIQSRVLKEAFIIILAFIICWSPYVIAVIWYQIDPNSARQINENLQAILFMFAVSNSCVNPYIYG
Tu-GnRH-likeligand-R_	tetur17g00970	IILYTLLISGSLTNLFALFQIAFKNHHKTGSNILLLNLVIVDLFVVLFTIFPQILWCQSISWEVGQIACKLYQTLRNFSLFSSSFMVICISYNRYYLLKEPHIFQKEKQRAYRMLKITYISSFLLSIPQFIIYKVQPQPDHKFNQCVGFTFFTSQWQLRAYNFYTLLGMYLIPLQLIILLYSKIIASLNLDKYVVARMSKSASSEERLSQKTNCMLKTKRKAISTFLAVTISFTVCWTPYAFIVLWQVFSGQDEIINPVFTSLMYMFALLSCTLNPIVNSSHLY
Tu-GPA2/GPB5-R	tetur01g15880	IISIAAVLGNLAVMVVLMSGRFKMNVSKFLMCNLAFADFCMGIYLLIIAIIDIHTVGVYFNYAIDWQHGLGCMITGFITVFASELSIITLTVITLERWYAITHAIHLHRRLKLNLAVKTMIGGWIYSLLMASLPLFGISGYSKTSICLPMENKDTVDIIYLITLLSFNALAFLLITACYGKMYHAVASQHGRITANDQTIAKRMALLALTDFACWAPIAFFGLTAVAGYPLINLTNSKILLVFFYPLNSCANPFLYAIL
Tu-Leucokinin-R-1	tetur02g07280	TSIYLLVSLCAVIGNSMVLWIVIKSKRMRNVTNFFIANLAVADLVIASLAVPFQFPAALLQRWVLPHFMCSLCPTAQVVSVNVSIFTLVAISLDRHQAVTRPLATRMYKKSALFIIAFIWLISLLLATPTFVAWEVRYVWSTESSNYTEPFCDTSSVSSDFWRHYNHFLVALQYFIPLFVISFAYIHMAVILSEVDATTAKRNDYMRALQNKRRVIKMLFIVVALFAICWLPFQLYNILQEIYPSINEYKYINVIWFSCHWLSMSNSCYNPFIYAIYG
Tu-Leucokinin-R-2	tetur03g03420	VLAYGIVSLTAVIGNTIVLCCVVGSVRLRTVTNMFIANLATADILIGALSIPFQFQAALLQKWILPPFMCAFCPFIQIVSVNVSIYTLVAIAADRYLVVFAPLHCRINKYRARMIIIFIWAWSVIAAIPALIALRVRLVPDLESAVDSHDDKWLRSLVTGNLTIPTRPSCDNIGMSESIWRGYNQFLVVIQYFLPLGIITFAYTRMASKLHGQEKSGSSGLISLDNNKSSHQGDSVFRNSQLVTSYHLTTADAEYIVTHKRKVMKMLIVVVALFALCWLPLQTYNLLKDTIPEINTFRYINVIWFCCHWLAMSNSSVNPFIYAI
Tu-Myosuppressin-R-1	tetur35g01370	HGYLSLCICFFGTVTNILNIIVLTRKELLSATNNILTGLAVADMLVMMDYIPFAIHNNIQVHQGDGEMFTYGWTVFTLFHAHFTLVVHSISTWLTVLLAVWRYLSVRFPTQSRGWCTMSNARWLIVATYICIPIFFIPTYLTFVVKDNGAGGYKVDWSDISINHNETLKRINFWVFSVGTKLVPCILLTYLSWALIHAVLEADKRKRRLKENCYTLASSSATKSEYSEDSLGSLHQPGQVYLEVNSFRKVRHHSTSINGSTPGAPVNLTPASGTTQSDRTTRMLLGILLLFLATEFPTGFIALLTGILGDDFFHNVYYPLGDILDTLALINSAVNFVLYCTM
Tu-Myosuppressin-R-2	tetur38g00540	HGYLSLVVCLFGLVANVLNIIVLTRKNMVSPTNAILTGLAVADMLVMVDYIPFSIHNHIRHEQPPTELYSYPWTVFTFFHAHFSVVFHSISTWLTILLAVWRLLSVSYPTRSRTWFTMRSAIISIISIYLIVPIFCIPMYLSFTISPVEDTIGIYYRIDWSELSLKNDKFLKNLNFWVFSVGTKLVPCILLTYFSLAIIKILIEADKRKARLRSSYNNNSKPDLLTPTATGTGTTINDNTNDSRRWSCSPACDPASTINEATNKIELCQSKKMNNKSKRGSASTGSQLDNNNLTNSSQQQHLLHPDYPHNNPSPQHQHHHHSHHHNHHHESSQAHDRTTRLLLAVLLIFLLTELPGGILIVLSVFLGENFFQTVYSPLGDLLDILALINSAINFILYCTM
Tu-NPF-R-1	tetur18g02210	AYIILIILGATGNGLVCMVVIRKPSMRTPRNVFIINLAISDLLLCLFTMPFSLVEIVLKFWPLGEATCKLVAGLQATSIFVSTISITAIALDRYKVIVNPNCEPCHPINTFITLSAIWITALALSAPLFIYRTVESHSINILWLKSIDYCIEKWPIEHGRALYSIFSMIFQYVCPCIIVTVAYIRILRKLNYRMVQKKMGTTLAEKQRREKIKQRKTRLLLISISFIFGISWLPLNIVNIVADIYFPFDNSQVYRILFACCHLAGMSSACSNPLLYGFL
Tu-NPF-2-R	tetur01g14930	SYILLIAVGSIGNGLVCIAVIRKPSMRTPRNLFIINLAISDLTLCLITMPFSFIEIAAKFWSLGLFTCKLIAGLEATSIFVSTMSITAIALDRYFVIIKPTPETPKITGILYGLLSIWIIALILSIPLFWSRTTYRIEVPEILSSADHSKETLEYCYEEWPVNRGRAIYSVFTIVLQYFVPTILVTLIYMKIYKRLKNRMSQKRTAIKLDERIKAEERRTKRTNYLLISVSLIFGISWLPLNILNIISDVYYPFQDTSTFRIVFACCHMVGMSSACFNPLLYGW
Tu-Dilp-7-R	tetur15g00150	SVWVVAFIACVGNVFVLIGRMLMHEPNQVHSFFIKNLAFADLLMGIYLFIIAYYDASFRGQYIKHEDAWRHSWQCNLSGFLSTLSSESSVFILTVITVDRYASVIYPLSQKRRTKGFAISCMVAIWTGAVVLALLPLLTDDLFGDEFYGNNGVCLALQIHDPFSKAWEYSTFLFCGLNSGAFIYITYAYINMSLTIASSRLGLRTTQQQQDRCITKRFGFIVATDCLCWMPIVIIKILALAGVPINDDLYAWVAVFLLPVNSALNPVLYTL
Tu-Relaxin-like-R	tetur15g00700	SVWIVAGITCAGNTLVLVWRSMAKKEHQSLSLLVKNLAIADLMMGIYLVVIGSYDQVFREKYNNYALQWMHSWKCNFCGFLATLSSELSIFIVLMITIERYRSITMTCRLVTLRWTASILLLIWTVSLAVSLFPILYWSDPEDPLYYASNGVCFPLHLEDPFMFGWQFSTFIFLGINLPAIVAIIGLYTRLFLVIKRDRQLTRPALLGKADHEDVILAFRFFCIVVTDCLCWVPIVSIKIFSFTYMYISPKVYAWLVVFILPINSALNPMIYTI
Tu-Periviscerokinin-R-1	tetur05g02400	IYAIIFVTGSIGNVCTCIVIKRNRYMHTTVNYYLFSLAISDLLLLNFGLPPELYALWRKYPYIFGKWFCILRAFTSETSTNASILTITAFTVERYLAICHPLRAHTMSKLSRAIKVILIIWAISAIAAIPIAYPFDIIYMVKHNNGQVNKESAICSIASPVEYLFEVATICFFVLPMGIISILYILIGIRLRRSSSITSRADSNGDRSPDTHLPNGSKDPTLYNQQSYKQHLDKRRAIVRMLVAVVVSFFICWSPFHAQRVLAIHVAEKSPKFVQTTLIVLTHVSGITYYLTATINPILY
Tu-Periviscerokinin-R-2	tetur14g02540	TFVYSLIFILGVIGNTATILVILRFKYMQSVTNLYLLNLAIADLLTLCAAMPLELYQLWHQYPWELGGLPCLLKVLIPETTANASILTLVAFTLERYSAICGSPKTPPPNINSSSSTRNRFTRNTVLIWLLGLLGAVPLALYTRINYLYIDDEPLIESAWCGLPFNDPDRTWETIMLTSTIIFFIFPLLIICLLYYFIAITLKKATRLDPIGNIDIHLNDQRCSRKIMQSRKIVIRLLVAIVIAFTICWTPFHAQRLLFLYVSLYSEWSNKLRSVNQILFLLAGVFYYLNSSINPILYSVM
Tu-Periviscerokinin-R-3	tetur26g00650	TVLYILILLAGVIGNISTCIVIARNKYMRTATNYYLFSLAISDLLLLICGLPQELYLLWRRRPYIFGEFFCIIRGLSSETSSNASVLTITAFTIERYLAICHPLKAHTMSKLSRVIRLIIFIWICALLGALPLALQFGLKYDENIIDGSSSISAIESTAECTVISPIKHSFAISSLIFFIIPSLLLTVLYLSIGLHLRQSEALKRNQPDKCNCCSWFKCRSQLLKSATQGLRHSPSIHSNNVGEDENEQEEDEGDNNNCESKKSVHSSNNFVLAKYHTTLLTRSSSLYSKFKPSPPCIRYTDSRSPSNHHLHNTNPHHHSHNKHNNQTHLHHSHYPHHHYHNESSASSSSRRAVIKMLVFSPFHRFLVAVVVAFFMCWAPFHAQRLMATYASGSTQAEI…
Tu-Proctolin-R	tetur06g01960	LVPLVMIIGVIGNSMTIVIMTRRRMRSSTNFYLAALASIDMMYLIFIFILSLKHYPDADHSTFYYYWVFYPFSLMIVDGCSNISVWLTVTFTFERFIVVTHPIRGKVICTEARAKKVILAVFIICFTYVLPTPFEWIIVEKLSPLDNSTRIDVRYSDFGRNKTYRTIYYWTTSVLFTFLPLTLLAFFNAFLIRSVQLSRRARSEMTQSKITTAYSTVSKSDPDPSPRLGRNGVVASGTSSGSNKVDHSTAQETKITIMLISVVVLFLCCQSPTAIMLIYSSLRDDGRNTNEYYLHIAWNNIFNFLVAVNAAGNFVLYS
Tu-RYamide-R	tetur08g06060	FMYSSICVIAITGNAIVCFIVIAYRRMQSVTNYFIVNLALSDILMASLCIPFTFVSNLILQHWPFGAFMCVLVSYSQAVSVFISAYTLIALSLDRYIAILYPLRPKMTRFQAKLIIACVWIVALITPLPTAIVSKLVQPAVWVESGITDRYTCTEDFANQTYRQVYSLALMILQYFFPFVVLLYTYTRIAIAVWGKTTPGEAEDARDKRLAASKRKMIKMMITCVTAFTLCWLPFNTFIVVGDNHPEIFSYSYIIYIWFACHWLAMSHACCNPIIYCWM
Tu-SIFamide-R	tetur18g00990	AYTIVFILGIVGNSAVVAVVFRSPRMRTVTNYFIVNLALADILVLLFCLPPTLLGHLFIPWILGLFMCKAVSYLQGVAVSASINTLVAVSVDRFLAICYPLKCQMSRKCARRMIIIIWLFSLAIAFPWALYFTLHPIPETHSEMMLCIESWPDELSERLYFLTANLLLCYLIPLTVITCCYIAIWLKVWRRHIPGEKGIKTGKNLNTQMDLVMQRSKLKVAKMMIVVVVIFVISWLPLYIIFARLKLGGVIEENSIEEKIFMTMTPIAQWLGASNSCINPILYAFFH
Tu-sNPF-R	tetur29g01220	YCLYALIFLVGICGNTLVCYVVFRNKQMHTVTNLFITNLALSDILLCIFSVPITPLYLIFYKEWVFGRILCHLVPYAQGVSVYISAFTLMSIAIDRFFVIIYPFKPRMRINVCLTIITFVWISAALLTLPYGLFVKMASDQDERWLCDEFWPVEESRKAFGFSTSVLQFVIPFTIITFCYIRVCGKLRDRARSKPGEKSVKKDEIERERTKRTNRMLIAMVAIFGISWLPLNIHNLVTDFYIPASEWRYFKPFFFLVHAVAMSSTCYNPFLYAWL
Tu-Tachykinin-R-1	tetur21g00830	IWSIVFGLMILVAMVGNTTVIWIVTGHRKMRTVTNVFLLNLTIADLIMATFNGVFNFVYMLHSHWPFGQTYCKINNFIANVTVASSVFTITATSIDRYIAVVHPLKPRMTKHQVMLIIIMVWSLAALLSLPNLLYSELFTIPFQDGGYRVVCILVWPDGYAGQSTLDYLYNLTFLAITYVIPMISLIITYSLMSRVLWGSKGIGEETDIQRESIRSKQKVARMLIALVVLFAICWLPYHAYFLYSYHYPHINQSVIIQHIYLFSYWLAMSNSMYNPLVYYWM
Tu-Tachykinin-R-2	tetur01g08520	IWTLVFGGMILVATGGNTIVIWLVLAHKRMRTVTNYFIVNLSIADIMVSTLNVIFNFTCMLNGDWPFGTLYCKISNYIAIVSVSASVLTLMAISIDRYVAIIYPLKPRMSKKTTVFITLAIWIIGSILSLPNILYSTTKREYFLNGDYRDICFLDWPDGPATSSKFDYIYNVIILLVTYMVPICSMCFTYSRVGLELWGSKGIGEYTEKQVESMKSKRKIVKMMIVVFVIFAVCWLPYHGYFLLTHHFPEMMEADYVQQIYLIIYWLAMSNSMYNPIIYCWMN
Tu-Tachykinin-like-R-1	tetur06g04340	FWTVIFSLNVISSIIGNLIVILIICGYKQMRTKTNLFLLNLSVADLMMATFNTMFNFIFMLKSHWPFGTTYCIINNFLSSVATSSSVFTITVTCFDRYMAVVHPFKPRMNRTTSLIVVLLIWLLAGVLAIPTVLYSTTYELSYQDGSRVLCWIKTILSCLRRLHSNAENIYNVVFFVVTYAIPMFTMGLTYTRMSFVLWGSKQIGEMTSHQLEAIRSKQKVVPMLIIVTIIFGLCWLPYQIYFLVVFYIIELGQKEYVQHIYLAFYWLAMFNSSLNPIIYCLL
Tu-Tachykinin-like-R-2	tetur07g03180	IWILLFTGIITVTVIGNALVIWIILAHIRMRTITNLFLLNLALADLLMALFNTAFNFTWMLNSHWPFGSVYCSINNFIAHLTVFSSVFILTVMSIDRYIAIVRPLSSRMSRRTTLITLNLIWIIGAIISLPNLLFSMTVTYIYPDGSLRTVCLLKWPDGFAGYSSFDYIYNILFLVITYFVPVITMAATYPQMISVLWGSQNIGEITERLKSAIKAKRKIVRMLISVVFIFVICWLPYHIYFLIVFHFPKISHYKNIQNIYLAIYWLAMSNSIYNPVIYY
Tu-Tachykinin-like-R-3	tetur33g00660	IVVYVIMIMMALLGNLGIIWIITGHRKMRTVTNIFILNLSIADLITSMLNITFNFIFMLSGQWYFGYFFCKINTFIAYVTLSASVFTIMALSLERYRIVINPMKPRITKTTCVACLILIWLFSFLLSLPTIVYATYITYDMNGNYTRKICLLQWPDGLPGRSEADFYFNLVIFAVDYAIPMVLMSVTYYRIGRVFWGSQAIGELTEGQREAIRGRQRVVTMLITVTVLFAICWLPYHIYFIYIKYDPNIITHKYISNIYLTIYWLAMSNSAINPVIYAIL
Tu-Vasopressin-like-R	tetur16g01950	ITLSAIFVMIVFGNTSVLLALILSRIKLRRMYFFLLHLSIADLITAFANVLPQLIWEITERFYGGNVLCKGIKYLQILGPYLSSFTLCATAIDRYRAICFPLESRSALNRSKLKVSIAWGLALICCLPQLFIFSYRQIPNSPGVYECWGTFIQPYGERLYVTWYALTSFFIPFVILIFTFSNICLELWRNGRRIKKANLTTSTRRTSSNNDQCTPRSHSTAYFSKAKIKTVKLTVTIIICYICCSSPFNVVQIWAYWAPGAQERPLITIAMLLPSLNSCVNPWIYLF
Zn-Sulfakinin-R	Zn_GPCRA22	IPLYVVIFVLSIVGNSLVLVTLAQNKRMRTVTNVYLLNLAVADLLLGVFCMPFTLVGQVLRNFVFGAAMCKLISFFQAVSVSVGVWTLVAISLERYFAICRPLKSRRWQTQFHAYKMIVMVWLASLIWNSPILVVSRLQAIKVTGRHKCREEWPSKSSERAYNIFLDAMLLLVPLIIMSLAYSLIVSKLWKGLRREIRHNSSCRRQLERTSSSATVNEVVMTGNINGGSTTGNAVITPLRHHRLFSANPSQQPILPRQATAATAVCSGTDGNHRTATSVKLWLFKGMVQARLPSSNDVASGRYRDRPGSLSTGKTVAIPSQQTTTSAGPYNAPPETSRLIGSSARNGTTCREEKDPRGHGSAVDGDDVIAPPGESPNTYTFTRHAIRSNYMDKSIEAKK…
Zn-Lutropin-choriogonadotropin-R	KDR23756.1	WVVFLLAMLGNGTVVFVLIFSRSKMDVPRFLVCNLAAADFFMGVYLGFLAVVDASTLGEFRMYAIPWQMSVGCQLAGFLGVLSSELSVYTLAVITLERNYAITHAMHLNKRLSLKHAGYIMACGWSFAVVMALLPLFGISDYRKFAICLPFETTTGPASLVYVVFLMFINGVAFLILMGCYLKMYCAIRGSQAWNSNDSRIAKRMALLVFTDFICWSPIAFFSLTAAFGLQLISLEQAKVFTVFILPLNSCCNPFLYAIL
Nl-GPCR-A3	Nl_A3	HGYVSLIVCAFGTIANLLNVIVLTRKELCSVPINRILTGIAIADMLVMLEYVPFACYMYLRPSILSEFTYTGAVFILFHTHFSQVLHTISICLTLTLAIWRYVAIRYPQQSHILCSEQRCQQALSAAFLLPLLICAPSYLNFSIRSTKVLEKSGVVVLYHIDLSQVAKEDDGLLYIVNLWVYAVLIKIFPCLLLTVISYWLINVLYRVNRKKQELKSNTFNMTGAGAEASGGKPKLDRAGKRIDRGARMLVGVFLLFLITDFPQGILGLLSGILGRCFFKNCYHLFGEIMDILALLNGAINFILYC
Nl-GPCR-A19	Nl_A19	YYIPAIISVGLVGNLLSCVVFLRTHLKMRSSSYYLAALATADFGFNVTLLLVWLSGFGLRVFNEEGWCQGVVYFSSVCSFLSVWLIVAFTVERFIAVQYPLHRPHMCTVERAKAVVSLLAALALLLHCYSFFTASVRLSPEGGDQICEMNERYREAMRVINIVDTVLTLIVPLALIVVMNTMITRNLLRFGKRLQQQNNQSNPPPTQQLQSDFNLNQINSSSSTNKICRGPSQQSFHSSNRAATSSSSHVQMQAQTVVTTRLTNATTQETPPQATRCIHIRSSRTNLVSTKTQQSITKMLLLISTVFVMLNLPSYVIRLYVFVCFSLWRQEASNSLWCMQQFFMLLYYTNFSINFLLYSMCGITF
Nl-GPCR-A42	Nl_A42	VAVYSLTFVLGIVGNSLIVFTIFRYRRMKSTTNVFLASLASADLLLIIICIPLKIAKLFSYTWTMGVFLCKMVHYMQNVSAICSVLTLTAMSIERYYAIVHPMKAKYICTISQARKIIIGTWLASLLLGAPIMFIQDHIEVGAKIKGYWCVRDYVNNREWVTAYELYMLILILIIPTSIMGITYSSICWEIWRVMKQRKTMTSGKATLTTETFPLSSKRSTCSIKTTAKSCIRTTDEENGTVRQVIKMLVMIVIVFVICWGPLLVDNVLTAFGVLPDQKSGTLKHMYTGFTLMAYFNSCVNPIVYGFMS
Nl-GPCR-A43	Nl_A43	LLIIFMLSVVANLSIAGAVLRYKEMRTVTNCFLLNLAVADLLFAAGTPLVALARLTPVWQFGSVTCRLLPYSQFVCGFVLLWTLTLISMDRHRCLAIPPYRSELTPRRALLLTAATWLIAAILFLPVAAWFRYYPDTRVCTLVFPPNDHVNLSLFFVVPVTCLSCLLPMSLLAFHYQRIFHKLVKTRSRWMVGGQCAEPREQRKISIQQIVNGGAGVRAGSLTHHEESRLNKHIRVARIILLNVLVVLIMWLPITVVMFLIYVDGSRPTADTNFFLRSHHFLWALLIALLNTVVNPLLYGFL
Nl-GPCR-A44	Nl_A44	ALVILFSVTATLSLSGNVTVIIVLSLGKRSSSDLKAFLINLAVSDVTMAAFSIPFTYTMFLLGRWIFPPWFCPIVMTMQHVSVIVSVYTLMAIGIDRYKAVMYPLNLRARKCRNKLIIAAIWIMAGSVSAIQLYVSEAKPFKYDRQWHYECSEQWTSEDHSKIYTVFIFSFTFGIPLIGLAYTYTSIAWRMWKRSSPGNADPDRDMVQLKSKKKVIKMLFTIVILFTLFWLPLQTFVVLFYFVPDFGNLLTEQQRRIYALSYFGCLWLANANSFVNPLVYCFMS
Nl-GPCR-A45	Nl_A45	GTLFQSIIFTSGCLGNIMVITIVSRCRTMRTPTNCYLTSLAVADIMVLVASVPLNIASYYVVSEQWLLPDFTCCLVIYLQYLGINCSTLSLVAFTVERYIAICHPMKAHKMCTLHRAKRIILFTWVIAIFYCTPWFTTVGTRSIDYRHFTIKKCDFLYNRDVYFRFYFTDLIVFYIFPLLLTCVLYGLIMRTLMRRSGGIGRSATVRKNSVKAEIQSRMQVVKMLALVVALFAILWLPYRGLLVYNSLASMFGGALYMQPWFLMFAKTCIFINSAINPILYNA
Nl-GPCR-A47	Nl_A47	CVWVLAIVATLGNVLVIMWRSRYKHCNQVHSFLITNLAVGDLLMGSYLLLIALVDWHYRGVYFIHDSDWRSSQLCAFAGCISTFSSELSVFTLTVITLDRFLGIIFPFRVRRLEMARTRQLMAFGWLLAGILSALPLSRFTYFHNFYGRSGVCLALHITPDKPSGWEYSVLVFLVLNLLSFGFIAVGYLWMFLVARTTQKAVTKERQMNEAAMAWRMTMLVATDAACWVPIILLGIVSLAGYTVPPQVFAWVAVFVLPLNAAINPVLYTL
Nl-GPCR-A12	Nl_A12	VALYALLVLGGASANIALVFSVFRDRLYKDQTCVYLVNLALADLVKCLFVLPISLTVLLVQNWVFGSFLCYFLPMIQDIPSHVTMQTFVLIALDRHRFLQEPAKPRVPAFVCATGTWLMAICIVLPYPIYTTYIDMERYHPMFAGVGICMVNLADDMQEYVRGLFIAMYVLPLAVNAYLYVKMSRELEDQDGPLAFTLYEARTQRNNHTPYHYREGESQFRFRSPTVNFDLYEAELDMRREKRTQKYLIAMVTVFAICLCPLTVLRIAKLALNETYENSGHFDITFTLFVWIAFLPTITTPVLYASW
Nl-GPCR-A17	Nl_A17	YALVLAVGLLGNALIACALLRQRATRNLLLLNLCASDLLVCGLSGPVSVVIALRPRVSMALVACKAVFFLQGVPVAASTLSLMMLSVDRYASIEHPHLLSQMRQSRRLPVLMNMFVWLVALLASCPILYSRTTTLPGAVCEEVWPTYSLRVSFTLCQVAVVYVVPGLTVAACHHVVGHKLYAVSLVAAAANGDIPLPMPILGRQKEVIIVASLQPDLPSKTMQRHNKEGDGDEADDRRKRSTSRHKSLKSSESGRSKPPLTKQMSRQSLNSRRRLANMLVALVVVFATCWLPYVVLKIYSVDPSADDALIQSLLPFCLLLGHTHSAINPIVYWFLN
Nl-GPCR-A18	Nl_A18	YVPVLVTLGTAGNLLSVLVFFCTKLRKLSSSYYLAALAASDTGFLATLFVAWLPIVNVPLFNKPVICQASIYLNSVCSFVSVWLVVTFTVERFIVVLYPLQRQAVCTVTRAKAVLAILAIVALLTYSPYLITSAPQLKADPLTNTTHEVCTLLDGYHDLASLLNSVDVMLTLVLPFVLIVALNSLICRTVWRLARIRRGMMLPPSEQQPAAGGGNCTGGSRLHRSRKLQSSGGSSCAVAMSAARQPRKRSPSSSAKVTEMLLVVSTVFIVLNLPSYVVRIWIYASPPSHNEHNNWQIILQHYFLVLFNTNFGINFVLYCV
Pc-GPCR-A54	Procambarus-GPCRA54	LAVLLVIGTVTSVLFNSYILFVSCTHSFTQTRTTTHVLLLHLGVINLLIAALFLVGLFPSLLQVEWVGREGCSAVGSAWFTLHVAAIWTLTALNLDKYVAIASPLHYARFVSPGRVGVTVLVSWVLSAGLCTLPLLLPGLHSSPRPPGCCLPDVVSAAPLLGRSYALALSLLGYLLPAVMVASANGRILVIARHHRHRIVSALWDVTVSAQATVTPQRSHFYLTRYRGRSAATTVFHFVGTFIIMYIPSAVCLLYEAMARSYVPVNVSTTNFALLTFAPAINGFVYGV
Pc-GPCR-A31	Procambarus-GPCRA31	SVWVMGVLACAGNLLVLIGRLVVKETNKVHSFYIKNLSLSDLLMGVYLFIIASYDAFFRGSYIRHEYSWRRSWQCNLCGFLSTLSSEASVFTLTTITLDRYFSIVHPLTLKERTLPIAVGVMVATWSLAALLAILPLLGIHYYGDNFYGSNGMCLPLHIHDPYAKAWEHSAIIFIGFNLVAFMFIAYAYGRMILAIRESQMSLRSTQEKQDRILVKRFAFIVGTDFLCWMPVIIIKVIALGGVVIDRTLYAWLAVFVLPVNSALNPILYTL
Pc-GPCR-A32	Procambarus-GPCRA32	TVWLVAAATLVGNLTVLGGRGLSRDDNKVLSLFIRNLAVADLLTGFYLVVVAVKDLQFRSEYHVHAYYWMTSWECTITGVLAMTSAEVSVLILAFMSVERWVCITWPLAAPKLSHEGAKLALACIWALGIVISIIPVMYYRGQQGFYGTNGLCFPLHLDDPWVPGWLYSALVFVGLNQIXXIRRTRANTPLSLGDREFAMRFFFIVFTDCLCWTPIIILRIMALADIDITPKLYAYVVVVLLPINSALNPFLYTF
Pc-GPCR-A67	Procambarus-GPCRA67	VAPIIVLVGMVGNLLTIMILRLPQFRGVTYTYFLALAVSDFLALGFSISILYHIIMGGTPHYSEAVWFSYYELLFTNIPMSTSVLIVVCVTVDRFFSVCRPTDFKRIHTSRNARAGILISVLTSVVVWLPTCLLMDPKLYDKCETFFFEPPDNRTWWVACISSQTLNSPYYIAYRWLRQIIVTFIPIIILLVLNTLILKEFTRLRKTKHEMSRGQPFAQDGCVPESRSRDDQHLISLLKAVMISFFVTLVPSGICNAIYTEVLATRMTFEVFRAVSNDLEILNHALNFYMYI
Pc-GPCR-A68	Procambarus-GPCRA68	VFPVLVSLGVVANLLNLVVLSRPSMRGVAYRYLNHLAVSDLLYLLFNVPFCMNDFARISEMQVVSAASAVYYANVGIPLVNLFLTMSEYIVVWLSYDRCLAVCSPQKFSAKQRMEVVRIRCGMSLLLTMFVYSLSPLRQTYNCDDDGCCVSESFYSEEPWYMGYEFFREIYSRFLPAVLITSFNVAIVVTLKQIKRERDCDIINEARQERERRLFFLLMAITVFFYVSAFPSAIYKVIMFNDMTFVPYFRAVADVLEVSGHVFNFVLYF
Pc-GPCR-A47	Procambarus-GPCRA47	VVVLGMVLTAALVLAFVSSAFIFFIILTSKQYKNSTSLLHLQLMVASALLSLLFIVFSTPSFIQGRWLLHEDLRLREVPSTPTSPYMKDPWDLYNATNNFTVRPLPPQPAFSWVTLQDLTNSTHSINVTALLNDTAAASRDPDIWESDALCRLYGFLLIVLHTVAVWVVVGLHCDKYCAISTPLRYNQIVTRHRVAAFSCLAWLLSVALASPPLVTTYSYTFSQGVCLPVWHRASATTYTWTLATFCIILPFTIILIVNSRIIMIARHHQHRIFSAIFEVMMSAQATVTHQKNPFDIPKKKRKSVWTVLEQIVAFVFCYYPFFGTVIWESLHGRRANQYWVLLGTTLLLISPLVNSFIYGI
Pc-GPCR-A55	Procambarus-GPCRA55	EKTYTVVLFVLTFALPVVGLGYTYLSIVAMMCSYRIPGNAEPSRDQQHLQAKVKVINMMIAVMVCFVLSWFPLQVLQFLIYFAPEITHCRGHECFPYYMSFFACHWIAMANSFMNPFIYCFMSNNFRVSLXXEDLCQFIRKCGRKRIRRQNSKTWSRSELGSSFRSILYITHKTSVQSSTKTSFRAKTDKQRDGEALELRTVPDRQSPLRTSRXXXPPQPQPPPTTPQQLPPHQPSQLLHRAPRPPVQVP
Pc-GPCR-A69	Procambarus-GPCRA69	GVTYVVGVVGNGLIIFTICHYRRLKTTTNVFLASLASADLLLILICIPVKLAKLFSYSWTLGEVMCKMLHYLQALSAICSVLTLTIMSLERYYAIVYPMRAQYRCTISQARRFCLAIWLLSVLLACPVFLLQVHMEVGERVRAYWCVRDFDSPLLWRSYETYMLVLVLLVPACVMAAAYAAISNAIIFMVVQRRTITGKGQMANGVLLLNGSTRGRRRATEESEVRQVVSMLVVVVVLFVVCWGPILVVNVLKAYAIIPAYSVPLKHVVTAA
Pc-GPCR-A49	Procambarus-GPCRA49	IMPAFISVSVLTNLMNVVMLGRARRQHQQRQAQATTFFYLMWLALTEMLASLALVPALAHLDRSHLSYGWAFYYAHFETPVLNALTSASVYIVVGLSVDRYIAVCHPRRYQDVSAPRLAVSRITLSLLVPALLYIPHGFYQKVVAAQGGAGWTYEGLEMAAPRAWYAWNVVVELCHRMAPATLLAALNACIIYTFKKVTSRRRLLTKSKGTESTNKSEDNSKGQQEHRLIYLLMAIVTTFLLTNLPATVLALIDTAGASHGSFSLEVFRAVANCL
Pc-GPCR-A20	Procambarus-GPCRA20	VAYGVVLPVLVSLGVLGDVLNLVVLTRPNMTGVAYVYMRGYAAASLFALLCAIPFTYRILTQETDRWNSYYIAAFHAHVVLYFGNSCIGIGVVMLLALTVERFISVCYPAKARNLCGETRAHLTVAIIPVATFLLNSPYLFLAHVASCRSDAGTVVHLKKVNAWLVNSLWFQGYKWVMEVSFKFIPALILVYLNIRIIRTYKAVCKKRRLMTKKSGEQRRQYAEESRLMFMLGGTSTLFFVCMTPMIVLSVTIHQGWKNSMGFEVFRAIANVLEVTNFAVTFYIYC
Pc-GPCR-A44	Procambarus-GPCRA44	ILLYSLLVVIGSVSNAAMITHILRRRLYRDPTNAYMMNVGVCNFIMSVLLLPLSLAILLIQNWIFGSFLCYFVPMLQDVPIHATMVTMVFVSMDRYRTIVTPNKARLPPFIAVLAVWVVSVCVVLPYAVYMHYIDLQEVFGDQFEGAGICTVNLGDDIAEYIRGLFVVLYALPLALVTFLHVRVGGELRSREAPVTLAMLDSTSRGSQQDVWSLQENSRPSSSAILTEAEGRDGFLYHDAHHLPSFLTPTPLGAGGGGSSGGSHTPTLLGGRTPSLHHLEEAEAEVEREKRNQRYIASIVTAFALCMCPLMILRLVKNMVMETYDNSGHFDITYITFVWVAFLPTVTTPALYAAW
Pc-GPCR-A04	Procambarus-GPCRA04	TVYVITLLLGILGNSLIIYTISRYNGMKSTTNVFLASLASADLLLILVCVPVKTAKVFAYSWTLGWFLCKAIHYLQNVSAICSVLTLTAMSMERYYAILFPFRAKYILTVHQAQRMTGLVWVLSVLLSTPILFIQVHSRVGVRVESFWCHRNWENAALWRAYETYMLVVVLAVPTLIMGFAYTAIGCKLTKVMIERSSLVGAGSHVSALETHPLNSIRVTSRSRDDDRDVRQIVTMLLVVVVLFIMCWAPMLVTNVLRAWGVLPTYDPRPFYKHLYNAVHLLAYFNSCINPIVYGFL
Pc-GPCR-A16	Procambarus-GPCRA16	VIFRNDSAGALAAFGTPVVLGERGADGLASSRGKINLTLLKLDLDLSPVFPSLEAVSGDVQVFLIFVYSLAAVLSLVGNVTVILVLAFGRRSSVRCYLINLAVSDITMATFCIPFSYTSFMFHRWVFAPEFCRIAAFMQHMSVTCSVYTLVAIGVDRYKALIHPLNTRWTKSRARLVIAGIWVFSVLISLVPLVVSDSERFDWDGEWYYEC
Pc-GPCR-A33	Procambarus-GPCRA33	CIWILGFIALLGNSFVIIWRSVYSSGNKMHSFLIVNLGVGDFLMGVYLVIVAAVDLQYRGVYAAYELSWRTSSLCQLAGFISTFSSELSVFTLTVITVDRLIVIKFPFGVRRKEGSVTRMVMAGVWVLVGLLAALPLTRLQYFHNFYGRSGVCLALHITNEKPSGWEYAVFIFLVLNLLSFGVIAVSYVLMYVAARDTHSAARADTNVRGGDGGMAKRMSLIVATDAACWLPIIFLGIASLCGVTIPPRVFSWIAVFVLPLNAAINPVLYTL
Pc-GPCR-A35	Procambarus-GPCRA35	CIWILGFVALLGNSFVIIWRSVYSSGNKMHSFLIVNLGVGDLLMGVYLLIVAAVDLQYRGVYAAYELSWRTSSLCQLAGFISTFSSELSVFTLTVITVDRLIVIKFPFGVRRKEGSVIRMVMAGVWLVVGLLAALPLTRLQYFSNFYGRSGVCLALHITNEKPSGWEYAVVVFLVVNLVSFGVMAVSYVLMYVAARDTHSAARTDTDARNGHGAMAKRMSLIVATDAACWLPIIFLGIASLCGVTIPP
Pc-GPCR-A34	Procambarus-GPCRA34	CVWVLGFIALLGNSFVIVWRLLYENDNKVHSFLITNLALGDLCMGLYLLIIAAVDINYRGVYFIYDAFWRTSSLCQLAGFFSTFSSELSVFTLTVITLERLVVIVFPFRLPRLSMRWTKVIMGLVWAAVAFLAALPLANIQYFVLNLASFSVIAGSYWGMYKAARSSSAAVRSDLQRRESSMARKMTLIVVTDAACWLPIILLGVVSLAGATIPPQVFAWVAVFVLPLNAAINPLLYTV
Pc-GPCR-A53	Procambarus-GPCRA53	YVIVFLVSLVGNLLVILVVYYNNHMRTTTNQYLVNLALADLLVTVICMWVHIVRHLSYPHYVLPALVCKLDGFVQATSLLASVLTLTVISVGRFVAVMFPLHARTSPDRARRVIAAVWISSALLSCPTLFYRQLFSVKWKNFTTYQCEEFWPTDGHFDPLLSKCVITYDPKKHFYIFLTIAVYFLPVGIMFINYSLVVWRLWMTKLPGEQSLPARNTATRAKRKVVKMVSVVLLVFVLCWTPLQTIILYISFVHEQSSLPEWFSVLEFSAYFVAYSNSALNPIIYCGF
Pc-GPCR-A52	Procambarus-GPCRA52	VLVMMASVPSLAIISFDRMVGVVSPFHQHLKRRHAVAIIASVWLLAGLLALPFGFYRVYSERVWKDLTERICGEEDDKIRIWWKVSILGLNWFPLGVMVISYTTIFFYFKQVKFKGTISRREHPAMVHLKQRVVRMMFAMVLVFTICWLPFQILKLAQRSFIDDTGHYVSTSAEKTYKTLLTVSQYMIYCNPALNPIVYALMHQTFRRAFRVTFPCFYNRKSSLVLTPGVGIQRYVWSVKSTVSDVYGKDVVTTPPRNLRDRICGRNQLTPSAVLSTSALAASIAL
Pc-GPCR-A63	Procambarus-GPCRA63	SLTIIIVIWIVSALIAVPWPVYRVYTVHIWKDLTETICGEKDKINIWWIVGVIVLTWLPLGIMVVCYSTILIYFRHKNFRISSQNEHPVITHVKKRVVKMMFVLVVSFACCWLPMQILKISTKSFLDPNGQYKDEATEKSYKILLTVAQYMVYINPALNPIVYALMHQTFRRAFRVTFPCFYNRKSSLVLTPGDGMRRYMWSYRSGTTSYAGGNDTSSVIRQRAGTEGRPTPTALLSTSTLAAAIALDSTV
Tu-moody-like-R-putative	XP_015795608.1	IVTFSIALLIGIIGSIGNFLVILCLTKYSASLIKQPTTKLVINLSTSDLIFCLFNVPLTATPFLTRNWPFGQLICHLYPYFYYGNIAVSLLSITFIAINRLVIIIINAQSNSFYSNRNLCIMVIITWVLPFAILCLPLTHTWGYFGYQASLLTCTIMGSEALKDFLFLISFVIPCLTIIICYGIIWFKVRSHTRNLADKGINRSQREMRLTKLMFTIFAVFVICYAPSVILQITSAPVRHPYVYILSLWLVLFSASVNPLIYFIM
Tu-NPY-type-2-R-putative	XP_015781918.1	LIFLIIIAISFIGNYLILIVMIKFKNSRNCTNLFICNMAIADLMTTLFSAWTSLQENLFQNYTLGPVFCKIETSSKVLFLITSIFSLTWISCDRLIGIIRPFRNPMKRRKAWFIMGFIWFLSFIIGIPFYFWREYRTREWCDYFEVWCKTDGRKIDVYMFVLLAFMVYIPLFIMTFSYCLVIAKMKSFETKISTDENSIKIKHRRKVILMLFIYLITSAICWSPLQVVVFYRFIALNSSVDSVKPWNEEAKFWAQVFASANSALNPLIYGIT
Tu-NPY-type-6-R-putative	XP_015793027.1	TLLYMVLFILGLVGNICIIYWHVAPKSSYYQRTTSNILVINLCLSDLLVTFFCCPFVAYAKNTTIWRFGEIPCTLVHYMQGVAITSTTLSMTSLSFARYTLMQRSDLVSMRKFAPLNSIFLCITWLSSTLLPIPLLFVRKLKLVHLLDYSFSFCLELWPSDVHRKLFSVITFIIVYLIPCSILVYCHTRVSLALVSSNRELTNRRGTMNGDIRGSSRKRAFRVKSSTISSDSSTIDNLEILINPEMKEKKKMAMNRRHLSRFLMSITVCFVFCWLPYNILSFYFDLTESQYALDMLPFTLFLGHSHSAINPLVYWTL
Tu-cholecystokinin-R-putative	XP_015793818.1	ALVYGITLITGLIGNGLIIYTVSHFRRMRTLSNVFLASLASADLLLIIVCVPVKNFLFLFVKFGQLFSFSWEIGPIPCKFVHYMQNVSAICSVYTLTAMSIERYYAILHPVKSRYMCTMSHTRMIIVLTWIFSLISASPIIHLQVHIEVGERYKAFWCYKDPSQPIIWKLYECYMLTLILVIPCIVMGFTYSCICKKLWIVVQKRATMFGHDNGNIELKNSKPMSDDRKMLRSENSFSTKQHSMKNSSIQEMYSNKADDDTAVVKQVIKMLVAVVILFILCWSPILIINVLTAFGKLHQLNYGFLKPLRTAAHLLSYLNSCINPLVYGFM
Tu-Galanin-R-putative	XP_015793722.1	LLFLIIITISCIGNYFIVIVIIKFKNSRNCTNIFICSMAIADLLTTLMFAWTSCIENLFQNYVLGPFFCKTESSAKVFFLIASVFSLTWISCDRLIGIIKPFRTPMGKKRALAVLSFIWVIAFLIASPIYFWREYRTRQWCDYLEIYCKVDSDKVDVYMFILLAFLVYIPLFLMTFSYCLVIAKMKRYETRISTEENIVKIKHRRKIILMFFIYLITSAICWSPLQVIVFYRFVAFKSVDSVKPWSEEAKFWAQVFASTNSAINPLIYGIT
Ls-GRL101-R	P46023.1	VSIWVLGVIALVGNFVVIFWRVRDFRGGKVHSFLITNLAIGDFLMGVYLLIIATADTYYRGVYISHDENWKQSGLCQFAGFVSTFSSELSVLTLSTITLDRLICILFPLRRTRLGLRQAIIVMSCIWVLVFLLAVLPLLGFSYFENFYGRSGVCLALHVTPDRRPGWEYSVGVFILLNLLSFVLIASSYLWMFSVAKKTRSAVRTAESKNDNAMARRMTLIVMTDFCCWVPIIVLGFVSLAGARADDQVYAWIAVFVLPLNSATNPVIYTLSTAPFL
Sp-ASTA-R	Bao et al,2018	IVVPIIFGIIVLVGLFGNTLVVIVIINYLIFSLAMADLLFIVFCVPFTAYLTYVTAYASVYTLLLLSLDRFALYAICCSWILILTSCIPLYLMAFHIGFITTMYFVPLAVIVVLYLMILMVVIVVVTFIVCWFPIQLVLLLIIMQIAAQVLAYINSCVNPILYAF
Sp-ASTB-R	Bao et al,2018	LYGYAMPVLLLVTTVANTLIVAVLNAVLMAMALSDMLTVLFPEPTFMFHTASIWLTVLLATQRYISNIVTWAIVWVFFFAAIHQTPIYFWFRVVFVHLGPCTVLVVLNVLLFLMLIVVVSVFLVTEIPLAVITVLHIMVMRFFIISNSFIIFSYPINFAIYC
Sp-Myosuppressin-R-1	Bao et al,2018	VHGYLALMICLLGAFTNVLNMVILILTGLAVADFLLLLEYSFYAASHYTQVTHTVAICLTITLAVWRYLAVFIAYVISPILSVPNYLVYINFWFHSVLIKIIPCLLLTVLIYHIIRMLLTVLLLFLATEMPQGVLALLWGEVMDLLALINSAVNFLLYY
Sp-Myosuppressin-R-2	Bao et al,2018	MSLVVCVFGSVANVINMVVLAILTGLAVTDLLVMVEYIPYTMVFHTISIGLTVTLAVWRYIAIA
Sp-ASTC-R	Bao et al,2018	LFYALTCLVGLCGNTLVIYVVLYILNLAIADELFVIGIPFLMLYMITTSLNQFTSSLFLTIMSADRYLVSLTAWTLSALMIVPVFMYSAFIRYSFALAFGIPLCLIFIFYSLVLVLTVITVYVLCWLPYWVLQLTLILLVLYMISSCLSYINSALNPILYAF
Sp-NPF-R-1	Bao et al,2018	VFIINLAISDLLLCLVTMPLTLV
Sp-NPF-R-2	Bao et al,2018	AAFASLLTAYGLLIVLGAAGNSLVVVFIINLAISDLLLCLVTMPLTLLVGTLQATSIFVSTISITAIAL
Sp-sNPF-R	Bao et al,2018	FYIEYLTIFMLGVFGNCLVCYVVFYFITNLALADILLCVLAVPFTPFVTMAQGTSVYVSTLTLMSIAIDRFVCYMIIISIWLFSISATLPYAFYMVFSGFTAIMQFVVPFIIILICYGMLIAMVTIFGVSWLPMNVVHLVLCFFITHVVAMSSTCYNPFLYAWL
Sp-Ryamide-R-1	Bao et al,2018	VYVLYITILIVAVLGNSVVVYIVCYFIANLAIGDLCMAIFCVPFSFIYLQAVSVFVSAYTLVAISLDRYIIIASVWVLSLATTLPVAVYSVAYSVALMLLQYFLPLTVLVFTYMTKMMVTVVMVYTLCWLPFNVLMVVALFHWLAMSHTCYNPIILCWM
Sp-Ryamide-R-2	Bao et al,2018	FIANLAVGDLLIMVFCVPFSVASIILCVFVNYSQAVSIFVSAYTLVAISLVIIAAVWFMALVTTLPIA
Sp-GPCR-A11	Bao et al,2018	LITVYALLMTGGILGNLILAAVIVYIINLTVSDVSLCVVCMPFTLLVPMLQCTNILVSTATIVAIAADRYFVAAIWLVSLAFTLPLFAYYYVIALIIMQYVIPILVLSIVHGRIHTMLLTSVAATFAVCWLPWHVVNLLAFYVVFGSCHAIAMSSACTNPVLYGW
Sp-Ryamide-R-3	Bao et al,2018	LTLAVVLVYSLCWLPFNILMVILVWFICHWLAMSHACYNPLILCWM
Sp-GPCR-A13	Bao et al,2018	VLITLGLFFLVLVVGVVGNVLVPVVYFLMNLSAADLLVLLFCLLHSPPQIWVMGYGMCILA
Sp-GPCR-A14	Bao et al,2018	WVVYRNVLPVLVFAGIILNVLCLVVLVWYFLALASSDLLVCVFHIPVITTMIGVCQSFGTYVIVWLSLDRFINRLLATAMACITFHLVYMVLAYGLFIRWFPGCLLIFFNASLVVGIVKLVIITIAITASYILFTFPIMIYIVLRAVGNTLQLLEHVIHIAFLVGL
Sp-GPCR-A15	Bao et al,2018	VITYYGVLPVLVVLGVTGSVASIWVLLYFLVLAAYDMALSVFYIPIVVFAHFGWTTACTFHALGTYVIVFLSLDGFLHRMVAMVVVCVGVHLPFMYNLMVRWLPYGLLAVFNFSLVMAVVLVATVIAMTASYVVLTLPITIFLTAFATLRHVGNIFQLLEHVLHAVFLVLI
Sp-Myosuppressin-R-3	Bao et al,2018	FWIYSVILKLLPCAALTGLSVAIILLVILVLFLASEVPQGILSLLTVILLGETMDMLVLLNSAINFLL
Sp-FMRFamide-R	Bao et al,2018	FVVYGVLLTSVGLLGLAGNFISITIINCCLIGLTSFDMIVTTTSILMFGLPIIFPLALIAQTGSVYLTVTVTLERYIYVMSVAFLSILYNLPRFWEVYIMWLYLFVMYLVPFLCLMIFNFFIYIGLAVMLLVVVSVFFLCNVLAFIIELTMTSNLLVTINSSVNFIIYC
Sp-Proctolin-R-1	Bao et al,2018	LVLVPLVLVVGVLGNSVTIIVLNFYLTALAISDLLYLVFIFSLLWLADASSSTSIWLTVTFTIERYVIVAVFVLCFTLTATTPHEWVIWFTAVMFILLPLVLLAVFNSFLIHIVVMLIAVVLLALLCQLPVAVLLLYIFNLLTAINAACNFVLYCAMS
Sp-Proctolin-R-2	Bao et al,2018	QEHKITVMLIAVVILALVCVLLLYSTVCEPLPRTKEFALLNAINAAANFILYCSFSDKYRLAHSFVASVNDTTVGNTRIGVSKASSTPSPMPPRDAPNRTARGTRVTLQYGFGRPSHLLSPPHAHHNSSHTLDLDNAHY
Sp-Proctolin-R-3	Bao et al,2018	AAEGHNASLQHFPALREFASFASNASLLATSSNYAPYERFVLVPLVMCVGVVGNSVSMVVYLTALAISDLLYLVFVFSLSLALWLTDASSSTSIWLTVTFTIERYIVVAVVYFLCFALTATTPHEWVVTYRHTYYWFTAVTFILLPLCL
Sp-GPCR-A21	Bao et al,2018	VFYYVFPALVVTGIFTNTLNLIVLWLRALACVDLSLCVLTVPVYAHFGWSLSIASQILSFYLMGMFAFERAVFRGGVVSATVFVLLLYVPTMYAWLREIFSRLVPAILITFCSVRITLLVLLLFWVTTLFYIFNTPVTVYYLGFLLTFAAISNLLQMLGNISNFVLYFII
Sp-GPCR-A22	Bao et al,2018	YLIPTLVSINIFTNLLNVVILSSLGYLLWLAITDVVVSLFLVVALILNALTSGSAYIMVGLSVDRFLANIRIGLSLLVPVLLYIPHGFVELFHRLIPASLLLFLNLRIICTLVYMLVAIVTTFLLSNLPAAVLALIVFRAVANSLEAFGSSLNFVLYF
Sp-GPCR-A23	Bao et al,2018	ICVRFAPAVLLGVLNTWIIILLLSRGMSCEVSAIPSQSYVVQPSHTVPYSDSYTLEKEDVVSGKCTPEGASTPVVNGYRPVLVLSAINVSAAPAPVPPPRHGMSVLLLVSIIVAFFITNIPAAILSLTFIFRAIANNLEFLNFGLNFILYFL
Sp-GPCR-A24	Bao et al,2018	TNVSRDEGEGGVPGSMEVVEGVVDGVVEKDLSPEIQYVIISFGILTNVLNLVVLSRMWLAVANLLVCVVLLPFTLYFAHIEVPVGNALIASSVYIVVGLTYRNLHSHYVASVRIAFSFIFIIYIPMAFYKMVVPSGMSP
Sp-GPCR-A25	Bao et al,2018	WVVYQVVFPALVGVGVMANLLNLVVLYLNHLAVSDLLYLLFNVPFYVGVPLVNLFLTMSEYIVVWLSYDRVVRERCGLSLALTMAVYCLSPLSYSRFLPALLVTGFNVAIVVTLLFVLLVAVTVLFYVTAFPSAMYVLRPIADMLEVSGHVFNFVLYF
Sp-GPCR-A27	Bao et al,2018	LYIFLYSLLVVCGTVGNAAMIAHILLMNIAVCQFIMSFPLLPLSLAILLV
Sp-GPCR-A28	Bao et al,2018	IHVLESFPNETVDIGKPHLLFLVLYGVVMVAGAVGNVAMALTSAYLLNVALCNVLMVAVLLFGSFLCYFIPMLQDVPLHVTMVVSPHKPPLPPFPAVLATWVLGVCIVLLQVLLGPQFAGVGICTVNLEVTEYIHCLFIILFVLPLGVVA
Sp-CCHamide-R-1	Bao et al,2018	VSVGVTVFTLTALSADRYRAISVTLRVTAAIWVVSLLLATPADLGDMNMTVCYPFPDTYGWVYYVLPLIVIAAFYLLMARHLLVLCFIVIFAVCFLPTHVFMLWFYFVMRILGFCLSFINSCINPIALYCIASHYRSSTLRPLETITLTTLL
Sp-CCHamide-R-2	Bao et al,2018	MVLAFVIIFAVCFLPLNVFTVIVGFCLSFINSCINPIALYCVSGTF
Sp-CCHamide-R-3	Bao et al,2018	LVPFLFAIIFIVGVIGNGALIMIFVLISLALGDLLVLFFTVPFVSTIYTI
Sp-GPCR-A33	Bao et al,2018	LIAYIITFLVSIVGNLLVILVVYLVNLAVADLLVTLVCKLVHLGFVQGTALVASVFTLTVISIGRAIWVIAAVWIAAALLSSPMLIYFYIIFTITCYFLPVTIMLVNYSLIVWVVRMVTVVLLVFVVCWTPLQTLILFTAYFVAQSNSALNPIIYCGF
Sp-GPCR-A35	Bao et al,2018	VATYLFVFLVSLVGNLLVMLVVCYYLVNLAAADLLVTLVCMWVHIVGFVQTTTLLASVLTLTVISVGRFVIAAVWIASALIACPILFYRTILIIALFFLPVAIMIINYSLVVWTLWVVKMVTVVLLVFVICWTPLLTLILFLEFAAYFIAYSNSALNPIIYCGF
Sp-ITP-R-1	Bao et al,2018	QHYVWSMRSTSNVYSDVMAMMRASSAVVGSAAVAASIVIETVLVMLVSLESLATISCDRMMGLAIIIIIWVSSAVLAVPWGLYWMALVGLAWLSLAIMLVSYFTILAYFRVVKMMFLVVVTFVVCWLPIQLLNIFALMTVSQYMIYVNPAVNPVIYGL
Sp-ITP-R-2	Bao et al,2018	ASLIMLVAVLGNLTIIIILAFILNMSVADLILALTGPIPFTV
Sp-GPCR-A38	Bao et al,2018	ALTFLLGVSGNSVIVFSMAWFLVSLAVADLLLLLLCVPL
Sp-GPCR-A40	Bao et al,2018	FAKDLSLGITVFTLTALSALTIVVAVVIWVVAAVLAL
Sp-Natalisin-R-2	Bao et al,2018	LAFGAMLLVAVGGNAIVMWIVIAFLVNLSAADLLMAIFNCIFNFIYMAVYCTISNFMANVTIAASVFTLM
Sp-Tachykinin-R	Bao et al,2018	LIWYVVFMGMVIVATGGNTIVIWIVLIFLVNLSVADAMVSTLNVVFNFISQFVSILSICASVFTLMAISFDRILIVVWIWVSSVCLSLPNLIYFTVVLMVLTYILPLTCMGFTYVRIGVKMMIVVVTIFAVCWLPYHMYFILAIYWLAMSNSMYNPMIYCWL
Sp-GPCR-A44	Bao et al,2018	VIIFLLGMIGNTLVIVTLL
Sp-GPCR-A45	Bao et al,2018	TNYYLVNLAVADLLTLFFAL
Sp-Pyrokinin-R	Bao et al,2018	YFLITVTGVLGNVATCIVIVYYLFSLAISDLLLLAFGMFTAEISTNASILTIAAFTV
Sp-ETH-R-1	Bao et al,2018	VGVWTGVLVTLMAVGVGGNVLVPVVVVFLLVNLAAADLLVLLVSLPTALVLVPFVEYCVSHASVLTILVISFERCTCILTIWAAAVLLSSPMLVMSLYINLVTAVFFFVPLVLLVLLYLVIMKARKQVVVMLATVTVFFFVSLFVLTLWIVWTPQETIETIG
Sp-EFLGamide-R	Bao et al,2018	CAIMIFLQHLGINASSLSLTAFTITLLVWVFATCYCSPWLYLTTVV
Sp-ACP-R	Bao et al,2018	FLSAFGFYMSSMVLVCISLIMLFFAWLISAVISLPQSVI
Sp-GPCR-A52	Bao et al,2018	LIAYSLLFPLAAVGNLLVFVALF
Sp-CCAP-R	Bao et al,2018	FAVMWILFISIVVGNVAVIIALLLFFIMHLALADLSVGLISVLTDIVWFAQVLVTYSSTYVLVALSIDRYDLVAGAWVLSAIFASPSLVFFMLVALTVFLFPTVIIAACYAVIVYTIWIKTVKMTLVIVFVFILCWSPYIVFIAVATFIQSLAPLNSAANPIIYCL
Sp-SIFamide-R	Bao et al,2018	ILYCVSYVLVSLMGVVGNSFVVAVVFIANLAVADLLVNIIVLPTTLIG
Sp-Trissin-R	Bao et al,2018	TNFFLTNLAVADLCVAVFCITASVIILVVVSGERYLAIV
Portunus trituberculatus GPCRs
Name	Unigene_ID	7TM sequence
Pt-GPCR-A1	TRINITY_DN18140_c0_g2_i5	VAALLLTVTLLGICFNCYILFLILLLHLGVIDLLLAAIFLFALFPVAGGAWATLHVAAVWTITALNLDKYVAAAVGVSWVLAASLCALPMALTLALLGYLLPALLVATANFRILVIATTVCHLVGTFLLLYLPPAACVLLVLANLVLLTLAPAINGFVYGI
Pt-GPCR-A2	TRINITY_DN20907_c0_g1_i3	IVVPIIFGIIVLVGLFGNTLVVIVIINYLIFSLAMADLLFIVFCVPFTAYLTYVTAYASVYTLLLLSLDRFALYAICCSWILILTSCIPLYLMAFHIGFITTMYFVPLAVIVVLYLMILMVVIVVVTFIVCWFPIQLVLLLIIMQIAAQVLAYINSCVNPILYAF
Pt-GPCR-A3	TRINITY_DN28405_c0_g1_i1	FSLYLSTFILVLIGVDRFTAVYSIIFVWVLSGILSIPQVLVFYQCVTYGLYSPAWLEKLYALLILLLTYISTFVTLHKSEISVVIVLAFVICWTPYYMMMIIFLFGIFFFGMSNSLVNPIIYGAFHLFTTYRSSGADLDTSVVNVF
Pt-GPCR-A4	TRINITY_DN16379_c0_g1_i1	FAVMWILFISIVVGNVAVIIALLLFFIMHLALADLSVGLISVLTDIVWFAQVLVTYSSTYVLVALSIDRYDLVAGAWVLSAIFASPSLVFFMLVALTVFLFPTVIIAACYAVIVYTIWIKTVKMTLVIVFVFILCWSPYIVFIAVATFIQSLAPLNSAANPIIYCL
Pt-GPCR-A5	TRINITY_DN15477_c0_g1_i1	FVPLNCSFLARLEEANNTEILSLFEGGAGRMSTTAMVVVGLCGNTLVIYVVTRFSKMLFVIGIPFLMTTSVLGHWPFLNQFTSSLFLTIMSADRYIAVISKLVSLTAWTLSALMIVPVFMYSIAFIRYSFALAFGIPLCLIFVFY
Pt-GPCR-A6	TRINITY_DN18084_c0_g1_i1	VGVWTGVLVTLMAVGVGGNVLVPVVVVFLLVNLAAADLLVLLVSLPTALVLVPFVEYCVSHASVLTILVISFERCTCILTIWAAAVLLSSPMLVMSLYINLVTAVFFFVPLVLLVLLYLVIVVVMLATVTVFFFVSLFPFRVLTLTRVLFFANSAVNPILYNLTS
Pt-GPCR-A7	TRINITY_DN16155_c0_g1_i1	FVVYGVLLTSVGLLGLAGNFISITIINCCLIGLTSFDMIVTTTSILMFGLPIVFPLALIAQTGSVYLTVTVTLERYIYVMSVAFLSILYNLPRFWEVYIMWLYLFVMYLVPFLCLMIFNFFIYIGLAVMLLVVVSVFFLCNVLAFIIELTMTSNLLVTINSSVNFIIYC
Pt-GPCR-A8	TRINITY_DN15440_c0_g1_i1	VLVPLVLVVGVVGNSVTIIVLNFYLTALAISDLLYLVFIFSLLWLTDASSSTSIWLTVTFTIERYVIVAVFVLCFTLTATTPHEWVIWFTAVMFILLPLVLLAVFNSFLIHIVIMLIAVVLLALLCQLPVAVLLLYIFNLLAAINAACNFVLYCAMS
Pt-GPCR-A9	TRINITY_DN14217_c0_g1_i1	IFHYVFPALVVTGILTNTLNLIVLWLRALACVDLSLCVLTVPVYAHFGWSLSIASQILSFYLMGMFALERAVFRGGVVSSAVFVLLLYLPTMYAWLREIFSRLVPAILITFCNVRITLLVLLLFWVTTLFYIFNTPVTVYYLGFLLIFAAVSNLLQMLGNVSNFVLYFLI
Pt-GPCR-A10	TRINITY_DN18262_c3_g3_i1	VLVPLVMCVGVVGNSVSMVVLNNYLTALAISDLLYLVFVFSLLWLTDASSSTSIWLTVTFTIERYVVAVVYFLCFALTATTPHEWVVYWFTAVTFILLPLCLLSVFNFFLIVMLIAVVILALVCQMPTAVLLLYSTVLFAVMRGLGNIFNLLNAINAAANFILY
Pt-GPCR-A11	TRINITY_DN15756_c0_g1_i2	VWIVFLLALMGNGVVVVVLVAAYFLVTNLALADFFMGVYLGFLAVVAGFLGVLSSELSVYTLAVITLERAAYIMAAGWVFALTMAVLPLAYVVFLMFINGVAFLILMGCYFKIYLLVFTDLVCWAPIAFFSLTSAFVFTVFILPLNSCCNPFLYALL
Pt-GPCR-A12	TRINITY_DN18915_c1_g1_i2	GHIIILFMGNLLTIIALPMAFVVNLAVVELLFCVLILPMSGAFVCVRYTLTQVELQTILAIALTRVIGVYIGAIWLYSFSARMPAAVYLVVDAFIPVMLIFILYFFVFIMVVMRVARTIFIIFLLVLVCSVPVAVVFLLVHILYWFQYCLNVVVYVLM
Pt-GPCR-A13	TRINITY_DN13881_c0_g1_i4	VATFIAVLFIGYLVLGLTGNFLTILALLFIISLCVADFLFCILVLPWEVLLRYWNVAVSLLSIAMITINRYIIALMIAFCWVFAFVMLLPTLLVLFGLGFCVPAIIIIICYSLIFYVIWRITKMVLIIFIAFLITYLPITLVVLGYVLIYVSSCINPVIYVIM
Pt-GPCR-A14	TRINITY_DN15756_c0_g1_i1	VWIVFLLALMGNGVVVVVLVAAYFLVTNLALADFFMGVYLGFLAVVAGFLGVLSSELSVYTLAVITLERAAYIMAAGWVFALTMAVLPLAYVVFLMFINGVAFLILMGCYFKIYLLVFTDLVCWAPIAFFSLTSAFVFTVFILPLNSCCNPFLYALL
Pt-GPCR-A15	TRINITY_DN30258_c0_g1_i1	VAYVQGVSVSASVNSLVAVSLMKLQITTYRARAIIVLIWIMAVIFIPDLPDLLVCVEMWPSREAECYLLPLVLISFCYFMIWIKVAVVKMLVVVVIIFMLSWLPLYVIFVILAIVTPMAQWLGSSNSCINPILYAFFLAIIKSRSCCGTLRFDSYSC
Pt-GPCR-A16	TRINITY_DN20076_c0_g2_i1	VAVWVVVVTAVVGNLAVMIVLIFLMVNLALADLCMGLYLLIIAAMFLTVFASELSIFTLTVITSERWYAMAVKIMVGGWTYSIAMATLPLVLAYLVSLLVVNGLAFFVITACYISMYLLVFTDFACWAPIAFFGLTAVAGLILLVFFYPLNSCANPYLYAIL
Pt-GPCR-A17	TRINITY_DN2042_c0_g1_i1	VIIFAVCFLPLNVFTVWWIVGFCLSFINSCINPIALYCVSGTF
Pt-GPCR-A18	TRINITY_DN18293_c1_g1_i1	LITVYALLMTGGILGNLILAAVIVYIINLTVSDVSLCVVCMPFTLLVPTLQCTNILVSTATIVAIAADRYFVAAIWLVSLAFTLPLFAYYYVIALIVMQYVIPILVLSIVHVRIHTMLLTSVAATFAVCWLPWHVVNLLAFYVVFGSCHAIAMSSACTNPVLYGW
Pt-GPCR-A19	TRINITY_DN16584_c0_g1_i1	VTLATLQVGVMVVGLLGNTTVAASVWHALLLSLAMADLLVTLLCLPAALALAATQNTAHAASTLSIAFLALDRLLAGLWVMAVLLAVPRGLTAALVAAVVHLLPCATVILCHAAVAMLVALGAVFAACWLPYVVALLIWAALEVTLVLGHAHSALNPVVYWL
Pt-GPCR-A20	TRINITY_DN3657_c0_g1_i1	IIIASVWVLSLATTLPVAVYVNFYALMDRQVCTEDWGPEEMLLQYFLPLTVLVFTYSRIAMVTVKMMAACVIAYTLAWLPLNLLPEGAHILLFFIVHSLAMSHTCYQFRHAYYRVLPCLHRLPFTLSEGLSSRQVTSKCEAQVCDV
Pt-GPCR-A21	TRINITY_DN15759_c0_g1_i1	FYIEYLTIFMLGVFGNCLVCYVVFYFITNLALADILLCVLAVPFTPFVTMAQGTSVYVSTLTLMSIAIDRFVCYMIIISIWLFSISATLPYAFYMVFSGFTAIMQFVVPFIIILICYGMLIAMVTIFGVSWLPMNVVHLVLCFFITHVVAMSSTCYNPFLYAWL
Pt-GPCR-A22	TRINITY_DN12640_c0_g2_i1	TTSAYLLNVALCNVLMVALSLAILLIQNWVFGSFLPLHVTMGTLLAVAGDSYRRVLATWILGVCIVLPYALYMHYIVTEYIHCLFIILFVLPLGVVVLSSMDDPTPLSPPRPLDLHPRVWNLHSTDRVFSSGLL
Pt-GPCR-A23	TRINITY_DN17364_c5_g2_i1	YIFLYSLLVVCGTVGNAAMIAHILYLMNIAVCQFIMSFPLLPLMIQDAPIHATMVTLVVVSVDRYFIAVLGVWITSVCVVLPYAIYMIAEYIRGLFIMLYVLPLAVIGFVLASMVTAFALCLCPLMILRLVITFVWVAFLPTVTTPALYAAW
Pt-GPCR-A24	TRINITY_DN17099_c3_g1_i2	IYQMYACIFVIALLGNTLVLYTVAALFIANLAVGDLLIMVFCVPFSVYSQAVSIFVSAYTLVAISLDRYVIIAAVWFMALVTTLPIAVFSYTMSLMILQYFLPLLVLIYTYSMTLAVVLVYSLCWLPFNILMVILFICHWLAMSHACYNPLILCWM
Pt-GPCR-A25	TRINITY_DN16713_c0_g1_i1	YVAYGVVAPIIVSVGMLGNILVIALLVFSFFTVLAVADLLSLGLCISPLHLLFVGTAMSTSVLIVVCITVYRFFISMAAALGTAVIAWLPMSFLLVTFLPIVAVVTLNLFTLRGFLLLIAVMSSFVITIVPSGIANAILEFVIFSAVANNLEILNHTLNFYLYI
Pt-GPCR-A26	TRINITY_DN19006_c0_g2_i2	WVIYQVVFPALVGVGVMANLLNLVVLYLNHLAVSDLLYLLFNVPFYVGVPLVNMFLTMSEYIVVWLSYDRVVRERCGLSLALTMAVYCLSPLSYSRFLPALLVTGFNVAIVVTLLFVLLVAVTVLFYVTAFPSAMYVLRPIADMLEVSGHVFNFVLYF
Pt-GPCR-A27	TRINITY_DN18646_c0_g1_i1	FAVFCCVLFIVLGVPGNLITIIALVFIINLTLSDLMFCVFNLPLAAILRYGLVAVSVFTVLAITINRYLTVMVLSTWLGAFGALVPTLLFLFVFAFVLPCVAICVCYARIFFILKMILVIFMSFVACYLPITLVVLNILGLLLIYMTTCINPIIYVVM
Pt-GPCR-A28	TRINITY_DN18619_c0_g1_i1	VHGYLALMICVLGAFTNVLNMVILILTGLAVADFLLLIEYSFYAASHYTQVTHTVAICLTITLAVWRYLAVFIAYVISPILSVPNYLVYINFWFHSVLIKIIPCLLLTVLIYHIIRMLLTVLLLFLATEMPQGVLALLWGEVMDLLALINSAVNFLLYY
Pt-GPCR-A29	TRINITY_DN14976_c0_g1_i1	LIAMYSVLIVLGSTGNSMVVAAVIFIINLAISDLLLCLVTMPLTLVVGTLQATSIFVSTISITAIALDRYVLLLLLIWAVAFILALPNFIWYSVFVMLVQYCLPIVTVSVAYAMICLLIAIALVFCLSWLPLNLYNLIVMLVVYAVCHMMGMSSACSNPLLYGW
Pt-GPCR-A30	TRINITY_DN10810_c0_g1_i1	PLAVYAATYVVGVAGNGLIIFTICVFLASLASADLLLILLCIPVLIYYMQALSALCSVLTLTVLSL
Pt-GPCR-A31	TRINITY_DN6774_c0_g2_i1	VNSTPSSILALTPTESHLSTFHGINGSLLSAGGNDSLVEEVMTMTVMMTVIYFLITVTGVLGNVATNYYLFSLAISDLLLLAFGMFTAEISTNASILTIAAFTVERYIGIIAVIWGVAIACAVPIAIQYGIVSGEEDPNSSACLIKNPIYLAF
Pt-GPCR-A32	TRINITY_DN19231_c0_g3_i1	VATYLIVFLVSLVGNLLVMLVVCYYLVNLAAADLLVTLVCMWVHIVGFVQTTTLLASVLTLTVISVGRFVIAAVWIASALIACPILFYRTILIIALFFLPVAIMIINYSLVVWTLWVVKMVTVVLLVFVICWTPLLTLILFLEFAAYFIAYSNSALNPIIYCGF
Pt-GPCR-A33	TRINITY_DN9397_c0_g1_i1	VGVWIVSLLTLLGNLMVLGGILSLFIRNLAVADLLTGLYLLVIAVITGVLAMTSSEVSVLILSFMSVERWMALTFIWLIGVSLALAPVFYYGLLFVGLNQLGVILILVSYTGMFYSIRFFFIVFTDCLCWTPIIVLRIMALYVVVVLLPINSALNPFLYTFT
Pt-GPCR-A34	TRINITY_DN18679_c0_g1_i1	LYGYAMPVLLLVTTVANTLIVAVLNAVLMAMALSDMLTVLFPEPTFMFHTASIWLTVLLATQRYISNIVTWAIVWVFFFAAIHQTPIYFWFRVVFVHLGPCTVLVVLNVLLFLMLIVVVSVFLVTEIPLAVITVLHIMVMRFFIISNSFIIFSYPINFAIYC
Pt-GPCR-A35	TRINITY_DN16349_c0_g1_i5	CMSLVVCVFGSVANVINMVVVSPTNAILTGLAVTDLLVMVVFILFHAHFGQVFHTISIGLTVT
Pt-GPCR-A36	TRINITY_DN15999_c0_g1_i2	LIWYVVFMGMVIVATGGNTIVIWIVLIFLVNLSVADAMVSTLNVVFNFISQFVSILSICASVFTLMAISFDRILIVVWIWVSSVCLSLPNLIYFTVVLMVLTYILPLTCMGFTYVRIGVKMMIVVVTIFAVCWLPYHMYFILAIYWLAMSNSMYNPMIYCWL
Pt-GPCR-A37	TRINITY_DN14439_c0_g1_i1	WTLAFGAMLLVAVGGNAIVMWIVIFLVNLSAADLLMAIFNCIFNFIYMLFMANVTIAASVFTLMAISFDRYFIIFIWLSSMSLAVPCLLYSTIVFFATTYVLPMLVMLVSYTLISCVRMFIVIVVAFMLCWLPQQGFFLLGFYWLAMANAMVNPIIYYWM
Pt-GPCR-A38	TRINITY_DN24806_c0_g1_i1	MAVGGNILVIWIICAHRRMFLLNLSAADLFMSVLNCMFNFIYMLFMANVTISASVFTLMAMSFDRFVFILVIWGSSMLLSLPCLLFSTVVFFITTYLMPMLVMLWSYFRIGVKMFLVIVAVFAVCWLPQQAFFLLTCYWLAMANAMINPVIYYWM
Pt-GPCR-A39	TRINITY_DN15671_c0_g1_i1	IVTLLAIFVLTVLGNVVVLFMLLVCYFILSLCVSDLVTAFLNVLPQLVWFAQLLGPYLNSYLLVMTALDRYMIYLAWALALGSCTPQVFVFTWYALSVFILPLFFLIIVYTCICVKLTVTVIFCYVSCSAPFISVQLWFTILMLLSSLNSVVNPWIFLA

## Sheet: GPCR-B phylogenetics
Name	NCBI Identifier	7TM sequence
Dm_DH44_2	AAF58250.1	AIIYAGGYFLSFATLVVALIIFLSFKDLRCLRNTIHANLFLTYITSALLWILTLFLQVITTESSQAGCITLVIMFQYFYLTNFFWMFVEGLYLYTLVVQTFSSDNISFIIYALIGWGCPAVCILVWSIAKAFAPHLENEHFNGLEIDCAWMRESHIDWIFKVPASLALLVNLVFLIRIMWVLITKLRSAHTLETRQYYKASKALLVLIPLFGITYLLVLTGPEQGISRNLFEAIRAFLISTQGFFVALFYCFL
Dm_DH44_1	AAF58501.4	IIYYIGYTLSLVSLSLALIVFAYFKELRCLRNTIHANLFFTYIMSALFWILLLSVQISIRSGVGSCIALITLFHFFTLTNFFWMLVEGLYLYMLVVKTFSGDNLRFNIYASIGWGGPALFVVTWAVAKSLTVTYSTPEKYEINCPWMQETHVDWIYQGPVCAVLIINLTFLLRIMWVLITKLRSANTVETRQYRKAAKALLVLIPLFGITYLVVLAGPSESGLMGHMFAVLRAVLLSTQGFSVSLFYCFL
Dm_PDF	AGB93483.1	TLEIVGLCLSLFALIVSLLIFCTFRSLRNNRTKIHKNLFVAMVLQVIIRLTLYLDQFRRGNKEAATNTSLSVIENTPYLCEASYVLLEYARTAMFMWMFIEGLYLHNMVTVAVFQGSFPLKFFSRLGWCVPILMTTVWARCTVMYMDTSLGECLWNYNLTPYYWILEGPRLAVILLNFCFLVNIIRVLVMKLRQSQASDIEQTRKAVRAAIVLLPLLGITNLLHQLAPLKTATNFAVWSYGTHFLTSFQGFFIAL
Dm_DH31	AHN59298.1	VGYGTSLLAILLSLAILGYFKSLKCARITLHMNLFASFAANNSLWLVWYLLVMPNSELLHQSPMRCVALHITLHYFLLSNYSWMLCEGFYLHTVLVAAFISEKRLVKWLIAFGWGSPAIVIFVYSMARGLGGTPEDNRHCWMNQTNYQNILMVPVCISMFLNLLFLCNIVRVVLLKLNAPASIQGSCGPSRTVLQAFRATLLLVPLLGLQYILTPFRPAPKHPWENTYEIISAFTASFQGLCVAILFCF
Sv_GPCR_B1	Buckley et al, 2016	YIAGYSMSLIALCISLFIFCFFKSLKCTRVTIHKNLFVSFIINNAMWLVWYECVVSFPDVVASNSSGCRVLHVFLHYFLVSNYFWMFCEGLYLHTLLVVAFVAEDRIMKWFYLLGWGSPAFFTIIYGACRSTDEDQDLHCWMDDGPYNYIMSAPVVLSMLLNLFFLINIVRVLVTKLRAVNTAPDTHSTRKAVRATLILIPLLGLHYILIPFRPPKDSPGEGVYLVVSAVAASFQGLGVSLLFCF
Sv_GPCR_B10	Buckley et al, 2016	VVVSALMSISCVFLAITWIIYVSVPLLRSRNMGRCILSFISAMFVSFLTIIINKHHREGFSAAQCSVTATVSHLCILATFFWINVMSFHIFSHLKLPHSDQREGVRLFLLYNLYAWGSSLLVTLIGLILDLTQADFLRPHFELPNCWFIDQASRWVYQYGILLLLIVINIGFFVASVVLLRQRQRSGSQTHTVCVLVYLRLFIITGVLWITEVLTWQASNQCGIVVVILDIINSLQGVYIFLV
Sv_GPCR_B11	Buckley et al, 2016	YIYSVFLAISDLFILVSFIVYLTVPDQNKRGLNKNVKLAHSVLGRILLCFLFSLFFAYLFLIVIKLFSDPINLASPNACVAVGVCMYMFFMATFFWLNVLCFELWWKCARQESSSGRRWVWYQVYAWFCPMIFGAISLIMEFTPSISNCYIKPKFGTYSCFFSYTVTHNNGAKWAYFFGPVAVLLLADLVFFVLTVRSLLVTVQQSHKGTVQKQARQRLRLCFKLFLVMGISWMAEIISFQMGPSTVWYISDVFNCFQGFIIFLIFIL
Sv_GPCR_B12	Buckley et al, 2016	IYAWSIPTLVVAISLIFNYTDVLPEYKPDYATQLCWMNNEYGLVLFFLLPVGAIVLENTVLFFVTSCGIYKQAKAAKYANTRSQSVKGGYEPKEAKKMKYEKMHKQGALKHATQGRRSKKDRVRLVLYLKLGLIQGITWVMGFVAAFSDIPAFWYPFTVLNGLQGAFIFIGFDMKKMVGELVWEALFGRPWKKHRKSKETRTTTVSQSSSSQNRSSKSYSPQKARRHKTPVYTNSLQSPPHTDSLQSPSDPV
Sv_GPCR_B13	Buckley et al, 2016	VILILVLLGVSCVFLAATMAVYLGVPELRERTNGRCLISMVSAMLTAYISIICNRLIREQSNTQCIIVAFVGHVSSLATFFWLNVMCYDMWSTLRSSQQQHHSMKRFLLYSAYAWGCPLVMGVAAVVIDSQETSNLIRPRFTESTCWFYGNVEYWLYLHGINCILLLVNLFFFVHVALTLSKKLKQRRMVFETSTSRSSNTTKTREQAWLYAKLFIVMGVVWIAEVLSSVHHRNTCTYWVLTDIINGLQGVFIFIVA
Sv_GPCR_B14	Buckley et al, 2016	SVVGYSVSLVTLVISFIILASLRKLRCPRNLLHLHLFGSFMLRALVVLLKSSLLMDGIALPQNFHLQDGEPYFNDGSEQTWACKLMISVWQYFILANYSWLLMEGLYLHSLIFMALFTDSSAITLYILLGWGLPLGCVGLWATLRATLDDAHCWTVNNIQWIFWVCIRAPVAISNLISFFFFLNVVRVLILKLRSSISAESMKYRKLGKSTLVLVPLFGVHYFVLWGLSTSTNAYVELVWLFLDQVFASFQGFFVAVLYCL
Sv_GPCR_B15	Buckley et al, 2016	TIFYIGNSLSLVAVTLALWIFISFKDLRCLRNTIHTNLLFTYLLHNLFWIVYASVQTLVNVTVGCSFFVALNYFTLTNFMWMFVEGFYLYMLVVKTFSVENIKLRVYTLIGWGVPVPIIILWVILKSQLTLSDTGSELVAAGMEGAELEGLLRNCPLMPDNATDWIQKVPVLFVLSTNLIFLTRIMWVLITKLRSANTVETQRYRKATKALLVLIPLLGLTYMLLIALPQELEHVRATLLSTQGFWVALFYCFLN
Sv_GPCR_B16	Buckley et al, 2016	YVTFIGALLSLLTLTITIFIFTYFRTLECDRLRVHRNLVAALIIRFLVMLVLTEPFVSNRQTLTYRDVDWLCKSLLALRMYAQMASINWMFVEGLFLHSRLTSNVFDSGAPFTLYYIIGWGAPLVFILAWATTMSLHYPVHCWRAYGSLSYVWILVAPMVAALMVNLLFLINIIRILVTKLRAGDAVRTGQVSGAPGQRPLFQPPNRHKTQHTQQHTHLQPHNKSQQEQQQHKQKEGSPDTNHHPEQQQEQTTHSKHDLKFTSCYVENDPNWDSQSCPLAPESNSHRKSRESSPLLHCRNGENSLAGQDCPHQHPAARRHMYTNLQHYPSVGYAT
Sv_GPCR_B2	Buckley et al, 2016	FVQTRLNSSSLLSEAFENIAFKVKVPESEGDHSLTATRQFISVERVDLEINSTIIGFQSTSGVMKEKTLKVGKTFDILDTDVAIIFPDNLTRIVAAGSGPLARMQPDGKQKIQLTFAVYRNPKLFQDNKSYPNYTVNSHVLQATYNNKVVTNLKEPVRLIFRPSRQGNDSKCVYWDFQKNSGRGGWSTEGCWKGQAVGDRQECFCNHLTSFAQLMNYNDEQIGGVHSVVLNIITIIGCSLSIVSLLLVFTTFFLFKKWRRHIRNKILVNLSFSIFCSIVIFLAGINQTWNDILCRSVAVALHYFILA
Sv_GPCR_B3	Buckley et al, 2016	ILAYVGCVVSLVCVAGSLLVFSVFRGLASPRTAVHRHVCVCLTAAELVFLVGVWRTDIPILCGVVAGILHYTVLSAFAWMFMEGVHVYLSVARAVECDSLRLRWWHYTLAYGLPLLVVAAAAVIDPFSYGTDQYCWLRTDNYFVFSLVGPALLLLAAHVALLAAALIYTCRLSPDDALKTKEMARLDSTRAWLRGAITLLLLMVLTWTLGLLFLHRPSLPIATAFCVLNALHGIFIFIYYCV
Sv_GPCR_B4	Buckley et al, 2016	GVYVGSAICILFLMASIVTWAAHHHRIATMNKNKHSLMNTWIALLLLVTLFTVGVYQTENQKLCQGIGVALHYLTTCVLLWIIVTVTNLYKKVTKALRPPVPVEDSPPDIPLPPKPMLRFYLVGWGIALILCGISAAVNLQQYAGYSYCFLAWGPSLGAFYAPTAALAFLLSTFFLLTHCMLRSLRANYPEATGATETTELELLDANSPTSENANGPGEEELSIASRDTAVSVSDGQHSPLTQLRAHVVTLLLFILTWAAAAITTAAPFASVIPHHTTIFSIIYAICASSLGIFIFVFFC
Sv_GPCR_B5	Buckley et al, 2016	IITYVGLALSTAGLIATVATYAIFRTLNRDRSGKIVMNLSLALLLLNLVFIAAAQLKPPSIACTALAAALHYLVIAAFAWMLVEAANMYQLLITVFASAETHFMAKRVIAAWGIPIIVVVAALIADLDVYGDKNHGFCVISPIPNPAVYYSTYMGPICCVLLVNCVVFLMVTRVLCQRRPRSHKPRSLSRKSTKELPITLAQVRGAVTVVALLGVTWVAGAVSVGWARLTLQYIFCLTTPLQGLIIFIV
Sv_GPCR_B6	Buckley et al, 2016	IITLVGCSLSIIGLLLVFTTFFLFKKWRRSLNNKILVNLAFSVFCSVVIFMAGINQTRSVILCRGVAVGLHYFILASFGWMLVEAVHQYQNFVKVVGTYIPRFLWKASVCAWGIPVLPILVVLVYDSSLYDSNQDYNSNAKICWMSPDGFRYAFLPPLVATMTVNLIIFCLIINGAVCGRAHITSTMSERTLLMNQLGMAICVFFLLGFTWIFGLLAVCQIRIVFSYLFCIFNTLQGFFLFFF
Sv_GPCR_B7	Buckley et al, 2016	WVSLAGLGLSCVCLLVHLIAFLIVPDLRNLSGKNLTSLCIVLLAAYTTFILSVFGEPGKRECFILAAAMYYFFLSSFCWMSVMAFDIWRTLKLATSELRVSAGGQNRKFFIYSLYGWLLPAAALAALVTLDLVRPDGMPSQYFPTLGERWCWFGQRKALLVFFAAPLTTIMLMNIMLFIFSARIIAETTQSTAKMTSCSPHQNQFKLYMRLALLMGLTWISGIVAGYLQLEPIWYIFVLLNTLQGVFIFLAFTC
Sv_GPCR_B8	Buckley et al, 2016	TLYPVGLIISAVFLAATLFVYCMVVELRDLLGRCLMCSVFALGVAQVFTVIVQMATRFLSMPACVFVGVMMHFWYMSAFLWLNVICFNVFLTIWWKSDGSYGRVSKWFAIYSAYAWGLAILITSVAVARDFSEGLEDSPLPKPNFGQAKCWFSGDDALIIFFYGPTSVVLGINVVLFVASAYKLCSLNKNSEARLFQFSLYLKLFVLMGVTWIFEAISFFVQRKTTNSSGNYVWLVFDFINIMQGVIIFIVFV
Sv_GPCR_B9	Buckley et al, 2016	FCVGLEAGSGGVAPRYKAKLCFKDPAMAHQEACSNATCVRKCCPEGFFFTDKCTHVELASDMWEPVFHDPETLAAGAPAPDNLTLVYGYPICSSFFQLESHRMKEDKFYLLPDGSLYVPNFSKKFPADRYCLDKFLTREVHTLPLVCFQEDSVSASSACTAVQSFVYPVLLAVSCVFLGITLLIYVSVPELHAKVHGKCLVSHMSALLLAYVSLITVQWASGLMPQAACKIMASVTHFSFLAAFFWLNVM
Tu_DH44-like_1	tetur01g00270	YYFGYGLSLLALTTALFIFLYFKDLRCVRNTIHTHLIVTYELFALTWIITATLQSYQPTNEIAARILCFLYILLPYFTGTQFFWMFIEGLYLYILVVKTFSSVESIKIHFYATIGWGLPALVVLFWAPSKYFSAKSADNLNDSGSNCPWQAEDSIDSIFICPILFVLMLNIFFLCKIMWVLITKLRAATSAESRQYRKAAKALLVLTPLLGVTYILFLVTPGSGPAKTVFTYLQATLYSTQGFTVSVFYCFL
Tu_DH44-like_2	tetur01g03970	YYFGYGLSIVALFIALAILITFKDLHCIRNTIHINLMLSYMFHALTWIATASLQDSSLATYKISFHGICFLYILLTYFTASSFFWMFLEGLYLYILVVRTFSIERINLILFALIGWGFPVILVTLWAPIKYLYPNQEDEETLTVKSFNCPWQVINIIDLIYICPISIVLVVNLFFLGVIIYVLVSKTRASEASQEFQQYRKAVKALLVLTPLLGIAYILLLVTPDSGNAKIVYTYIHATLNSTQGFTVAVLYCFL
Tu_PDF-like	tetur04g08940	YTQCLSLLSSFSFPLEFSRLQCFIIHRNLVFALIIHCVSLLIISSSIVFDGQFNFTKENPILCKLVLSLKMYSALASINWMFIEGLLLHSRVTTGIFRKSFPFKLYYAIGWGIPLFIILTWAYIVNKTLHSRCWEGYGDRVTIWIITAPMILALLINSTFLVNIIRILVTQLSRNRSEETNKISRKALKATILLFPLLGITHLLFCFNPKDNKQLEMAYMITNAILQSSQGIFVSFFYCF
Tu_DH31	tetur15g02300	YIIGYSISVLALIISLIIFLSFKSLKCTRITIHKNLFISFIINNLMWIMWYTLVVSNVEVVQSNRWYCQMLHVVVNYFLLANYSWTFCEGLYLHTLLVVAFVAEEKIMKWFYVIGWGIPLIFIGFYAGFRGLSSNGKTNYCWIDESAYSWWYTGPVLVSFVLNLFFLVNIVRVLVTKMRAVNSPDAHQTRKAVKATLILLPLLGLHFLVTPFRPPEGTHAEEVYEIVAALVASLQGLCVAILFCF
Zn_GPR112	KDR13957.1	IVSRVGCCLSLICLFLVLLTFVMFRKWRSYLDSKIVASLSLSLFVMYLVFVTGFTQTSSKLVCISIAATLHYFILSSFCWMFVEAFHNYLKFVKVIGTYIPRFMWKASAGAWGFPFVPVISVLCYDYELYTNDKYCWVHKEAFSYGFLTPLCLICGGNVIVFLLIIISFTCARQKFESNQQQYSLLISKLRMSICIFVLLGLSWVFGFVRIVVPEIAFSYLFCITSTLQGFLIFLFFVV
Pc_PTH_1	Procambarus-GPCRB1	SMVGYSVSLATLVISFIILASLRKLRCPRNLLHLHLFGSFMLRALVVLIKNSSHVESVEHTWTCKLMISVWQYFIVANYSWLLMEGLYLHSLIFMALFTDSSAITCYILLGWGLPLGCVGVWATLRATLDDTDCWTVQNVQWIFWVCIRAPVAVSNLINFFFFLNVVRVLILKLRSSISTESMKYRKLGKSTLVLVPLFGVHYFVLWGLSTSTNAYVELAWLFLDQVFASFQGFFVAVLYCLM
Pc_PTH_2	Procambarus-GPCRB2	TLVTIPCPTYVQGFPHGSQATRYCTSQGTWFRLHGGNSSWTNYTQCSTSYFVAENVNITLFKWVPVVRVVSYVGYSVSLATLIVAFTVLACIKRLVSHRRLRCPSNTLHIHLFLSFICRAIGALARDKQHGLLIPETQEPFMDRSTWGCRLFTGLWQYFILANYAWILMEGLYLHNLIFLALFTDNSAITLYIVLGWGLPLVLVVGWVTARLTAENTLCWLTNESPWVFWTFIRGPISVSIVVSFVLFL
Pc_DH31_1	Procambarus-GPCRB3a	YMAGYSMSLVALCISLFIFFFFKSLKCTRVTIHKNLFLSFIINNAMWLVWYECVVNNVDLLASNAVECQVLHVFLHYFLVSNYFWMFCEGLYLHTLLVVAFVAEDRIMKWFYILGWGAPAILTIVYGCSRAADSAQNVHCWMDNGPYNYILSVPVVLSLLLNLFFLVNIVRVLVTKLRAVNTSPDTHSTRKAVRATLILIPLLGLHYILVPFRPPIGSPGEEVYLVVSAVVASFQGLGVSLLFCFF
Pc_DH31_2	Procambarus-GPCRB3b	YMAGYSMSLVALCISLFIFFFFKSLKCTRVTIHKNLFLSFIINNAMWLVWYECVVNNVDLLASNAVECQVLHVFLHYFLVSNYFWMFCEGLYLHTLLVVAFVAEDRIMKWFYILGWGAPAILTIVYGCSRAADSAQNVHCWMDNGPYNYILSVPVVLSLLLNLFFLVNIVRVLVTKLRAVNTSPDTHSTRKAVRATLILIPLLGLHYILVPFRPPIGSPGEEVYLVVSAVVASFQGLGVSLLFCFF
Pc_PDF_1	Procambarus-GPCRB4	YITFIGDFLSLLTLTITIFIFTYFRTLECDRLRVHRNLVVSLILRFMVMLVLTEPFISNRQTLIYRDVDWLCKTLLALGMYAQMASINWMFVEGLFLHSRLTSNVFDSGAPFTLYYTIGWGWSLVFLVAWATAMAIHHPVHCWRGYAVLPYVWILVAPMVTALMINLLFLVNIIRILVTKLRASDAVETTQVRKAIKATAVLFPLLGITNLLFAVNPGKGDLEGAYMLTNALLQSSQGVFVSVLYCFL
Pc_CRF-like	Procambarus-GPCRB8	TIFYIGNSLSLVAVTLALWIFLSFKDLRCLRNTIHTNLLFTYLLHNLFWIIYASIQTMVNVSVGCSFFVALNYCTLTNFMWMFVEGFYLYMLVVKTFSVENIKLRVYTLIGWGIPVPIIITWVILKSHLTITHSGTELAAVGMEKYELDGPDLEGLVRNCPLMPDSGIDWIQKVPVLFVLSTNLIFLTRIMWVLITKLRSANTVETQRYRKATKALLVLIPLLGLTYMLLIALPQELEHVRAILLSTQGFWVALFYCFLN
Mn-GPCR-B16	Sun et al,2020	YLIAVNGQNVSKAPHDDVARLIAENYYSDSSDDEFVTVSRPKPKVVRDLQSGAIFSEHTAIHLVEAAASTAAAAVTAFPPPKGVAAAVAAGVVMPAIAPSSSTSPTRLLLLQRSSNPHGGLSPETVQQHIQQQQQIQHQQQQQQNLLT
Sp-GPCR-B1	Bao et al,2018	IIGLSLSLASLCISLAIFFYFIHRNLFVAMVIQVMIRLVLYASYVLLEYARTAMFMWMFIEGLYVYHAVGWGVPVLMTAAWATATAMILEGPRFSVISLNMIFLLNIIRVLVVKAAIVLLPLLGITNVLNMIVAPLLWSYATHFLTSFQGFFIALLYCFL
Sp-GPCR-B2	Bao et al,2018	MAVWTWMLAESLYLHRLIVAWVYVLVGWVPALVLAVCWAVLLILIMNTVLLANMTRVLLTFLLPMFGLQFFLTLYLPPSVATVLDGLQGLYVSVVYCYI
Sp-GPCR-B3	Bao et al,2018	YIAGYSISLIALCCSLFIFCFFIHKNLFVSFIINNAMWLIWVVLQYFLVSNYFWMFCEGLYLHTWFFLLGWGIPAVLITFYAIFEGPYNHILNVPVVLSMLLNLLVTKLRAVNTGPDTHSTRVRATLILIPLLGLHYILV
Sp-GPCR-B5	Bao et al,2018	TIFYVGNSLSLAAVALALWIFIIHTNLLFTYLLHNLFWIIYAFFVTLNYFTLTNFMWMFVEGFYLVYMLIGWGIPVPIVALWVILWLHKVPVLVVLSLNLLFLAHIMWVTKALLVLIPLLGLTYMLLIALVRAVLLSTQGFWVALFYCFLN
Sp-GPCR-B6	Bao et al,2018	VYTLIGWGVPVPIMALWVIL
Sp-GPCR-B7	Bao et al,2018	IIGLTLSLVSLLLALFIFSYF
Sp-GPCR-B8	Bao et al,2018	IFLALFTDNSAITLYIVLGLVVGWAVARMMAENTLCWFTNAVGVSILVSFALFLNIARELLLARSTLVLVPLFGVHYAALLIWLFTDQLFASFQGFFVATLYCLLLSQSRTYFSSRGTGAPWMCAASMSVLEKTNGSPAQATCLSVL
Portunus trituberculatus GPCRs
Name	Unigene_ID	7TM sequence
Pt-GPCR-B1	TRINITY_DN18808_c0_g1_i2	IAAYTVSVFALLPALCIFFCYLHKHLFLSLLLNAAGVIAQRLLLINRYTSLTCYMWYFCEGLYLLLMFYLIGWGLPAVVMVVYGGLWLINLPPLLAILANIVFLFNIIRILVKAVRATLMVVPLFGLQYVVTLVYQLANNIIEGSTGWLVAVIFC
Pt-GPCR-B2	TRINITY_DN19377_c0_g7_i1	AATHAISLLALPPALFVLLYYLLHVHLFVALLGKALFNFIDNLALRIPILVFFAKGFNLAVWTWMLAESLYLWVYVLVGWVPALVVALCWAALHLIFDIPKLIILLVNTVLLANMAVKATVFLLPMFGLQFFLTLYLVYFIVATALDGLQGLYVSVVYCYI
Pt-GPCR-B3	TRINITY_DN10271_c0_g1_i2	WNATWMEGVFCNASWDTLHCWCANVFSDVPALLDYPDAVAAVRYITFIGGLLSLFTL TATIFIFLVAALIIRFLVMLVLTEPFVTLLALRMYAQMASINWMFVEGLFLLYYTIGWGAPLAFIVAWATTMALVWILVGPMVAALMVNLVFLVNI
Pt-GPCR-B4	TRINITY_DN18069_c0_g4_i1	YIAGYSISLIALCCSLFIFCFFIHKNLFVSFIINNAMWLIWVFLHYFLVSNYFWMFCEGLYLHTWFFLLGWGIPAVLITFYAIFHILNVPVVLSMLLNLFFLINIVRVLVKAVRATLILIPLLGLHYILVVYLIVSAIAASFQGLGVSLLFCF
Pt-GPCR-B5	TRINITY_DN18211_c0_g4_i1	TTFYVGNSLSLAAVALALWIFIIHTNLLFTYLLHNLFWIIYAFFVTLNYFTLTNFMWMFVEGFYLVYILIGWGIPVPIVALWVILWLHKVPVLVVLSLNLLFLAHIMWVTKALLVLIPLLGLTYMLLIALVRAVLLSTQGFWVALFFCFVN
Pt-GPCR-B6	TRINITY_DN18816_c3_g2_i1	SLIGYSVSLATLLVAFSVLACILHMHLFLSFICRAVGALARLFTSLWQYFILANYSWILMEGLYLITLYIVLGWGLPLILVVGWAVAFWTFIRGPVGVSILVSFALFLNIASTLVLVPLFGVHYAALLGFTYFMIIWLFTDQLFASFQGFFVATLYCLL
Pt-GPCR-B7	TRINITY_DN20475_c0_g1_i1	VIETVGLSLSLASILVSLAIFSYFMHFNLFVAMVIQLMVRLTLYIVYVLMEYARTAMFLWMFLEGHYLVYNLLGWGLPVVMTAVWAAVTAILEGPRLTVIITNFLFLLNILRVLIVRAAIVLLPLLGITNSLQMVHSFVTTFLTAFQGFFVALLYCFL
Pt-GPCR-B8	TRINITY_DN20478_c0_g6_i1	IIGLSLSLASLCISLAIFFYFIHRNLFVAMVIQVMIRLVLYIASYVLLEYARTAMFMWMFIEGLYVYHAVGWGVPVLMTAAWATATAMILEGPRFSVISLNMVFLLNIIRVLVVKAAIVLLPLLGITNVLNMIVAPLLWSYATHFLTSFQGFFIALLYCFL
