# Supplementary material for: Identification and characterization of expression profiles of neuropeptides and their GPCRs in the swimming crab, Portunus trituberculatus
Source: PeerJ. 2021 Sep 15;9:e12179. doi: 10.7717/peerj.12179 (PMC8449533; doi:10.7717/peerj.12179)
Supplement: Supplemental Information 3 [file peerj-09-12179-s003.xlsx]

## Sheet: Statistics
P. trituberculatus cerebral ganglia、eyestalk ganglia and thoracic ganglia illumina sequencing and transcriptome assmbly statistics
	Quality Control statistics			Denovo Assembled statistics
sample	Raw Reads	Clean Reads	GC Content(%)	total nucleotides	N50	N90	Minimum conting length(bp)	Maximum conting length(bp)	Median conting length(bp)	Average conting length(bp)
CG	49647468	47830400	44.43	124237692	3185	710	301	28583	1013	1784
EG	56450106	54190514	47.03
TG	48750212	46767062	44.75

## Sheet: Annotation statistics
	Number of Unigenes	Percentage (%)
Annotated in NR	13913	33.4
Annotated in NT	5720	13.73
Annotated in KO	6268	15.04
Annotated in SwissProt	10598	25.44
Annotated in PFAM	16181	38.84
Annotated in GO	16181	38.84
Annotated in KOG	6335	15.2
Annotated in all Databases	2189	5.25
Annotated in at least one Database	20939	50.27
Total Unigenes	41653	100
